# Supplementary material for: Gut Microbiome and Metabolome Modulation by High-Hydrostatic-Pressure-Processed Tomato Juice
Source: Nutrients. 2024 Feb 29;16(5):710. doi: 10.3390/nu16050710 (PMC10934475; doi:10.3390/nu16050710)
Supplement: Supplementary file 1 [file nutrients-16-00710-s001.zip › Table S3.xlsx]

## Sheet: Fresh vs Blank
ID	Metabolite	Metab ID	Significant	Regulate	KEGG Compound ID	Mode	CAS ID	M/Z	Retention time	Adducts	Formula	Fragmentation Score	Theoretical Fragmentation Score	Library ID	KEGG Compound First Category	KEGG Compound Second Category	KEGG Pathway ID	KEGG Pathway First Category	KEGG Pathway Second Category	HMDB Superclass	HMDB Class	HMDB Subclass	Fragmentation Score	Theoretical Fragmentation Score	KEGG Pathway Description	KEGG Pathway Description	VIP_pred_OPLS-DA	VIP_PLS-DA	FC(Fresh/Blank)	P_value	FDR	F_1	F_2	F_3	F_4	F_5	F_6	Blank_1	Blank_2	Blank_3	Blank_4	Blank_5	Blank_6
neg_44	Phosphatidylethanolamine lyso alkenyl 16:0	metab_18505	yes	down	-	neg	-	436.283	7.0372	M-H, M+Na-2H, 2M-H	C21H44NO6P	53.7	-	-	-	-	-	-	-	-	-	-	53.7	-	-	-	1.6789	1.5861	0.9455	0.001186	0.02942	6.9976	7.0505	7.4962	7.2665	7.0269	7.2236	7.4501	7.5069	7.5804	7.6923	7.7739	7.5399
neg_149	Deoxyguanosine	metab_18608	yes	up	C00330	neg	961-07-9	266.09	3.19888	M-H, M+Na-2H	C10H13N5O4	89.8	-	HMDB0000085	Nucleic acids	Nucleosides	map01100;map02010;map00230	Metabolism;Environmental Information Processing;Metabolism	Global and overview maps;Membrane transport;Nucleotide metabolism	Nucleosides, nucleotides, and analogues	Purine nucleosides	Purine 2'-deoxyribonucleosides	89.8	-	Metabolic pathways; ABC transporters; Purine metabolism	Metabolic pathways; ABC transporters; Purine metabolism	1.0129	1.011	1.028	0.01715	0.1179	6.9163	6.9469	6.8877	6.9665	6.8238	6.89	6.7795	6.6666	6.863	6.5229	6.5768	6.8959
neg_200	(R)-2,3-Dihydro-3,5-dihydroxy-2-oxo-3-indoleacetic acid	metab_18658	yes	up	-	neg	-	222.041	0.7628	M-H2O-H, M-H	C10H9NO5	-	63.8	HMDB0038941	-	-	-	-	-	Organoheterocyclic compounds	Indoles and derivatives	Indolyl carboxylic acids and derivatives	-	63.8	-	-	2.1912	2.0712	1.1111	3.816e-06	0.001276	6.0961	6.1383	6.1502	6.1542	6.0068	6.0084	5.6266	5.2405	5.5939	5.4149	5.4294	5.593
neg_262	SM(d18:1/12:0)	metab_18720	yes	up	C00550	neg	-	645.495	6.41662	M-2H, M-H	C35H71N2O6P	-	55.1	LMSP03010002;HMDB0012096	Lipids	Phospholipids	map00600;map01100;map04071;map04217	Metabolism;Metabolism;Environmental Information Processing;Cellular Processes	Lipid metabolism;Global and overview maps;Signal transduction;Cell growth and death	Lipids and lipid-like molecules	Sphingolipids	Phosphosphingolipids	-	55.1	Sphingolipid metabolism; Metabolic pathways; Sphingolipid signaling pathway; Necroptosis	Sphingolipid metabolism; Metabolic pathways; Sphingolipid signaling pathway; Necroptosis	1.2762	1.2399	1.0497	0.01583	0.1134	6.445	6.3478	6.4466	6.3724	6.3481	6.4291	6.0866	6.3331	6.2381	5.7512	5.8326	6.3258
neg_380	(3beta,5alpha,6beta,9alpha,22E,24R)-23-Methylergosta-7,22-diene-3,5,6,9-tetrol	metab_18837	yes	down	-	neg	243449-55-0	459.348	7.1597	M-H, M+Na-2H	C29H48O4	-	52.9	HMDB0033634	-	-	-	-	-	Lipids and lipid-like molecules	Steroids and steroid derivatives	Ergostane steroids	-	52.9	-	-	1.5508	1.4784	0.9414	0.01074	0.09242	7.0277	6.9837	6.7788	6.448	6.4842	6.7026	7.2433	7.2279	6.8746	7.4719	6.9346	7.1839
neg_642	N-acetylaspartate	metab_19098	yes	down	C01042	neg	-	174.04	0.567217	M-H	C6H9NO5	95.8	-	HMDB0000812	-	-	map01100;map00250	Metabolism;Metabolism	Global and overview maps;Amino acid metabolism	Organic acids and derivatives	Carboxylic acids and derivatives	Amino acids, peptides, and analogues	95.8	-	Metabolic pathways; Alanine, aspartate and glutamate metabolism	Metabolic pathways; Alanine, aspartate and glutamate metabolism	2.4163	2.3236	0.8681	5.584e-06	0.001442	4.8435	5.2154	4.9704	4.6813	5.083	5.066	5.7718	5.8071	5.5427	5.7649	5.7596	5.7523
neg_649	N-Acetyl-L-glutamic acid	metab_19105	yes	down	C00624	neg	1188-37-0	188.056	0.5739	M-H	C7H11NO5	85.4	-	HMDB0001138	-	-	map01100;map01210;map00220;map01110;map01230	Metabolism;Metabolism;Metabolism;Metabolism;Metabolism	Global and overview maps;Global and overview maps;Amino acid metabolism;Global and overview maps;Global and overview maps	Organic acids and derivatives	Carboxylic acids and derivatives	Amino acids, peptides, and analogues	85.4	-	Metabolic pathways; 2-Oxocarboxylic acid metabolism; Arginine biosynthesis; Biosynthesis of secondary metabolites; Biosynthesis of amino acids	Metabolic pathways; 2-Oxocarboxylic acid metabolism; Arginine biosynthesis; Biosynthesis of secondary metabolites; Biosynthesis of amino acids	1.86	1.7876	0.928	1.03e-05	0.00187	5.9455	5.9143	5.918	5.6298	5.7826	5.7495	6.3161	6.3533	6.2301	6.2718	6.1967	6.2819
neg_657	Glu-Thr	metab_19113	yes	down	-	neg	-	247.093	0.591383	M-H	C9H16N2O6	72.4	-	HMDB0028829	-	-	-	-	-	Organic acids and derivatives	Carboxylic acids and derivatives	Amino acids, peptides, and analogues	72.4	-	-	-	1.0244	1.0016	0.9583	0.03462	0.1734	4.8587	5.2026	5.1059	4.8226	5.0337	5.0499	5.3012	5.1424	4.996	5.3779	5.4164	5.1451
neg_661	5-L-Glutamyl-L-alanine	metab_19117	yes	down	C03740	neg	-	217.083	0.5947	M-H	C8H14N2O5	68.3	-	HMDB0006248	-	-	map01100;map00480	Metabolism;Metabolism	Global and overview maps;Metabolism of other amino acids	Organic acids and derivatives	Carboxylic acids and derivatives	Amino acids, peptides, and analogues	68.3	-	Metabolic pathways; Glutathione metabolism	Metabolic pathways; Glutathione metabolism	2.0298	1.9451	0.8966	0.0001957	0.00979	4.9983	5.0747	5.2133	4.9205	5.0348	5.0324	5.7757	5.637	5.2804	5.785	5.8648	5.4245
neg_684	(3R,4S,5R)-5-(hydroxymethyl)oxolane-2,3,4-triol	metab_19140	yes	down	C00121	neg	613-83-2	195.051	0.608683	M+FA-H	C5H10O5	55.3	-	HMDB0000283;MJDBWX000002396	Carbohydrates	Monosaccharides	map01100;map02030;map00030;map02010	Metabolism;Cellular Processes;Metabolism;Environmental Information Processing	Global and overview maps;Cell motility;Carbohydrate metabolism;Membrane transport	Organic oxygen compounds	Organooxygen compounds	Carbohydrates and carbohydrate conjugates	55.3	-	Metabolic pathways; Bacterial chemotaxis; Pentose phosphate pathway; ABC transporters	Metabolic pathways; Bacterial chemotaxis; Pentose phosphate pathway; ABC transporters	1.5479	1.5568	0.9228	0.003047	0.04874	4.3458	4.7349	4.6366	4.416	4.6121	4.6321	5.1083	4.7152	4.8063	4.805	5.0886	5.1469
neg_758	Taurine	metab_19214	yes	up	C00245	neg	107-35-7	124.007	0.651083	M-H	C2H7NO3S	77.2	-	HMDB0000251	-	-	map01100;map00920;map00430;map02010;map00120;map04080	Metabolism;Metabolism;Metabolism;Environmental Information Processing;Metabolism;Environmental Information Processing	Global and overview maps;Energy metabolism;Metabolism of other amino acids;Membrane transport;Lipid metabolism;Signaling molecules and interaction	Organic acids and derivatives	Organic sulfonic acids and derivatives	Organosulfonic acids and derivatives	77.2	-	Metabolic pathways; Sulfur metabolism; Taurine and hypotaurine metabolism; ABC transporters; Primary bile acid biosynthesis; Neuroactive ligand-receptor interaction	Metabolic pathways; Sulfur metabolism; Taurine and hypotaurine metabolism; ABC transporters; Primary bile acid biosynthesis; Neuroactive ligand-receptor interaction	1.5913	1.6056	1.0954	0.04428	0.197	6.3581	6.0064	5.7732	6.3108	6.0827	5.9137	5.6762	5.0992	5.7025	5.0713	5.2862	6.4373
neg_902	Deoxyadenosine monophosphate	metab_19354	yes	down	C00360	neg	653-63-4	330.061	0.767583	M-H	C10H14N5O6P	80.9	-	HMDB0000905	Nucleic acids	Nucleotides	map01100;map00230	Metabolism;Metabolism	Global and overview maps;Nucleotide metabolism	Nucleosides, nucleotides, and analogues	Purine nucleotides	Purine deoxyribonucleotides	80.9	-	Metabolic pathways; Purine metabolism	Metabolic pathways; Purine metabolism	3.5911	3.4191	0.6223	0.001167	0.02928	3.1606	3.152	3.1666	3.2058	3.162	3.1712	5.3431	4.7524	3.1287	5.5732	5.8987	5.8666
neg_1071	O-Cresol	metab_19520	yes	up	C01542	neg	95-48-7	107.049	1.4941	M-H	C7H8O	90.1	-	HMDB0002055	-	-	map01100;map01220;map00623;map01120	Metabolism;Metabolism;Metabolism;Metabolism	Global and overview maps;Global and overview maps;Xenobiotics biodegradation and metabolism;Global and overview maps	Benzenoids	Phenols	Cresols	90.1	-	Metabolic pathways; Degradation of aromatic compounds; Toluene degradation; Microbial metabolism in diverse environments	Metabolic pathways; Degradation of aromatic compounds; Toluene degradation; Microbial metabolism in diverse environments	1.4457	1.387	1.0594	0.003237	0.04991	5.8518	5.7921	5.966	5.8481	5.7617	5.5429	5.3904	5.401	5.6812	5.3409	5.6415	5.3582
neg_1171	4-Vinylphenol	metab_19620	yes	up	C05627	neg	2628-17-3	165.055	2.51557	M+FA-H	C8H8O	69.9	-	HMDB0004072	-	-	map00940	Metabolism	Biosynthesis of other secondary metabolites	Benzenoids	Benzene and substituted derivatives	Styrenes	69.9	-	Phenylpropanoid biosynthesis	Phenylpropanoid biosynthesis	1.3246	1.2698	1.0535	0.002866	0.04766	5.3776	5.2883	5.4586	5.3824	5.3535	5.4183	5.2149	4.9881	5.321	5.013	4.9066	5.1973
neg_1436	4-Hydroxy-2-Quinolinecarboxylic Acid	metab_19882	yes	up	C01717	neg	-	188.035	3.9165	M-H	C10H7NO3	92.1	-	HMDB0000715	-	-	map01100;map00380	Metabolism;Metabolism	Global and overview maps;Amino acid metabolism	Organoheterocyclic compounds	Quinolines and derivatives	Quinoline carboxylic acids	92.1	-	Metabolic pathways; Tryptophan metabolism	Metabolic pathways; Tryptophan metabolism	1.4332	1.3651	1.0789	0.02018	0.1284	5.2546	5.107	5.1011	4.8952	4.9748	5.0218	4.9853	4.4691	4.9736	4.7063	4.2072	4.7952
neg_1465	N-Acetyl-L-leucine	metab_19911	yes	down	C02710	neg	-	172.097	4.061	M-H	C8H15NO3	95.4	-	HMDB0011756	-	-	-	-	-	Organic acids and derivatives	Carboxylic acids and derivatives	Amino acids, peptides, and analogues	95.4	-	-	-	1.2656	1.2087	0.9455	0.005682	0.06926	4.5359	4.6651	4.5598	4.3459	4.3785	4.4775	4.759	4.8862	4.6938	4.5119	4.8531	4.8141
neg_1583	Gravacridonetriol glucoside	metab_20029	yes	down	-	neg	59086-96-3	554.141	4.79632	M+Cl	C25H29NO11	-	66.4	HMDB0029331	-	-	-	-	-	Lipids and lipid-like molecules	Glycerolipids	Glycosylglycerols	-	66.4	-	-	1.5311	1.5876	0.9203	0.0278	0.1536	5.0993	5.2658	5.4482	4.8702	5.2422	5.3349	5.8109	5.2379	5.4586	5.6412	5.4886	6.3278
neg_1630	2-(4-Hydroxyphenyl)ethanol	metab_20076	yes	down	C06044	neg	-	137.06	5.0286	M-H	C8H10O2	65.4	-	HMDB0004284	-	-	map01100;map00350	Metabolism;Metabolism	Global and overview maps;Amino acid metabolism	Benzenoids	Phenols	Tyrosols and derivatives	65.4	-	Metabolic pathways; Tyrosine metabolism	Metabolic pathways; Tyrosine metabolism	2.1758	2.0662	0.8832	0.0001103	0.007702	5.2065	4.8134	4.8673	4.9187	4.7795	4.7285	5.4841	5.7122	5.4485	5.6156	5.7229	5.2116
neg_1776	Geosmin	metab_20221	yes	up	C16286	neg	19700-21-1	227.165	5.89238	M+FA-H	C12H22O	-	57.4	HMDB0036461	-	-	map01110;map00909	Metabolism;Metabolism	Global and overview maps;Metabolism of terpenoids and polyketides	Organic oxygen compounds	Organooxygen compounds	Alcohols and polyols	-	57.4	Biosynthesis of secondary metabolites; Sesquiterpenoid and triterpenoid biosynthesis	Biosynthesis of secondary metabolites; Sesquiterpenoid and triterpenoid biosynthesis	1.845	1.7432	1.1249	0.006395	0.07245	4.8523	4.947	5.4888	4.7028	4.9109	5.0874	4.7169	4.1218	4.3218	4.2286	4.4029	4.864
neg_1808	L-phenylalanyl-L-proline	metab_20253	yes	down	-	neg	-	261.124	6.03523	M-H	C14H18N2O3	60.2	-	HMDB0011177	-	-	-	-	-	Organic acids and derivatives	Carboxylic acids and derivatives	Amino acids, peptides, and analogues	60.2	-	-	-	1.4025	1.3428	0.947	0.002616	0.04602	5.4471	5.6463	5.5434	5.4026	5.5487	5.6776	5.8874	5.7575	5.6616	5.9925	6.0728	5.7537
neg_1923	1-Methoxy-3-carbaldehyde	metab_20366	yes	up	-	neg	-	220.061	6.26075	M+FA-H	C10H9NO2	52.7	-	-	-	-	-	-	-	-	-	-	52.7	-	-	-	1.7035	1.6287	1.0802	0.0007248	0.02257	5.6926	5.7599	5.6708	5.6317	5.7288	5.7113	5.2967	5.2368	5.6171	5.0877	5.034	5.3816
neg_1947	[2-hydroxy-5-(7-hydroxy-4-oxo-4H-chromen-2-yl)phenyl]oxidanesulfonic acid	metab_20390	yes	up	-	neg	-	349.002	6.2729	M-H	C15H10O8S	-	56.4	HMDB0133329	-	-	-	-	-	Phenylpropanoids and polyketides	Flavonoids	Flavones	-	56.4	-	-	2.5726	2.4211	1.2813	0.004586	0.06132	4.0357	4.9062	4.8418	4.6628	4.9318	5.213	4.3933	3.2692	3.2178	3.7212	3.2452	4.4664
neg_1998	(2-oxo-2,3-dihydro-1H-indol-3-yl)acetic acid	metab_20437	yes	up	-	neg	-	172.04	6.31642	M-H2O-H	C10H9NO3	84.6	-	-	-	-	-	-	-	-	-	-	84.6	-	-	-	1.6489	1.5691	1.106	0.01056	0.09149	5.0728	5.1235	5.1329	4.5026	4.4895	4.5452	4.498	4.4161	4.422	4.1774	4.1463	4.4374
neg_2136	Ononetin	metab_20564	yes	down	-	neg	-	257.082	6.41662	M-H	C15H14O4	61.4	-	-	-	-	-	-	-	-	-	-	61.4	-	-	-	1.7801	1.6847	0.9245	0.0008164	0.02412	5.4932	5.5088	5.7415	5.7745	5.5116	5.7675	5.9684	6.0371	6.0157	6.3826	6.2711	5.8812
neg_2250	Prosapogenin	metab_20671	yes	up	-	neg	24404-56-6	661.359	6.52013	M-H	C36H54O11	-	91.1	HMDB0041131;HMDB0029312	-	-	-	-	-	Lipids and lipid-like molecules	Prenol lipids	Terpene glycosides	-	91.1	-	-	2.3912	2.4768	1.2077	0.00768	0.0801	6.3712	4.8588	5.7573	5.4421	5.6524	5.4435	4.4528	4.434	4.3825	4.4306	5.6597	4.4037
neg_2480	3-(8-hydroxyoctyl)phenol	metab_20878	yes	up	-	neg	-	443.317	6.71415	2M-H	C14H22O2	52.3	-	-	-	-	-	-	-	-	-	-	52.3	-	-	-	1.1788	1.1521	1.0401	0.01024	0.09058	6.3149	6.0107	6.4402	6.3704	6.4173	6.4104	6.0178	6.1589	6.2394	6.0915	5.9998	5.9881
neg_2534	Majonoside R2	metab_20929	yes	up	-	neg	81534-63-6	767.459	6.7638	M-H2O-H	C41H70O14	-	72.7	HMDB0040418	-	-	-	-	-	Lipids and lipid-like molecules	Prenol lipids	Terpene glycosides	-	72.7	-	-	1.8694	1.8317	1.1482	0.04779	0.2047	5.3384	5.2869	4.8518	6.5121	6.5932	6.3276	4.8391	4.8202	5.4925	4.8169	4.9528	5.4816
neg_2559	1-nonadecanoyl-glycero-3-phosphate	metab_20951	yes	down	-	neg	-	497.289	6.80087	M+FA-H	C22H45O7P	-	76.2	HMDB0062322;LMGP10050034;HMDB0114746	-	-	-	-	-	Lipids and lipid-like molecules	Glycerophospholipids	Glycerophosphates	-	76.2	-	-	2.0756	1.9773	0.9089	0.0002118	0.01032	6.0824	5.9735	6.4505	5.8634	5.8128	5.7982	6.6085	6.6069	6.4359	6.6688	6.6456	6.6203
neg_2577	12S-HHT	metab_20968	yes	up	C20388	neg	54397-84-1	605.407	6.83888	2M+FA-H	C17H28O3	-	61.5	HMDB0012535	-	-	-	-	-	Lipids and lipid-like molecules	Fatty Acyls	Fatty acids and conjugates	-	61.5	-	-	1.399	1.3305	1.0553	0.01591	0.1137	6.4779	6.555	6.5343	6.9794	6.8651	7.004	6.3879	6.1349	6.559	6.261	6.6038	6.3518
neg_2587	1-Stearoylglycerophosphoglycerol	metab_20977	yes	down	-	neg	-	511.304	6.85497	M-H	C24H49O9P	-	89.1	HMDB0061697	-	-	-	-	-	Lipids and lipid-like molecules	Glycerophospholipids	Glycerophosphoglycerols	-	89.1	-	-	1.7518	1.6747	0.938	0.0002408	0.01093	6.5207	6.6547	6.8139	6.4258	6.4026	6.5059	7.0805	6.9969	6.7802	7.0825	7.0161	6.9684
neg_2653	2-Nonenoic acid	metab_21038	yes	up	-	neg	3760-11-0	467.338	6.9099	3M-H	C9H16O2	-	82.4	HMDB0031271	-	-	-	-	-	Lipids and lipid-like molecules	Fatty Acyls	Fatty acids and conjugates	-	82.4	-	-	1.7448	1.7431	1.1197	0.01448	0.1078	4.9227	4.9761	4.8692	4.7	5.0701	4.7593	4.4219	4.2034	4.3943	4.2056	5.0888	3.85
neg_2811	Dehydrophytosphingosine	metab_21185	yes	down	-	neg	3687-54-5	314.27	7.04802	M-H	C18H37NO3	-	73	LMSP01030002;HMDB0038057	-	-	-	-	-	Organic nitrogen compounds	Organonitrogen compounds	Amines	-	73	-	-	2.6063	2.5015	0.7649	0.003811	0.05527	3.4748	3.5129	3.9669	3.3864	3.3673	3.3766	4.1335	4.9287	4.6333	4.9891	5.3607	3.5172
neg_2813	DG(15:0/18:3(6Z,9Z,12Z)/0:0)	metab_21187	yes	up	-	neg	-	557.458	7.04802	M-H2O-H	C36H64O5	-	68.3	HMDB0007075	-	-	-	-	-	Lipids and lipid-like molecules	Fatty Acyls	Lineolic acids and derivatives	-	68.3	-	-	1.4163	1.3847	1.0638	0.01471	0.1085	6.0399	6.1154	6.0856	5.8997	6.0705	6.1075	5.7706	5.8296	5.9363	5.3395	5.3074	5.9542
neg_3580	2-Hexaprenyl-6-methoxy-1,4-benzoquinol	metab_21903	yes	up	-	neg	-	593.422	8.2971	M+FA-H	C37H56O3	-	52.2	HMDB0012148	-	-	-	-	-	Lipids and lipid-like molecules	Prenol lipids	Polyprenylphenols	-	52.2	-	-	1.5991	1.5623	1.1034	0.04727	0.2042	5.1605	6.0861	5.7724	5.5594	6.0007	5.8533	5.0299	5.2342	6.0386	4.5759	5.1817	5.1462
neg_4257	22-Angeloylbarringtogenol C	metab_22565	yes	down	-	neg	200492-43-9	553.39	7.56292	M-H2O-H	C35H56O6	-	76.9	HMDB0032835	-	-	-	-	-	Lipids and lipid-like molecules	Prenol lipids	Triterpenoids	-	76.9	-	-	2.147	2.0225	0.8329	0.04325	0.1946	5.1487	3.0846	4.9935	4.9709	4.4993	4.9948	5.9585	6.0536	5.0525	5.9658	4.5977	5.6198
neg_4540	2-Hydroxy-5 (6)Epoxy-Tetrahydrocaryophyllene	metab_22824	yes	down	-	neg	-	475.379	7.31257	2M-H	C15H26O2	50.6	-	-	-	-	-	-	-	-	-	-	50.6	-	-	-	2.5341	2.4125	0.8046	0.002004	0.03978	4.3799	4.0549	3.8594	3.8408	3.9829	3.831	4.7559	5.4572	4.9563	5.5579	4.0817	4.9493
neg_4754	DG(15:0/18:2(9Z,12Z)/0:0)	metab_23024	yes	up	-	neg	-	577.484	7.1513	M-H	C36H66O5	-	64.8	HMDB0007074	-	-	-	-	-	Lipids and lipid-like molecules	Fatty Acyls	Lineolic acids and derivatives	-	64.8	-	-	1.4749	1.4705	1.0788	0.02554	0.1469	5.5887	5.8917	5.8939	5.6295	5.7235	5.9267	5.4617	5.4368	5.7341	4.871	4.9472	5.6759
neg_4755	Echinocystic acid	metab_23025	yes	up	C08942	neg	-	471.348	7.1513	M-H	C30H48O4	60.6	-	;MJDBOTE0000948	-	-	-	-	-	-	-	-	60.6	-	-	-	1.2748	1.2028	1.042	0.01539	0.1111	7.2135	7.1547	7.1993	7.263	6.8313	7.0406	7.0085	6.7565	6.9536	6.5038	6.903	6.8532
neg_4960	Dihydroceramide	metab_23214	yes	up	C12126	neg	-	364.265	6.98703	M+Cl	C19H39NO3	-	73	HMDB0006752;HMDB0011761	-	-	map00600;map01100;map04071	Metabolism;Metabolism;Environmental Information Processing	Lipid metabolism;Global and overview maps;Signal transduction	Organic acids and derivatives	Carboxylic acids and derivatives	Carboxylic acid derivatives	-	73	Sphingolipid metabolism; Metabolic pathways; Sphingolipid signaling pathway	Sphingolipid metabolism; Metabolic pathways; Sphingolipid signaling pathway	1.2513	1.1637	1.0481	0.01621	0.1151	5.8958	6.1201	5.6793	5.7492	6.1169	5.7578	5.6949	5.4953	5.8123	5.6435	5.5265	5.5289
neg_5100	LysoPE(16:1(9Z)/0:0)	metab_23345	yes	down	-	neg	-	450.263	6.87888	M-H	C21H42NO7P	-	76.6	HMDB0011504	-	-	-	-	-	Lipids and lipid-like molecules	Glycerophospholipids	Glycerophosphoethanolamines	-	76.6	-	-	1.3993	1.3404	0.9545	0.0009576	0.02589	5.9095	5.7965	6.1118	6.1687	6.0338	5.982	6.2795	6.2423	6.1842	6.2937	6.3521	6.365
neg_5151	13'-Hydroxy-gamma-tocotrienol	metab_23391	yes	up	-	neg	-	471.312	6.83888	M+FA-H	C28H42O3	-	60.5	HMDB0012562	-	-	-	-	-	Lipids and lipid-like molecules	Prenol lipids	Quinone and hydroquinone lipids	-	60.5	-	-	1.3056	1.2576	1.0583	0.03574	0.1769	6.0954	5.8203	6.1038	5.9134	6.0233	5.968	5.8891	5.7861	5.6722	6.0092	5.158	5.4275
neg_5632	Ganoderic acid H	metab_23831	yes	up	-	neg	98665-19-1	553.284	6.46058	M-H2O-H	C32H44O9	-	82.8	HMDB0035987	-	-	-	-	-	Lipids and lipid-like molecules	Prenol lipids	Triterpenoids	-	82.8	-	-	2.1594	2.1337	1.1388	0.000557	0.01968	5.6739	5.1087	5.5733	5.5942	5.7209	5.8025	4.8849	5.2617	5.0005	4.7178	4.9216	4.6097
neg_5699	8-Hepe	metab_23891	yes	up	-	neg	-	363.218	6.40693	M+FA-H	C20H30O3	64.5	-	-	-	-	-	-	-	-	-	-	64.5	-	-	-	1.165	1.1629	1.0391	0.005517	0.06831	5.88	5.85	5.9876	6.1477	5.9701	6.1766	5.7198	5.7401	5.7297	5.7687	5.9368	5.7596
neg_5719	Leu-Leu-Leu	metab_23909	yes	down	-	neg	-	356.255	6.39555	M-H	C18H35N3O4	-	65.6	HMDB0094648	-	-	-	-	-	Organic acids and derivatives	Carboxylic acids and derivatives	Amino acids, peptides, and analogues	-	65.6	-	-	2.7252	2.6035	0.814	9.736e-05	0.006952	4.1353	4.4804	4.7969	4.3991	4.6302	4.4143	5.6	5.6329	4.9746	5.7706	5.8089	5.2098
neg_5883	Soyasaponin A1	metab_24063	yes	up	C08982	neg	78693-94-4	633.295	6.29802	M-2H	C59H96O29	-	79.9	HMDB0038606	-	-	-	-	-	Lipids and lipid-like molecules	Prenol lipids	Terpene glycosides	-	79.9	-	-	1.9663	2.012	1.1072	0.001783	0.03766	6.0259	5.8446	6.1227	6.0096	5.9975	6.3146	5.3956	5.3286	5.3796	5.4742	6.0483	5.1702
neg_6057	L-Menthyl acetoacetate	metab_24232	yes	up	-	neg	59557-05-0	285.171	6.15652	M+FA-H	C14H24O3	-	51.2	HMDB0032369	-	-	-	-	-	Lipids and lipid-like molecules	Prenol lipids	Monoterpenoids	-	51.2	-	-	1.0865	1.0367	1.0435	0.03565	0.1769	5.289	5.5255	5.9142	5.6269	5.5149	5.6486	5.4146	5.1741	5.2607	5.4267	5.3773	5.4721
neg_6085	Cyclohexanecarboxylic Acid	metab_24259	yes	up	C09822	neg	98-89-5	255.16	6.07255	2M-H	C7H12O2	78.4	-	HMDB0031342;MJDBOTE0000750	-	-	map01100;map00362;map01120	Metabolism;Metabolism;Metabolism	Global and overview maps;Xenobiotics biodegradation and metabolism;Global and overview maps	Organic acids and derivatives	Carboxylic acids and derivatives	Carboxylic acids	78.4	-	Metabolic pathways; Benzoate degradation; Microbial metabolism in diverse environments	Metabolic pathways; Benzoate degradation; Microbial metabolism in diverse environments	1.6509	1.5802	1.1038	0.01735	0.1183	4.9181	5.233	5.8184	5.2544	5.0531	5.2999	4.8983	4.6601	5.1409	4.6189	4.318	4.9704
neg_6285	Valyl-Valine	metab_24458	yes	down	-	neg	-	215.14	4.98378	M-H	C10H20N2O3	-	63.4	HMDB0029140	-	-	-	-	-	Organic acids and derivatives	Carboxylic acids and derivatives	Amino acids, peptides, and analogues	-	63.4	-	-	1.4402	1.3771	0.9378	0.01184	0.09621	5.4512	5.5731	5.3953	5.2931	5.7438	5.7611	6.0087	5.8919	5.4772	6.067	6.065	5.9056
neg_6501	Isoleucyl-Threonine	metab_24674	yes	down	-	neg	-	231.135	3.81317	M-H	C10H20N2O4	-	57.8	HMDB0028917	-	-	-	-	-	Organic acids and derivatives	Carboxylic acids and derivatives	Amino acids, peptides, and analogues	-	57.8	-	-	1.5357	1.4926	0.9248	0.0133	0.103	5.2004	5.5066	5.3379	4.8598	5.3209	5.3577	5.7405	5.5656	5.3664	5.9718	6.0321	5.4742
neg_6704	N-Acetyl-DL-methionine	metab_24875	yes	down	-	neg	-	190.054	2.83172	M-H	C7H13NO3S	85.6	-	-	-	-	-	-	-	-	-	-	85.6	-	-	-	1.7901	1.6896	0.9226	0.0004555	0.01725	5.435	5.4542	5.5714	5.2551	5.1723	5.3628	5.6284	5.9712	5.8489	5.931	5.9559	5.6232
neg_6718	Serylisoleucine	metab_24889	yes	down	-	neg	91086-51-0	217.119	2.74935	M-H	C9H18N2O4	-	82	HMDB0029042	-	-	-	-	-	Organic acids and derivatives	Carboxylic acids and derivatives	Amino acids, peptides, and analogues	-	82	-	-	1.4897	1.4407	0.9325	0.00898	0.08488	5.213	5.4181	5.3202	5.1071	5.3125	5.4716	5.7179	5.5665	5.3413	5.9532	6.0174	5.5483
neg_6784	Xanthosine	metab_24954	yes	down	C01762	neg	146-80-5	283.068	2.2867	M-H	C10H12N4O6	90	-	HMDB0000299	-	-	map01100;map01110;map00230;map00232;map02010;map01065	Metabolism;Metabolism;Metabolism;Metabolism;Environmental Information Processing;Metabolism	Global and overview maps;Global and overview maps;Nucleotide metabolism;Biosynthesis of other secondary metabolites;Membrane transport;Chemical structure transformation maps	Nucleosides, nucleotides, and analogues	Purine nucleosides	Not Available	90	-	Metabolic pathways; Biosynthesis of secondary metabolites; Purine metabolism; Caffeine metabolism; ABC transporters; Biosynthesis of alkaloids derived from histidine and purine	Metabolic pathways; Biosynthesis of secondary metabolites; Purine metabolism; Caffeine metabolism; ABC transporters; Biosynthesis of alkaloids derived from histidine and purine	3.2247	3.0387	0.7659	2.731e-05	0.003401	4.5728	3.8779	4.8044	4.5406	4.4136	4.3668	5.3203	5.9181	5.5029	5.8598	6.2759	5.8191
neg_6964	4-Acetyl-2(3H)-benzoxazolone	metab_25133	yes	up	-	neg	70735-79-4	222.041	0.94805	M+FA-H	C9H7NO3	-	61.3	HMDB0040612	-	-	-	-	-	Organoheterocyclic compounds	Benzoxazoles	Benzoxazolones	-	61.3	-	-	2.242	2.1231	1.1224	1.707e-06	0.0009855	5.7718	5.8328	5.8256	5.8837	5.7421	5.7747	5.3113	4.9102	5.2288	5.1258	5.1613	5.2955
neg_7014	Gamma-Glu-Leu	metab_25180	yes	down	-	neg	-	259.13	0.781083	M-H	C11H20N2O5	64.5	-	HMDB0011171	-	-	-	-	-	Organic acids and derivatives	Carboxylic acids and derivatives	Amino acids, peptides, and analogues	64.5	-	-	-	1.1948	1.1693	0.9508	0.0271	0.1516	5.3616	5.706	5.6006	5.2856	5.5568	5.5489	5.8951	5.7058	5.4407	6.0075	6.0087	5.7115
neg_7054	P-Salicylic acid	metab_25220	yes	up	C00156	neg	-	137.024	0.7628	M-H	C7H6O3	57.1	-	HMDB0000500	-	-	map01100;map01220;map01110;map01120;map00627;map00130;map00623;map00363;map00362;map00790;map07110;map01061	Metabolism;Metabolism;Metabolism;Metabolism;Metabolism;Metabolism;Metabolism;Metabolism;Metabolism;Metabolism;Drug Development;Metabolism	Global and overview maps;Global and overview maps;Global and overview maps;Global and overview maps;Xenobiotics biodegradation and metabolism;Metabolism of cofactors and vitamins;Xenobiotics biodegradation and metabolism;Xenobiotics biodegradation and metabolism;Xenobiotics biodegradation and metabolism;Metabolism of cofactors and vitamins;Skeleton-based classification;Chemical structure transfor…	Benzenoids	Benzene and substituted derivatives	Benzoic acids and derivatives	57.1	-	Metabolic pathways; Degradation of aromatic compounds; Biosynthesis of secondary metabolites; Microbial metabolism in diverse environments; Aminobenzoate degradation; Ubiquinone and other terpenoid-quinone biosynthesis; Toluene degradation; Bisphenol degradation; Benzoate degradation; Folate biosynthesis; Benzoic acid family; Biosynthesis of phenylpropanoids	Metabolic pathways; Degradation of aromatic compounds; Biosynthesis of secondary metabolites; Microbial metabolism in diverse environments; Aminobenzoate degradation; Ubiquinone and other terpenoid-quinone biosynthesis; Toluene degradation; Bisphenol degradation; Benzoate degradation; Folate biosynthesis; Benzoic acid family; Biosynthesis of phenylpropanoids	1.1702	1.121	1.0534	0.02847	0.1557	4.8368	5.1099	5.0033	5.0156	5.3148	5.3942	5.0524	4.7471	4.9567	4.7717	4.7067	4.8841
neg_7082	DTMP	metab_25248	yes	down	C00364	neg	-	321.049	0.755317	M-H	C10H15N2O8P	60.3	-	HMDB0001227	Nucleic acids	Nucleotides	map00240;map01100;map01523	Metabolism;Metabolism;Human Diseases	Nucleotide metabolism;Global and overview maps;Drug resistance: antineoplastic	Nucleosides, nucleotides, and analogues	Pyrimidine nucleotides	Pyrimidine deoxyribonucleotides	60.3	-	Pyrimidine metabolism; Metabolic pathways; Antifolate resistance	Pyrimidine metabolism; Metabolic pathways; Antifolate resistance	3.0207	2.8583	0.742	0.005045	0.06451	3.9377	2.8795	4.5428	4.6667	4.3951	4.7834	5.7947	5.2529	4.4372	5.9908	6.2217	6.2764
neg_7112	Glutamylvaline	metab_25278	yes	down	-	neg	5879-06-01	245.114	0.751817	M-H	C10H18N2O5	-	50.2	HMDB0028832	-	-	-	-	-	Organic acids and derivatives	Carboxylic acids and derivatives	Amino acids, peptides, and analogues	-	50.2	-	-	1.0543	1.0386	0.9612	0.03059	0.1619	5.5506	5.8615	5.7193	5.5586	5.7351	5.6478	6.0141	5.8333	5.6192	6.0838	6.0952	5.7997
neg_7120	Orotic acid	metab_25286	yes	down	C00295	neg	65-86-1	155.009	0.751817	M-H	C5H4N2O4	64.6	-	HMDB0000226	-	-	map00240;map01100	Metabolism;Metabolism	Nucleotide metabolism;Global and overview maps	Organoheterocyclic compounds	Diazines	Pyrimidines and pyrimidine derivatives	64.6	-	Pyrimidine metabolism; Metabolic pathways	Pyrimidine metabolism; Metabolic pathways	1.9752	1.8864	0.8807	0.001002	0.02641	4.3308	4.5314	4.0459	4.2117	4.3164	4.2933	4.999	5.0005	4.3355	5.0435	4.8949	4.9424
neg_7174	L-Arginine	metab_25338	yes	up	C00062	neg	74-79-3	173.104	0.722983	M-H	C6H14N4O2	69.3	-	HMDB0000517;HMDB0062762;MJDBOTE0000532	Peptides	Amino acids	map01100;map00220;map00997;map05014;map05146;map00472;map02010;map00330;map00331;map01230;map01110;map04974;map00970;map00261;map05142;map05230;map01064;map04150;map01060	Metabolism;Metabolism;Metabolism;Human Diseases;Human Diseases;Metabolism;Environmental Information Processing;Metabolism;Metabolism;Metabolism;Metabolism;Organismal Systems;Genetic Information Processing;Metabolism;Human Diseases;Human Diseases;Metabolism;Environmental Information Processing;Metabolism	Global and overview maps;Amino acid metabolism;Biosynthesis of other secondary metabolites;Neurodegenerative disease;Infectious disease: parasitic;Metabolism of other amino acids;Membrane transport;Amino acid metabolism;Biosynthesis of other secondary metabolites;Global and overview maps;Global and overview maps;Digestive system;Translation;Biosynthesis of other secondary metabolites;Infectious d…	Organic acids and derivatives	Carboxylic acids and derivatives	Amino acids, peptides, and analogues	69.3	-	Metabolic pathways; Arginine biosynthesis; Biosynthesis of various secondary metabolites - part 3; Amyotrophic lateral sclerosis (ALS); Amoebiasis; D-Arginine and D-ornithine metabolism; ABC transporters; Arginine and proline metabolism; Clavulanic acid biosynthesis; Biosynthesis of amino acids; Biosynthesis of secondary metabolites; Protein digestion and absorption; Aminoacyl-tRNA biosynthesis; …	Metabolic pathways; Arginine biosynthesis; Biosynthesis of various secondary metabolites - part 3; Amyotrophic lateral sclerosis (ALS); Amoebiasis; D-Arginine and D-ornithine metabolism; ABC transporters; Arginine and proline metabolism; Clavulanic acid biosynthesis; Biosynthesis of amino acids; Biosynthesis of secondary metabolites; Protein digestion and absorption; Aminoacyl-tRNA biosynthesis; …	1.3943	1.3333	1.0764	0.01921	0.1253	4.8695	5.3622	5.1037	4.8684	5.047	5.1721	4.6775	4.8538	5.1214	4.3762	4.5902	4.6469
neg_7370	D,L-3,4-Dihydroxymandelic acid	metab_25528	yes	down	-	neg	-	165.019	0.623583	M-H2O-H	C8H8O5	58.6	-	-	-	-	-	-	-	-	-	-	58.6	-	-	-	1.0692	1.0584	0.9524	0.04937	0.2092	4.99	4.4562	4.7773	4.9267	4.6151	4.6918	4.9166	4.9856	4.7835	5.1502	5.2042	4.8413
neg_7374	2-hydroxyflutamide	metab_25532	yes	down	C14204	neg	-	337.063	0.619117	M+FA-H	C11H11F3N2O4	-	57	HMDB0060949	-	-	-	-	-	Benzenoids	Benzene and substituted derivatives	Trifluoromethylbenzenes	-	57	-	-	2.9309	2.8548	0.7501	0.000134	0.008564	2.98	4.1146	3.5469	3.3707	3.624	3.8882	5.1517	4.761	4.3591	5.0184	4.5975	4.8054
neg_7375	DCMP	metab_25533	yes	down	C00239	neg	1032-65-1	306.05	0.619117	M-H	C9H14N3O7P	68.7	-	HMDB0001202	Nucleic acids	Nucleotides	map00240;map01100	Metabolism;Metabolism	Nucleotide metabolism;Global and overview maps	Nucleosides, nucleotides, and analogues	Pyrimidine nucleotides	Pyrimidine deoxyribonucleotides	68.7	-	Pyrimidine metabolism; Metabolic pathways	Pyrimidine metabolism; Metabolic pathways	2.7942	2.6442	0.7691	0.002013	0.03984	3.8958	3.8174	3.7401	4.2617	3.7326	4.2098	5.0071	4.7018	4.0762	5.5516	5.7956	5.6272
neg_7478	Methylphosphate	metab_25634	yes	down	-	neg	812-00-0	110.985	0.563467	M-H	CH5O4P	-	51	HMDB0061711	-	-	-	-	-	Organic acids and derivatives	Organic phosphoric acids and derivatives	Phosphate esters	-	51	-	-	2.1931	2.1041	0.8228	0.008378	0.0823	3.3267	3.8121	3.492	4.0141	4.1222	4.2444	4.9679	4.3983	3.7916	4.9884	5.1356	4.6869
neg_7482	D-Myoinositol 4-phosphate	metab_25638	yes	down	C03546	neg	-	259.022	0.559783	M-H	C6H13O9P	66.3	-	HMDB0001313	-	-	map01100;map04070;map00562	Metabolism;Environmental Information Processing;Metabolism	Global and overview maps;Signal transduction;Carbohydrate metabolism	Organic oxygen compounds	Organooxygen compounds	Alcohols and polyols	66.3	-	Metabolic pathways; Phosphatidylinositol signaling system; Inositol phosphate metabolism	Metabolic pathways; Phosphatidylinositol signaling system; Inositol phosphate metabolism	3.3785	3.2196	0.7251	3.255e-05	0.003504	4.1675	3.856	3.9938	4.1246	3.9548	4.035	5.8748	5.7942	4.5857	6.0017	5.5971	5.4295
neg_7486	Glycerol 3-phosphate	metab_25642	yes	down	C00093	neg	1957-03-04	171.006	0.559783	M-H	C3H9O6P	64.2	-	HMDB0000126	-	-	map01100;map00564;map01110;map00561;map02010;map05231	Metabolism;Metabolism;Metabolism;Metabolism;Environmental Information Processing;Human Diseases	Global and overview maps;Lipid metabolism;Global and overview maps;Lipid metabolism;Membrane transport;Cancer: overview	Lipids and lipid-like molecules	Glycerophospholipids	Glycerophosphates	64.2	-	Metabolic pathways; Glycerophospholipid metabolism; Biosynthesis of secondary metabolites; Glycerolipid metabolism; ABC transporters; Choline metabolism in cancer	Metabolic pathways; Glycerophospholipid metabolism; Biosynthesis of secondary metabolites; Glycerolipid metabolism; ABC transporters; Choline metabolism in cancer	2.4902	2.3765	0.7625	0.009022	0.08515	2.6833	3.3611	3.2643	3.6336	3.5991	3.816	4.3515	4.3395	3.2885	5.2758	5.0493	4.3972
neg_81	L-Glutamate	metab_25712	yes	down	C00025	neg	-	146.045	0.598417	M-H2O-H, M-H	C5H9NO4	80	-	HMDB0000148;HMDB0003339;HMDB0060475	Peptides;Hormones and transmitters	Amino acids;Neurotransmitters	map00997;map01200;map00330;map00480;map00332;map04742;map00250;map05033;map04974;map04072;map04216;map00630;map00430;map04964;map00471;map02010;map00860;map04080;map05016;map05017;map05014;map04727;map01064;map04723;map05031;map04721;map01060;map01100;map00220;map04540;map01120;map01210;map00340;map00524;map01230;map04068;map05034;map01110;map00660;map04724;map05030;map00650;map00910;map02020;map…	Metabolism;Metabolism;Metabolism;Metabolism;Metabolism;Organismal Systems;Metabolism;Human Diseases;Organismal Systems;Environmental Information Processing;Cellular Processes;Metabolism;Metabolism;Organismal Systems;Metabolism;Environmental Information Processing;Metabolism;Environmental Information Processing;Human Diseases;Human Diseases;Human Diseases;Organismal Systems;Metabolism;Organismal S…	Biosynthesis of other secondary metabolites;Global and overview maps;Amino acid metabolism;Metabolism of other amino acids;Biosynthesis of other secondary metabolites;Sensory system;Amino acid metabolism;Substance dependence;Digestive system;Signal transduction;Cell growth and death;Carbohydrate metabolism;Metabolism of other amino acids;Excretory system;Metabolism of other amino acids;Membrane t…	Organic acids and derivatives	Carboxylic acids and derivatives	Amino acids, peptides, and analogues	80	-	Biosynthesis of various secondary metabolites - part 3; Carbon metabolism; Arginine and proline metabolism; Glutathione metabolism; Carbapenem biosynthesis; Taste transduction; Alanine, aspartate and glutamate metabolism; Nicotine addiction; Protein digestion and absorption; Phospholipase D signaling pathway; Ferroptosis; Glyoxylate and dicarboxylate metabolism; Taurine and hypotaurine metabolism…	Biosynthesis of various secondary metabolites - part 3; Carbon metabolism; Arginine and proline metabolism; Glutathione metabolism; Carbapenem biosynthesis; Taste transduction; Alanine, aspartate and glutamate metabolism; Nicotine addiction; Protein digestion and absorption; Phospholipase D signaling pathway; Ferroptosis; Glyoxylate and dicarboxylate metabolism; Taurine and hypotaurine metabolism…	1.8455	1.7799	0.935	8.731e-06	0.001811	6.4121	6.5424	6.4116	6.3037	6.4144	6.4032	6.9783	6.9694	6.7071	6.8843	6.7676	6.8586
neg_1297	Ne-Acetyllysine	metab_25715	yes	down	C02727	neg	-	187.108	3.23605	M-H	C8H16N2O3	74.3	-	HMDB0000197;HMDB0000206	-	-	map01100;map00310	Metabolism;Metabolism	Global and overview maps;Amino acid metabolism	Organoheterocyclic compounds	Indoles and derivatives	Indolyl carboxylic acids and derivatives	74.3	-	Metabolic pathways; Lysine degradation	Metabolic pathways; Lysine degradation	2.0249	1.9597	0.881	0.003133	0.04944	4.773	4.957	4.887	4.4985	4.9244	4.9268	5.4477	5.542	4.9954	5.8432	5.929	5.1205
pos_273	4-Pyridoxate	metab_272	yes	up	C00847	pos	-	166.05	2.67265	M+H-H2O, 2M+H, M+Na	C8H9NO4	82.3	-	HMDB0000017	-	-	map01100;map00750;map01120	Metabolism;Metabolism;Metabolism	Global and overview maps;Metabolism of cofactors and vitamins;Global and overview maps	Organoheterocyclic compounds	Pyridines and derivatives	Pyridinecarboxylic acids and derivatives	82.3	-	Metabolic pathways; Vitamin B6 metabolism; Microbial metabolism in diverse environments	Metabolic pathways; Vitamin B6 metabolism; Microbial metabolism in diverse environments	1.5241	1.4325	1.0929	0.01035	0.07383	5.1093	4.9206	4.9312	5.3439	5.3749	5.3119	4.8147	4.331	4.5621	4.6376	4.9147	5.0938
pos_490	LysoPC(22:6(4Z,7Z,10Z,13Z,16Z,19Z))	metab_489	yes	down	C04230	pos	-	568.339	6.63412	M+H, M+Na, M+H-H2O	C30H50NO7P	-	88	HMDB0010404	Lipids	Phospholipids	map00564;map05231	Metabolism;Human Diseases	Lipid metabolism;Cancer: overview	Lipids and lipid-like molecules	Glycerophospholipids	Glycerophosphocholines	-	88	Glycerophospholipid metabolism; Choline metabolism in cancer	Glycerophospholipid metabolism; Choline metabolism in cancer	1.9478	1.8705	0.9105	0.003927	0.04542	6.7492	6.6677	7.3983	7.076	6.6965	7.0953	7.2636	7.5797	7.3128	7.9752	8.1003	7.5481
pos_692	C-2 Ceramide	metab_688	yes	down	-	pos	-	306.279	6.91355	M+H, M+Na, M+H-2H2O	C20H39NO3	88.8	-	-	-	-	-	-	-	-	-	-	88.8	-	-	-	1.8077	1.7476	0.9158	0.0004798	0.0151	6.0151	5.8703	6.0592	5.8468	5.8195	5.7507	6.2559	6.6074	6.4485	6.6848	6.5516	6.0691
pos_694	Withanolide B	metab_690	yes	down	C00828	pos	56973-41-2	455.276	6.8967	M+H, M+Na, M+H-H2O	C28H38O5	-	67.2	HMDB0030020	Vitamins and Cofactors	Vitamins	map01100;map00130;map01110;map04977;map02020	Metabolism;Metabolism;Metabolism;Organismal Systems;Environmental Information Processing	Global and overview maps;Metabolism of cofactors and vitamins;Global and overview maps;Digestive system;Signal transduction	Lipids and lipid-like molecules	Prenol lipids	Quinone and hydroquinone lipids	-	67.2	Metabolic pathways; Ubiquinone and other terpenoid-quinone biosynthesis; Biosynthesis of secondary metabolites; Vitamin digestion and absorption; Two-component system	Metabolic pathways; Ubiquinone and other terpenoid-quinone biosynthesis; Biosynthesis of secondary metabolites; Vitamin digestion and absorption; Two-component system	2.5044	2.5325	0.7865	0.007654	0.06377	4.7177	4.6372	4.5722	4.6057	4.4975	4.5156	6.3223	6.5108	6.9076	5.74	4.9308	4.6095
pos_1383	PC(4:0/0:0)	metab_1369	yes	down	-	pos	-	328.151	3.19155	M+H, M+Na	C12H26NO7P	51.8	-	LMGP01050061	-	-	-	-	-	-	-	-	51.8	-	-	-	2.7492	2.6157	0.8079	5.603e-05	0.004467	4.6281	4.7825	5.4541	4.6747	4.5278	4.8465	6.0343	6.0976	5.801	6.2557	6.0736	5.5254
pos_1459	1,5-dihydroxy-2,3-dimethoxy-10-methylacridin-9-one	metab_1445	yes	down	-	pos	-	334.128	3.57053	M+NH4, M+CH3OH+H	C16H15NO5	58.6	-	-	-	-	-	-	-	-	-	-	58.6	-	-	-	2.1439	2.0942	0.8459	0.001208	0.02471	4.9521	4.7248	4.5372	4.4164	3.9902	4.0919	5.3509	5.4619	4.94	5.4318	5.4465	4.9468
pos_1727	Methyl 5-hydroxyoxindole-3-acetate	metab_1711	yes	up	-	pos	-	222.076	5.16098	M+H, M+Na	C11H11NO4	56.3	-	HMDB0038990	-	-	-	-	-	Organoheterocyclic compounds	Indoles and derivatives	Indolyl carboxylic acids and derivatives	56.3	-	-	-	1.9473	1.8859	1.1184	0.001137	0.02385	6.1116	6.105	6.0713	5.938	6.1092	6.0507	5.5421	5.3178	5.9072	5.106	5.0033	5.6527
pos_1768	N-[2-hydroxy-2-(4-hydroxy-3-methoxyphenyl)ethyl]-3-(4-hydroxy-3-methoxyphenyl)prop-2-enimidic acid	metab_1752	yes	up	-	pos	-	342.133	5.41558	M+H-H2O, M+NH4	C19H21NO6	-	69.6	HMDB0136453	-	-	-	-	-	Phenylpropanoids and polyketides	Cinnamic acids and derivatives	Hydroxycinnamic acids and derivatives	-	69.6	-	-	1.7649	1.6846	1.1165	0.005663	0.05419	5.2056	5.0199	5.345	5.4994	5.4385	5.581	4.8342	4.3845	5.2697	4.6315	4.5593	5.0595
pos_1882	4-[formyl-(6-methoxyquinolin-8-yl)amino]pentanoic acid	metab_1865	yes	down	-	pos	-	303.133	6.05732	M+H, M+CH3OH+H	C16H18N2O4	56.6	-	-	-	-	-	-	-	-	-	-	56.6	-	-	-	1.4738	1.3895	0.941	0.002299	0.03475	5.847	5.783	6.0572	5.7681	5.7817	5.8689	6.4311	6.404	6.0425	6.2856	5.9514	6.1956
pos_2043	3-(10-Heptadecenyl)phenol	metab_2025	yes	up	-	pos	111047-33-7	363.336	6.42107	M+H-H2O, M+CH3OH+H	C23H38O	-	59.9	HMDB0038525	-	-	-	-	-	Benzenoids	Phenols	1-hydroxy-4-unsubstituted benzenoids	-	59.9	-	-	1.2703	1.2367	1.0603	0.01449	0.08775	6.0124	5.8665	5.7834	5.5053	5.5321	5.4611	5.2345	5.4623	5.5736	5.454	5.2574	5.2349
pos_2145	PE(18:1(9Z)/0:0)	metab_2121	yes	down	-	pos	-	480.308	6.8776	M+H, M+Na	C23H46NO7P	87.1	-	LMGP02050004	-	-	-	-	-	-	-	-	87.1	-	-	-	1.8181	1.7508	0.9222	0.0003494	0.01296	6.2763	5.9808	6.5034	6.4928	6.3452	6.5114	6.8107	6.8732	6.6714	6.9163	6.9904	7.0653
pos_2148	PI(16:0/18:1(11Z))	metab_2124	yes	up	-	pos	-	854.583	6.88292	M+NH4, M+Na	C43H81O13P	-	75.6	HMDB0009782	-	-	-	-	-	Lipids and lipid-like molecules	Glycerophospholipids	Glycerophosphoinositols	-	75.6	-	-	2.8463	2.7644	1.2935	3.017e-09	2.088e-06	5.1742	5.1818	4.7948	5.0856	5.0373	5.0312	3.9668	3.9205	3.8863	3.8991	3.8728	3.8848
pos_2845	Linoelaidic Acid	metab_2775	yes	up	C01595	pos	506-21-8	281.247	7.29913	M+H-2H2O, M+H	C18H32O2	66.9	-	HMDB0006270;LMFA01030123;HMDB0000673	Lipids	Fatty acids	map01100;map00591;map01040;map01060	Metabolism;Metabolism;Metabolism;Metabolism	Global and overview maps;Lipid metabolism;Lipid metabolism;Chemical structure transformation maps	Lipids and lipid-like molecules	Fatty Acyls	Lineolic acids and derivatives	66.9	-	Metabolic pathways; Linoleic acid metabolism; Biosynthesis of unsaturated fatty acids; Biosynthesis of plant secondary metabolites	Metabolic pathways; Linoleic acid metabolism; Biosynthesis of unsaturated fatty acids; Biosynthesis of plant secondary metabolites	1.3204	1.2914	1.0596	9.506e-05	0.006036	5.0572	4.9835	5.0291	4.9826	4.9825	5.0338	4.7699	4.8124	4.7336	4.5937	4.6122	4.8526
pos_2877	3-hydroxyundecanoyl carnitine	metab_2806	yes	down	-	pos	-	363.289	7.19457	M+H-2H2O, M+NH4	C18H35NO5	-	51.8	HMDB0061637	-	-	-	-	-	Lipids and lipid-like molecules	Fatty Acyls	Fatty acid esters	-	51.8	-	-	1.1666	1.1934	0.948	0.01319	0.08349	5.8633	5.7665	5.4932	5.9501	5.6046	5.5848	6.1692	5.9235	5.7813	6.2598	6.099	5.9039
pos_2899	C14-homoserine lactone	metab_2825	yes	up	-	pos	-	312.253	7.13598	M+H, M+Na	C18H33NO3	83	-	-	-	-	-	-	-	-	-	-	83	-	-	-	1.5465	1.5287	1.0932	0.006228	0.05738	5.2287	5.318	5.3362	5.4567	5.5026	5.6123	5.0959	4.8903	5.1455	4.836	4.4439	5.2752
pos_3178	LysoPC(20:4(8Z,11Z,14Z,17Z))	metab_3099	yes	down	C04230	pos	-	566.321	6.6754	M+Na, M+K	C28H50NO7P	-	87.7	HMDB0010396	Lipids	Phospholipids	map00564;map05231	Metabolism;Human Diseases	Lipid metabolism;Cancer: overview	Lipids and lipid-like molecules	Glycerophospholipids	Glycerophosphocholines	-	87.7	Glycerophospholipid metabolism; Choline metabolism in cancer	Glycerophospholipid metabolism; Choline metabolism in cancer	2.3679	2.262	0.8485	0.004775	0.05005	5.2003	4.8889	6.247	6.3752	5.7566	6.1214	6.4179	6.9274	6.4217	6.9408	7.3386	6.7187
pos_3317	PC(20:5(5Z,8Z,11Z,14Z,17Z)/0:0)	metab_3231	yes	down	-	pos	-	542.323	6.52058	M+H, M+Na	C28H48NO7P	50.9	-	LMGP01050050	-	-	-	-	-	-	-	-	50.9	-	-	-	2.0619	1.9828	0.8895	0.003475	0.04303	5.9962	5.6887	6.5375	6.4326	5.8985	6.4371	6.5528	6.9336	6.553	7.2586	7.3922	6.8966
pos_3340	Harderoporphyrinogen	metab_3254	yes	up	-	pos	42607-18-1	615.314	6.45857	M+H-H2O, M+H	C35H42N4O6	-	53.6	HMDB0002160	-	-	-	-	-	Organoheterocyclic compounds	Tetrapyrroles and derivatives	Porphyrins	-	53.6	-	-	1.9387	2.0247	1.2223	0.02754	0.1233	5.7379	5.9328	5.477	3.8526	5.532	4.9059	4.4288	5.1308	4.2514	3.8198	3.7918	4.2969
pos_3371	Behenic acid	metab_3285	yes	up	C08281	pos	112-85-6	358.367	6.45257	M+NH4, M+K	C22H44O2	-	62.4	LMFA01010022;HMDB0000944	Lipids	Fatty acids	map00073;map01040	Metabolism;Metabolism	Lipid metabolism;Lipid metabolism	Lipids and lipid-like molecules	Fatty Acyls	Fatty acids and conjugates	-	62.4	Cutin, suberine and wax biosynthesis; Biosynthesis of unsaturated fatty acids	Cutin, suberine and wax biosynthesis; Biosynthesis of unsaturated fatty acids	1.1391	1.1325	1.0551	0.02984	0.129	5.8152	6.1537	5.6756	5.6127	6.083	6.0426	5.596	5.3665	5.6832	5.3514	5.7155	5.8232
pos_3607	Peiminine	metab_3519	yes	up	C10808	pos	-	430.33	6.12668	M+H-H2O, M+H	C27H43NO3	52.7	-	;MJDBOTE0001241	-	-	-	-	-	-	-	-	52.7	-	-	-	1.7535	1.736	1.0856	0.0003318	0.01253	6.5418	6.1416	6.1428	6.321	6.2208	6.0692	5.8216	5.8894	5.4677	5.7342	5.8096	5.767
pos_4004	Methyl N-butyrylglycine	metab_3912	yes	down	-	pos	-	160.097	3.33568	M+H-H2O, M+H	C7H13NO3	60.2	-	-	-	-	-	-	-	-	-	-	60.2	-	-	-	1.0658	1.1229	0.9462	0.043	0.1594	5.0404	4.9621	4.9243	4.9388	4.9637	4.917	5.2565	5.1218	4.9927	5.5469	5.6256	4.8973
pos_4112	4,6-dihydroxy-3-methyl-2,3-dihydroisoindol-1-one	metab_4019	yes	up	-	pos	-	162.055	2.86117	M+H-H2O, M+H	C9H9NO3	64.4	-	-	-	-	-	-	-	-	-	-	64.4	-	-	-	1.8623	1.7754	1.0953	0.0002622	0.01114	6.2653	6.2082	6.2764	6.4658	6.2969	6.3539	5.8566	5.6154	5.8865	5.3782	5.821	6.0126
pos_4144	4-Pyridoxic acid	metab_4051	yes	up	C00847	pos	82-82-6	184.06	2.67265	M+H-2H2O, M+H	C8H9NO4	97.6	-	HMDB0000017	-	-	map01100;map00750;map01120	Metabolism;Metabolism;Metabolism	Global and overview maps;Metabolism of cofactors and vitamins;Global and overview maps	Organoheterocyclic compounds	Pyridines and derivatives	Pyridinecarboxylic acids and derivatives	97.6	-	Metabolic pathways; Vitamin B6 metabolism; Microbial metabolism in diverse environments	Metabolic pathways; Vitamin B6 metabolism; Microbial metabolism in diverse environments	1.3856	1.32	1.0601	0.004532	0.04883	6.0666	5.9228	6.1491	6.0882	6.0395	6.0208	5.9432	5.4208	5.4931	5.8065	5.6537	5.9111
pos_4448	Uracil	metab_4351	yes	down	C00106	pos	66-22-8	113.035	1.14002	M+H-H2O, M+H	C4H4N2O2	86.9	-	HMDB0000300	Nucleic acids	Bases	map00240;map01100;map00770;map00410	Metabolism;Metabolism;Metabolism;Metabolism	Nucleotide metabolism;Global and overview maps;Metabolism of cofactors and vitamins;Metabolism of other amino acids	Organoheterocyclic compounds	Diazines	Pyrimidines and pyrimidine derivatives	86.9	-	Pyrimidine metabolism; Metabolic pathways; Pantothenate and CoA biosynthesis; beta-Alanine metabolism	Pyrimidine metabolism; Metabolic pathways; Pantothenate and CoA biosynthesis; beta-Alanine metabolism	1.0703	1.031	0.9712	0.0002511	0.011	6.2949	6.2923	6.2043	6.1868	6.2305	6.1703	6.4034	6.4334	6.3245	6.4403	6.5087	6.3788
pos_4581	Xanthine	metab_4484	yes	down	C00385	pos	69-89-6	153.041	1.43585	M+H, M+Na	C5H4N4O2	79.9	-	HMDB0000292	-	-	map01100;map01110;map00230;map01120;map00232;map01065;map01060	Metabolism;Metabolism;Metabolism;Metabolism;Metabolism;Metabolism;Metabolism	Global and overview maps;Global and overview maps;Nucleotide metabolism;Global and overview maps;Biosynthesis of other secondary metabolites;Chemical structure transformation maps;Chemical structure transformation maps	Organoheterocyclic compounds	Imidazopyrimidines	Purines and purine derivatives	79.9	-	Metabolic pathways; Biosynthesis of secondary metabolites; Purine metabolism; Microbial metabolism in diverse environments; Caffeine metabolism; Biosynthesis of alkaloids derived from histidine and purine; Biosynthesis of plant secondary metabolites	Metabolic pathways; Biosynthesis of secondary metabolites; Purine metabolism; Microbial metabolism in diverse environments; Caffeine metabolism; Biosynthesis of alkaloids derived from histidine and purine; Biosynthesis of plant secondary metabolites	1.4647	1.393	0.9493	0.0003938	0.0136	6.5354	6.6136	6.4309	6.2235	6.4052	6.3209	6.726	6.788	6.6646	6.777	6.8973	6.7365
pos_4925	L-Azetidine 2-carboxylic acid	metab_4810	yes	down	C08267	pos	-	102.055	0.688	M+H	C4H7NO2	84.6	-	HMDB0029615	-	-	-	-	-	Organic acids and derivatives	Carboxylic acids and derivatives	Amino acids, peptides, and analogues	84.6	-	-	-	1.3555	1.3007	0.9551	4.397e-06	0.0009367	5.715	5.7561	5.6917	5.6859	5.6776	5.687	6.0374	6.0491	5.8714	5.9648	5.924	5.9744
pos_4930	2-Pyrrolidinone	metab_4813	yes	down	C11118	pos	616-45-5	86.0605	0.694967	M+H	C4H7NO	68.6	-	HMDB0002039	-	-	-	-	-	Organoheterocyclic compounds	Pyrrolidines	Pyrrolidones	68.6	-	-	-	1.0103	1.035	0.9544	0.01768	0.09742	4.8493	4.7156	4.7791	4.8066	4.7644	4.703	4.8831	4.8845	4.8635	5.215	5.2687	4.8747
pos_5053	Alanyl-Proline	metab_4920	yes	down	-	pos	-	187.108	0.807267	M+H	C8H14N2O3	53.9	-	HMDB0028695	-	-	-	-	-	Organic acids and derivatives	Carboxylic acids and derivatives	Amino acids, peptides, and analogues	53.9	-	-	-	1.7007	1.6191	0.9284	9.694e-05	0.006127	5.6941	5.7974	5.791	5.6822	5.8102	5.7844	6.1314	6.1792	5.9927	6.368	6.4307	6.1192
pos_5067	N-Carbamoylsarcosine	metab_4931	yes	down	C01043	pos	-	133.061	0.814533	M+H	C4H8N2O3	53.4	-	HMDB0012265	-	-	map01100;map00330	Metabolism;Metabolism	Global and overview maps;Amino acid metabolism	Organic acids and derivatives	Carboxylic acids and derivatives	Amino acids, peptides, and analogues	53.4	-	Metabolic pathways; Arginine and proline metabolism	Metabolic pathways; Arginine and proline metabolism	1.4499	1.3469	0.9145	0.01111	0.07641	4.0107	4.3713	4.4967	3.9555	3.9117	4.0788	4.6197	4.5613	4.161	4.7066	4.5549	4.5403
pos_5363	MJAW00197	metab_5208	yes	up	-	pos	-	225.123	1.26248	M+NH4	C11H13NO3	60.3	-	;MJAW00197	-	-	-	-	-	-	-	-	60.3	-	-	-	1.2006	1.162	1.0499	0.003516	0.04303	5.6467	5.6816	5.7356	5.463	5.4718	5.5775	5.4132	5.3402	5.5373	5.2703	5.178	5.2425
pos_6099	2-Deoxyribose	metab_5905	yes	up	C01801	pos	533-67-5	176.092	3.07345	M+ACN+H	C5H10O4	69.4	-	HMDB0003224	Carbohydrates	Monosaccharides	map01100;map00030	Metabolism;Metabolism	Global and overview maps;Carbohydrate metabolism	Organic oxygen compounds	Organooxygen compounds	Carbohydrates and carbohydrate conjugates	69.4	-	Metabolic pathways; Pentose phosphate pathway	Metabolic pathways; Pentose phosphate pathway	1.8428	1.7984	1.1612	0.003546	0.04303	4.2664	4.6896	4.8167	4.4141	4.4762	4.3472	4.03	3.5607	4.162	3.6486	3.5242	4.3371
pos_6125	MJAW00014	metab_5931	yes	down	-	pos	-	243.134	3.11567	M+H-H2O	C11H20N2O5	54.8	-	;MJAW00014	-	-	-	-	-	-	-	-	54.8	-	-	-	1.2471	1.1824	0.9505	0.00661	0.05917	5.2346	5.3225	5.32	5.1706	5.3522	5.3995	5.5803	5.5947	5.2695	5.7824	5.7171	5.51
pos_6854	2-[(2-hydroxy-3-methylbutanoyl)amino]-4-methylpentanoic acid	metab_6643	yes	up	-	pos	-	480.331	4.32373	2M+NH4	C11H21NO4	69.4	-	-	-	-	-	-	-	-	-	-	69.4	-	-	-	5.6306	5.5254	3.5814	4.336e-13	9.004e-10	6.1337	6.2024	6.3323	6.2312	6.2287	6.2425	1.675	1.6641	1.6307	1.6432	2.1944	1.6293
pos_6890	(2S,3R)-2-aminooctadecane-1,3-diol	metab_6677	yes	up	C00836	pos	764-22-7	340.259	4.40478	M+K	C18H39NO2	72.2	-	HMDB0000269	-	-	map00600;map01100;map04071	Metabolism;Metabolism;Environmental Information Processing	Lipid metabolism;Global and overview maps;Signal transduction	Organic nitrogen compounds	Organonitrogen compounds	Amines	72.2	-	Sphingolipid metabolism; Metabolic pathways; Sphingolipid signaling pathway	Sphingolipid metabolism; Metabolic pathways; Sphingolipid signaling pathway	1.8748	1.8907	1.1171	0.0004527	0.01456	5.4809	5.3811	5.3243	5.5726	5.4099	5.3487	4.7965	4.7753	4.6062	4.88	5.3391	4.7148
pos_6977	N6-(Delta2-Isopentenyl)-Adenine	metab_6763	yes	down	C04083	pos	-	204.124	4.58758	M+H	C10H13N5	65.2	-	-	-	-	map01110;map04075;map00908	Metabolism;Environmental Information Processing;Metabolism	Global and overview maps;Signal transduction;Metabolism of terpenoids and polyketides	-	-	-	65.2	-	Biosynthesis of secondary metabolites; Plant hormone signal transduction; Zeatin biosynthesis	Biosynthesis of secondary metabolites; Plant hormone signal transduction; Zeatin biosynthesis	1.6685	1.5853	0.9074	0.003573	0.04307	5.0686	5.2188	4.9274	4.4809	4.8124	4.6666	5.5496	5.4474	5.203	5.3997	5.4585	5.0879
pos_7079	2-Ethyl-5-imino-1-cyclopenten-1-ol	metab_6863	yes	up	-	pos	90554-84-0	126.091	4.79855	M+H	C7H11NO	53.6	-	HMDB0039583	-	-	-	-	-	Organic nitrogen compounds	Organonitrogen compounds	Imines	53.6	-	-	-	1.2047	1.1895	1.078	0.04631	0.1661	4.7715	5.0029	4.8154	4.4655	4.6531	4.5722	4.3181	4.2467	4.9807	4.1777	4.1112	4.3956
pos_7787	3-Hexaprenyl-4,5-Dihydroxybenzoic acid	metab_7560	yes	up	C05200	pos	63975-40-6	626.422	6.07837	M+ACN+Na	C37H54O4	-	51.1	HMDB0001063;LMPR02010043	-	-	map00130;map01110	Metabolism;Metabolism	Metabolism of cofactors and vitamins;Global and overview maps	Lipids and lipid-like molecules	Prenol lipids	Polyprenylphenols	-	51.1	Ubiquinone and other terpenoid-quinone biosynthesis; Biosynthesis of secondary metabolites	Ubiquinone and other terpenoid-quinone biosynthesis; Biosynthesis of secondary metabolites	1.4118	1.3259	1.0733	0.005758	0.05471	5.2686	5.2393	5.3311	5.1477	5.3426	5.11	4.8288	4.5449	5.1691	4.7091	5.0427	4.9999
pos_7871	Peimine	metab_7636	yes	down	C10830	pos	-	449.373	6.14607	M+NH4	C27H45NO3	71.9	-	;MJDBOTE0001278	-	-	-	-	-	-	-	-	71.9	-	-	-	2.3007	2.2705	0.7909	0.00866	0.06789	5.1625	3.6626	4.508	3.6865	3.6491	3.9967	5.017	5.4546	5.7911	5.6163	5.0177	4.2923
pos_7925	MJAW00140	metab_7685	yes	up	-	pos	-	504.331	6.1896	M+H-H2O	C29H47NO7	85.4	-	;MJAW00140	-	-	-	-	-	-	-	-	85.4	-	-	-	3.3742	3.3269	1.3516	2.31e-09	1.679e-06	6.3324	6.2631	6.2292	6.3126	6.2416	6.1475	4.785	4.8262	4.3964	4.761	4.5659	4.4259
pos_7973	Lauric isopropanolamide	metab_7731	yes	up	-	pos	-	290.268	6.23018	M+CH3OH+H	C15H31NO2	63.5	-	-	-	-	-	-	-	-	-	-	63.5	-	-	-	1.2944	1.258	1.0595	0.007984	0.06533	5.7486	5.7598	5.7109	5.5461	5.695	5.5445	5.569	5.2546	5.535	5.1638	5.0648	5.5061
pos_8195	DL-Palmitoylcarnitine	metab_7935	yes	up	-	pos	-	400.341	6.40253	M+H	C23H45NO4	65.9	-	-	-	-	-	-	-	-	-	-	65.9	-	-	-	1.662	1.6058	1.0668	0.0002596	0.01114	6.903	6.6496	6.6258	6.8783	6.7279	6.867	6.3345	6.2651	6.4071	6.3836	6.5699	6.1438
pos_8272	(23E)-5,25-Dihydroxy-4,4-dimethylergosta-8,23-diene-3,22-dione	metab_8003	yes	down	-	pos	-	435.321	6.49055	M+H-2H2O	C30H46O4	74.5	-	-	-	-	-	-	-	-	-	-	74.5	-	-	-	1.9876	2.0321	0.82	0.01705	0.09552	4.5378	3.7452	3.7385	4.9356	3.9635	4.2196	5.1389	4.8451	4.4646	6.2536	5.2522	4.7052
pos_8329	2-Hydroxymethylclavam	metab_8052	yes	up	C17357	pos	-	144.065	6.57192	M+H	C6H9NO3	86.6	-	-	-	-	-	-	-	-	-	-	86.6	-	-	-	1.2347	1.1701	1.0682	0.02136	0.1079	4.8742	4.8332	4.8612	4.9299	4.8842	4.8601	4.4274	4.3073	4.6875	4.3395	5.0471	4.5719
pos_8385	Phosphocholine	metab_8099	yes	down	C00588	pos	-	184.073	6.64	M+H	C5H14NO4P	83.4	-	HMDB0001565	-	-	map01100;map00564;map05231	Metabolism;Metabolism;Human Diseases	Global and overview maps;Lipid metabolism;Cancer: overview	Organic nitrogen compounds	Organonitrogen compounds	Quaternary ammonium salts	83.4	-	Metabolic pathways; Glycerophospholipid metabolism; Choline metabolism in cancer	Metabolic pathways; Glycerophospholipid metabolism; Choline metabolism in cancer	1.4617	1.4973	0.9164	0.03004	0.1297	5.1997	5.0435	5.2595	5.2736	5.168	5.2253	5.3604	5.6812	5.1685	6.0424	6.353	5.4085
pos_8418	Tobramycin, N-propionyl derivative likely	metab_8129	yes	down	-	pos	-	488.274	6.67883	M+H-2H2O	C21H41N5O10	50.3	-	-	-	-	-	-	-	-	-	-	50.3	-	-	-	2.3493	2.2823	0.8453	5.848e-05	0.004546	4.5903	4.6565	5.0897	4.7956	4.5688	4.4647	5.5495	5.388	5.2569	5.5289	5.697	5.8992
pos_8558	Heptadecanoic acid	metab_8256	yes	down	-	pos	506-12-7	312.289	6.84463	M+ACN+H	C17H34O2	54.1	-	HMDB0006210;HMDB0002259;HMDB0006497;LMFA01010017	-	-	-	-	-	Lipids and lipid-like molecules	Fatty Acyls	Fatty acid esters	54.1	-	-	-	1.5597	1.5298	0.8984	0.01953	0.1031	4.323	4.2512	4.6922	4.4811	4.4896	4.3495	4.4265	5.1225	4.7817	5.2384	5.4767	4.5483
pos_8559	PE(MonoMe(11,3)/MonoMe(11,5))	metab_8257	yes	up	-	pos	-	824.536	6.84463	M+H	C45H78NO10P	-	65.7	HMDB0061522	-	-	-	-	-	Lipids and lipid-like molecules	Glycerophospholipids	Glycerophosphoethanolamines	-	65.7	-	-	1.4621	1.4132	1.0904	0.001266	0.02529	4.5405	3.9484	4.389	4.3113	4.2771	4.301	3.9721	3.9609	3.9267	3.9396	3.9116	3.9253
pos_8568	Rakicidin	metab_8265	yes	up	-	pos	-	648.43	6.8568	M+ACN+H	C32H54N4O7	70.2	-	-	-	-	-	-	-	-	-	-	70.2	-	-	-	1.3053	1.2554	1.0496	0.0001933	0.009204	5.8196	5.7835	5.7479	5.7027	5.738	5.721	5.4811	5.4727	5.5767	5.4368	5.3037	5.6082
pos_8607	Phosphatidylethanolamine (20:1/16:1) Abbr	metab_8301	yes	up	-	pos	-	766.53	6.8967	M+Na	C41H78NO8P	75.2	-	-	-	-	-	-	-	-	-	-	75.2	-	-	-	2.2093	2.1776	1.1653	7.627e-06	0.001369	5.1728	5.3589	5.0612	5.3075	5.3794	5.4031	4.3699	4.6946	4.6377	4.3374	4.7186	4.4305
pos_8851	Pubesenolide	metab_8520	yes	down	-	pos	98569-64-3	481.292	7.15362	M+Na	C28H42O5	-	72.1	HMDB0033728	-	-	-	-	-	Lipids and lipid-like molecules	Prenol lipids	Triterpenoids	-	72.1	-	-	2.8707	2.799	0.7352	0.0015	0.02782	4.7317	4.1258	4.0709	4.1238	4.1069	3.0971	5.5708	5.916	4.3629	5.9301	6.016	5.1982
pos_8888	Heptadecanoyl Ethanolamide	metab_8553	yes	up	-	pos	-	314.305	7.19003	M+H	C19H39NO2	61.2	-	-	-	-	-	-	-	-	-	-	61.2	-	-	-	1.3959	1.4612	1.0858	0.02246	0.1112	5.2033	4.894	4.9151	5.4243	5.1404	5.2464	4.5485	4.6322	4.3078	4.9088	5.1985	4.7874
pos_11713	Larixol Acetate	metab_11027	yes	up	-	pos	-	349.273	7.27305	M+H	C22H36O3	80	-	-	-	-	-	-	-	-	-	-	80	-	-	-	1.4262	1.3189	1.0843	0.01971	0.1035	5.2398	4.8961	4.8353	5.3845	5.1663	5.2023	5.0611	4.6654	4.8206	4.2434	4.8994	4.6455
pos_11820	N,N-Diethyl-3,4-dimethoxybenzamide	metab_11115	yes	down	-	pos	-	516.305	7.19003	2M+ACN+H	C13H19NO3	62.5	-	-	-	-	-	-	-	-	-	-	62.5	-	-	-	2.1204	2.0517	0.8505	0.004674	0.04974	5.0997	4.8189	5.28	4.1579	4.5657	4.2051	5.7827	5.4007	5.2516	5.1324	5.5606	5.9455
pos_12039	Methyl palmitoleate	metab_11307	yes	down	-	pos	-	310.273	7.08265	M+ACN+H	C17H32O2	76.5	-	-	-	-	-	-	-	-	-	-	76.5	-	-	-	1.8246	1.7661	0.8792	0.0033	0.04201	4.2899	4.2794	4.3646	4.6654	4.2903	4.4928	5.186	5.1092	4.3906	5.4033	5.1021	4.8144
pos_12272	Iso-Roridine	metab_11514	yes	down	-	pos	-	537.249	6.951	M+Na	C29H38O8	68	-	-	-	-	-	-	-	-	-	-	68	-	-	-	1.9665	1.9004	0.8279	0.03226	0.135	3.6042	3.5676	3.9122	4.5174	4.479	5.3542	4.8232	4.3767	4.8084	5.7074	5.6694	5.3357
pos_12278	Methyl linolenate	metab_11520	yes	down	-	pos	-	293.247	6.951	M+H	C19H32O2	66.2	-	-	-	-	-	-	-	-	-	-	66.2	-	-	-	1.0297	0.9899	0.9654	0.005185	0.05231	5.4897	5.3545	5.5778	5.4899	5.4655	5.5716	5.8324	5.692	5.5436	5.7608	5.7185	5.5844
pos_12419	Carmaphycin B enone analogue	metab_11652	yes	down	-	pos	-	516.305	6.87278	M+H	C25H45N3O6S	73.2	-	-	-	-	-	-	-	-	-	-	73.2	-	-	-	2.8198	2.6523	0.7552	0.002169	0.03377	3.6918	4.6044	4.1002	3.9586	4.1846	4.1844	5.5686	5.4427	4.0539	5.7878	6.245	5.6468
pos_12483	2-benzyl-1-methyl-5-nonylpyrrolidin-3-ol	metab_11713	yes	up	-	pos	-	381.289	6.84463	M+ACN+Na	C21H35NO	73.8	-	-	-	-	-	-	-	-	-	-	73.8	-	-	-	1.0685	1.0144	1.0338	0.0009622	0.02182	5.8113	5.7641	5.7526	5.7442	5.7482	5.6778	5.5989	5.5741	5.6797	5.5244	5.4097	5.5852
pos_12640	Cholesterol	metab_11858	yes	down	C00187	pos	57-88-5	409.342	6.76585	M+Na	C27H46O	73.9	-	HMDB0000067;LMST01010001	Steroids	27-Carbon atoms	map01100;map00984;map01120;map00981;map04979;map04913;map04976;map00120;map04975;map04977;map04925;map04927;map00100;map01066;map04934;map00140;map05217;map05200	Metabolism;Metabolism;Metabolism;Metabolism;Organismal Systems;Organismal Systems;Organismal Systems;Metabolism;Organismal Systems;Organismal Systems;Organismal Systems;Organismal Systems;Metabolism;Metabolism;Human Diseases;Metabolism;Human Diseases;Human Diseases	Global and overview maps;Xenobiotics biodegradation and metabolism;Global and overview maps;Metabolism of terpenoids and polyketides;Digestive system;Endocrine system;Digestive system;Lipid metabolism;Digestive system;Digestive system;Endocrine system;Endocrine system;Lipid metabolism;Chemical structure transformation maps;Endocrine and metabolic disease;Lipid metabolism;Cancer: specific types;Ca…	Lipids and lipid-like molecules	Steroids and steroid derivatives	Cholestane steroids	73.9	-	Metabolic pathways; Steroid degradation; Microbial metabolism in diverse environments; Insect hormone biosynthesis; Cholesterol metabolism; Ovarian steroidogenesis; Bile secretion; Primary bile acid biosynthesis; Fat digestion and absorption; Vitamin digestion and absorption; Aldosterone synthesis and secretion; Cortisol synthesis and secretion; Steroid biosynthesis; Biosynthesis of alkaloids der…	Metabolic pathways; Steroid degradation; Microbial metabolism in diverse environments; Insect hormone biosynthesis; Cholesterol metabolism; Ovarian steroidogenesis; Bile secretion; Primary bile acid biosynthesis; Fat digestion and absorption; Vitamin digestion and absorption; Aldosterone synthesis and secretion; Cortisol synthesis and secretion; Steroid biosynthesis; Biosynthesis of alkaloids der…	1.4265	1.3987	0.9386	0.005252	0.05247	6.0845	5.8556	6.231	6.0498	5.8265	5.7912	6.2146	6.5296	6.3329	6.6285	6.4061	6.0694
pos_12869	Dihydroxy (3Alpha,12Alpha)Pregnan-20-One	metab_12060	yes	up	-	pos	-	352.284	6.64353	M+NH4	C21H34O3	75.8	-	-	-	-	-	-	-	-	-	-	75.8	-	-	-	1.4074	1.4015	1.0752	0.005075	0.05178	5.1738	5.0391	5.5619	5.6611	5.3509	5.3151	5.0177	5.0769	4.7664	5.0115	4.9779	5.008
pos_12903	Asperagenin	metab_12089	yes	up	-	pos	17305-15-6	466.352	6.62468	M+NH4	C27H44O5	-	86.3	HMDB0034293	-	-	-	-	-	Lipids and lipid-like molecules	Prenol lipids	Triterpenoids	-	86.3	-	-	2.7348	2.5481	1.4223	0.006855	0.06007	4.724	4.7346	3.1086	4.8691	4.8487	4.8369	2.7813	2.91	4.3457	2.892	3.6117	2.527
pos_12975	Octacosanal	metab_12153	yes	down	-	pos	22725-64-0	426.466	6.58375	M+NH4	C28H56O	-	54.3	LMFA06000108;HMDB0029690	-	-	-	-	-	Lipids and lipid-like molecules	Fatty Acyls	Fatty aldehydes	-	54.3	-	-	2.0658	2.1171	0.8334	0.004159	0.04691	5.1125	4.252	4.3064	5.0634	4.3179	3.6288	5.4159	5.3052	5.0314	5.5481	5.4679	5.2446
pos_12991	Adrenoyl ethanolamide	metab_12168	yes	down	C13829	pos	150314-35-5	393.347	6.5752	M+NH4	C24H41NO2	-	54.1	HMDB0013626	-	-	-	-	-	Organic nitrogen compounds	Organonitrogen compounds	Amines	-	54.1	-	-	1.8361	1.8092	0.8773	0.003432	0.04281	4.7695	4.8468	4.86	4.6567	4.3081	4.1126	5.0632	5.2269	5.168	5.7087	5.3216	4.9153
pos_13157	2-aminooctadec-4-ene-1,3-diol	metab_12322	yes	up	-	pos	-	322.273	6.51507	M+Na	C18H37NO2	61	-	-	-	-	-	-	-	-	-	-	61	-	-	-	1.342	1.2918	1.0556	8.333e-05	0.005737	5.3338	5.4491	5.3571	5.3465	5.2406	5.3944	5.1263	4.9952	5.1275	5.0384	4.966	5.1761
pos_13197	Stearoyl-L-Carnitine	metab_12359	yes	up	-	pos	-	428.372	6.47553	M+H	C25H49NO4	54.6	-	HMDB0000848	-	-	-	-	-	Lipids and lipid-like molecules	Fatty Acyls	Fatty acid esters	54.6	-	-	-	1.5488	1.4666	1.0568	5.673e-05	0.004467	6.6936	6.5557	6.5868	6.7598	6.6786	6.8122	6.3577	6.184	6.4156	6.2462	6.3828	6.3465
pos_13210	Putative (3-hydroxyoctadecanoyl)glycine	metab_12371	yes	down	-	pos	-	390.32	6.4705	M+CH3OH+H	C20H39NO4	81.6	-	-	-	-	-	-	-	-	-	-	81.6	-	-	-	1.0505	1.0158	0.9656	0.007184	0.06169	5.8515	5.699	5.8702	5.8878	5.8661	5.99	5.986	6.0673	5.9138	6.2523	6.1529	6.047
pos_13337	3a,7a,12a-Trihydroxy-5b-cholestan-26-al	metab_12490	yes	up	C01301	pos	3836-01-09	452.373	6.43602	M+NH4	C27H46O4	-	54.9	HMDB0003533	-	-	map01100;map00120	Metabolism;Metabolism	Global and overview maps;Lipid metabolism	Lipids and lipid-like molecules	Steroids and steroid derivatives	Bile acids, alcohols and derivatives	-	54.9	Metabolic pathways; Primary bile acid biosynthesis	Metabolic pathways; Primary bile acid biosynthesis	1.0202	0.9376	1.0368	0.02514	0.1179	5.8333	5.4815	5.5858	5.832	5.5823	5.7079	5.3168	5.4074	5.5975	5.4399	5.627	5.4262
pos_13777	6-hydroxysphingosine	metab_12891	yes	down	-	pos	-	316.284	6.2539	M+H	C18H37NO3	77.3	-	LMSP01080003	-	-	-	-	-	-	-	-	77.3	-	-	-	1.5344	1.4493	0.9384	0.0003009	0.01202	5.5788	5.5013	5.6054	5.677	5.6474	5.6225	5.877	6.2329	5.7973	5.9933	6.0492	5.8911
pos_13869	11Beta,17Alpha,21-Trihydroxy-4-Pregnene-3,20-Dione 21-Caprylate	metab_12973	yes	up	-	pos	-	530.347	6.2069	M+ACN+H	C29H44O6	56.1	-	-	-	-	-	-	-	-	-	-	56.1	-	-	-	2.0991	2.0139	1.1618	0.00214	0.03357	5.7923	5.5437	5.7129	5.5053	5.4503	5.3508	4.9426	4.9822	5.0028	5.0097	3.9109	4.8639
pos_13942	Soladulcidine	metab_13036	yes	up	C10826	pos	-	416.351	6.1846	M+H	C27H45NO2	66.1	-	LMST01150002;HMDB0034731	-	-	map01066	Metabolism	Chemical structure transformation maps	Lipids and lipid-like molecules	Steroids and steroid derivatives	Steroidal alkaloids	66.1	-	Biosynthesis of alkaloids derived from terpenoid and polyketide	Biosynthesis of alkaloids derived from terpenoid and polyketide	2.5494	2.5122	1.2442	6.894e-05	0.005061	5.5533	5.1308	4.8037	5.2393	5.0424	5.0153	4.1809	4.2609	3.5819	4.2306	4.0972	4.3941
pos_14021	3E,5E-tridecadienoic acid	metab_13108	yes	up	-	pos	-	211.169	6.15387	M+H	C13H22O2	61.2	-	LMFA01030244	-	-	-	-	-	-	-	-	61.2	-	-	-	1.7196	1.7078	1.17	0.01899	0.1014	4.4766	4.4302	5.1288	4.1847	4.5104	4.5289	4.0307	3.3997	3.5051	3.6313	4.0113	4.7227
pos_14373	Methyl Deoxycholate	metab_13437	yes	up	-	pos	-	448.341	6.00192	M+ACN+H	C25H42O4	63.3	-	-	-	-	-	-	-	-	-	-	63.3	-	-	-	4.4167	4.2797	1.6628	7.929e-10	6.067e-07	7.1755	6.7657	6.6983	6.9153	6.8414	6.7291	4.0463	3.9857	4.3473	4.4996	3.8656	3.9851
pos_14392	Trp derivative	metab_13455	yes	down	-	pos	-	224.091	5.99102	M+H	C11H13NO4	60.1	-	-	-	-	-	-	-	-	-	-	60.1	-	-	-	1.8376	1.7971	0.9105	6.893e-05	0.005061	5.2507	5.2316	5.4216	5.5644	5.4556	5.6194	6.0677	5.8637	5.8752	6.1558	5.8866	5.8945
pos_14436	Lunarine	metab_13497	yes	down	C10603	pos	-	470.264	5.96108	M+CH3OH+H	C25H31N3O4	62.8	-	-	-	-	-	-	-	-	-	-	62.8	-	-	-	1.3167	1.2491	0.95	0.002872	0.03942	5.5945	5.5362	5.7073	5.546	5.6155	5.6587	5.9581	5.9641	5.5709	6.0511	6.0019	5.8858
pos_14491	Erinacine D	metab_13552	yes	up	-	pos	157397-40-5	520.326	5.91198	M+ACN+H	C27H42O7	-	55.7	HMDB0031896	-	-	-	-	-	Lipids and lipid-like molecules	Prenol lipids	Diterpenoids	-	55.7	-	-	5.7279	5.7588	4.3993	5.535e-06	0.001073	6.5198	6.538	6.4921	6.6431	6.5188	6.3537	1.8409	3.5029	0.2872	2.6838	0.28	0.2865
pos_15068	MJAW00178	metab_14119	yes	up	-	pos	-	443.228	5.20182	2M+K	C9H18N2O3	58.4	-	;MJAW00178	-	-	-	-	-	-	-	-	58.4	-	-	-	1.815	1.7237	1.1124	0.004138	0.04681	5.6848	5.7442	5.423	6.1981	5.9913	6.0525	5.3868	5.473	5.5872	5.1357	5.0954	4.8671
pos_15749	N-(3S-hydroxydecanoyl)-L-serine	metab_14788	yes	up	-	pos	-	276.18	4.34948	M+H	C13H25NO5	61.4	-	LMFA00000002	-	-	-	-	-	-	-	-	61.4	-	-	-	3.9815	3.8457	1.7685	3.726e-08	1.868e-05	5.466	4.9111	5.0343	5.5007	5.0196	4.8724	3.0958	2.6853	2.5753	2.9329	2.9179	3.2091
pos_16401	Dropropizine	metab_15431	yes	up	-	pos	-	254.186	3.6374	M+NH4	C13H20N2O2	51.7	-	-	-	-	-	-	-	-	-	-	51.7	-	-	-	4.1391	3.9862	1.8984	2.925e-07	0.000109	5.5217	5.1528	5.0848	5.3021	5.0944	5.1099	2.9562	2.8915	3.1108	2.8445	1.7996	2.8691
pos_16700	N-(5-acetamidopentyl)acetamide	metab_15726	yes	down	-	pos	-	187.144	3.34872	M+H	C9H18N2O2	76.3	-	-	-	-	-	-	-	-	-	-	76.3	-	-	-	1.5182	1.4778	0.916	0.001638	0.02917	4.6135	4.364	4.6618	4.4847	4.3307	4.4468	4.6446	4.899	4.915	5.2376	4.7974	4.8746
pos_16703	Isoleucyl-Arginine	metab_15729	yes	down	-	pos	-	270.192	3.34552	M+H-H2O	C12H25N5O3	-	59.8	HMDB0028901	-	-	-	-	-	Organic acids and derivatives	Carboxylic acids and derivatives	Amino acids, peptides, and analogues	-	59.8	-	-	1.4606	1.372	0.9181	0.02386	0.1149	4.9587	4.7322	4.7513	4.5979	4.6476	4.8447	5.0785	5.8231	4.8873	5.3976	5.0073	4.8823
pos_17452	(5E)-2-heptyl-3,4,7-trihydroxy-2,3,4,7,8,9-hexahydrooxecin-10-one	metab_16443	yes	up	-	pos	-	323.182	2.63683	M+Na	C16H28O5	54.7	-	-	-	-	-	-	-	-	-	-	54.7	-	-	-	1.3731	1.3224	1.0731	0.01001	0.07273	5.4269	5.6501	5.3712	5.1476	5.5034	5.4951	5.2263	4.8479	5.288	5.3014	4.8733	4.8326
pos_17647	Thymine	metab_16608	yes	down	C00178	pos	65-71-4	127.05	2.3704	M+H	C5H6N2O2	95.6	-	HMDB0000262	Nucleic acids	Bases	map00240;map01100	Metabolism;Metabolism	Nucleotide metabolism;Global and overview maps	Organoheterocyclic compounds	Diazines	Pyrimidines and pyrimidine derivatives	95.6	-	Pyrimidine metabolism; Metabolic pathways	Pyrimidine metabolism; Metabolic pathways	1.0722	1.1008	0.9585	0.01363	0.08502	5.8769	5.6585	5.5314	5.8978	5.7014	5.8004	5.8854	5.9732	5.8952	5.9601	5.9605	6.2861
pos_17748	6-O-Methylguanine	metab_16709	yes	up	-	pos	-	166.072	1.9915	M+H	C6H7N5O	77.1	-	-	-	-	-	-	-	-	-	-	77.1	-	-	-	1.0956	1.0507	1.0441	0.008369	0.06678	5.2795	5.5552	5.4212	5.5253	5.5119	5.6302	5.3296	5.0861	5.3607	5.3831	5.137	5.2345
pos_17946	N-Acetyl-L-glutamate	metab_16902	yes	down	C00624	pos	1188-37-0	212.053	1.48637	M+Na	C7H11NO5	56.2	-	HMDB0001138	-	-	map01100;map01210;map00220;map01110;map01230	Metabolism;Metabolism;Metabolism;Metabolism;Metabolism	Global and overview maps;Global and overview maps;Amino acid metabolism;Global and overview maps;Global and overview maps	Organic acids and derivatives	Carboxylic acids and derivatives	Amino acids, peptides, and analogues	56.2	-	Metabolic pathways; 2-Oxocarboxylic acid metabolism; Arginine biosynthesis; Biosynthesis of secondary metabolites; Biosynthesis of amino acids	Metabolic pathways; 2-Oxocarboxylic acid metabolism; Arginine biosynthesis; Biosynthesis of secondary metabolites; Biosynthesis of amino acids	1.9865	1.911	0.896	1.808e-05	0.002433	5.1966	5.1886	5.1578	4.7909	4.9473	5.0219	5.6804	5.69	5.5738	5.6702	5.4709	5.735
pos_18185	Uric acid	metab_17131	yes	up	C00366	pos	69-93-2	169.035	1.20792	M+H	C5H4N4O3	64.4	-	HMDB0000289	-	-	map01100;map04976;map00230;map01120	Metabolism;Organismal Systems;Metabolism;Metabolism	Global and overview maps;Digestive system;Nucleotide metabolism;Global and overview maps	Organoheterocyclic compounds	Imidazopyrimidines	Purines and purine derivatives	64.4	-	Metabolic pathways; Bile secretion; Purine metabolism; Microbial metabolism in diverse environments	Metabolic pathways; Bile secretion; Purine metabolism; Microbial metabolism in diverse environments	1.3323	1.3121	1.0894	0.01524	0.09047	4.8032	4.8856	4.6886	4.4753	4.5053	4.51	4.0549	4.3857	4.4939	4.0016	4.0333	4.6157
pos_18358	2,6-Piperidinedicarboxylic acid	metab_17292	yes	up	-	pos	-	174.076	1.09952	M+H	C7H11NO4	65.3	-	-	-	-	-	-	-	-	-	-	65.3	-	-	-	1.8591	1.7974	1.0986	0.0001752	0.00866	6.238	6.3004	6.296	5.9777	6.0618	6.0934	5.6609	5.5385	5.8046	5.7699	5.2775	5.5993
pos_18760	Formimino-L-glutamic acid	metab_17671	yes	down	C00439	pos	-	175.071	0.749967	M+H	C6H10N2O4	62.7	-	HMDB0000854	-	-	map01100;map00340	Metabolism;Metabolism	Global and overview maps;Amino acid metabolism	Organic acids and derivatives	Carboxylic acids and derivatives	Amino acids, peptides, and analogues	62.7	-	Metabolic pathways; Histidine metabolism	Metabolic pathways; Histidine metabolism	1.453	1.4078	0.9385	0.002243	0.0344	5.6337	5.3732	5.5434	5.477	5.4685	5.5693	5.8247	6.1907	5.9406	5.6077	5.753	5.9142
pos_18842	Thiamine monophosphate	metab_17736	yes	down	C01081	pos	495-23-8	345.077	0.718467	M+H	C12H17N4O4PS	62.2	-	HMDB0002666	-	-	map00730;map01100	Metabolism;Metabolism	Metabolism of cofactors and vitamins;Global and overview maps	Organoheterocyclic compounds	Diazines	Pyrimidines and pyrimidine derivatives	62.2	-	Thiamine metabolism; Metabolic pathways	Thiamine metabolism; Metabolic pathways	3.2285	3.1333	0.6565	0.0003481	0.01296	3.8423	2.4254	4.0886	3.5586	2.4119	3.4862	5.1561	5.2609	4.518	5.486	4.7528	5.0035
pos_18937	(R)-(+)-2-Pyrrolidone-5-carboxylic acid	metab_17822	yes	down	-	pos	-	130.05	0.688	M+H	C5H7NO3	76.8	-	-	-	-	-	-	-	-	-	-	76.8	-	-	-	1.4853	1.4204	0.952	8.47e-06	0.001432	6.2816	6.4306	6.3254	6.2733	6.3382	6.3469	6.7328	6.7271	6.5648	6.657	6.5612	6.6678
pos_19020	Dimethylethanolamine	metab_17894	yes	down	C04308	pos	108-01-0	90.0917	0.665767	M+H	C4H11NO	62.4	-	HMDB0032231	-	-	map01100;map00564;map01110	Metabolism;Metabolism;Metabolism	Global and overview maps;Lipid metabolism;Global and overview maps	Organic nitrogen compounds	Organonitrogen compounds	Amines	62.4	-	Metabolic pathways; Glycerophospholipid metabolism; Biosynthesis of secondary metabolites	Metabolic pathways; Glycerophospholipid metabolism; Biosynthesis of secondary metabolites	1.5693	1.5777	0.8789	0.01564	0.09157	4.3941	4.0172	3.9163	3.968	3.9405	3.8001	4.6664	4.7118	4.981	4.3962	4.7931	3.798
pos_19029	Beta-Alanyl-L-arginine	metab_17903	yes	down	C05340	pos	-	246.156	0.662233	M+H	C9H19N5O3	51.2	-	HMDB0060441	-	-	map01100;map00410	Metabolism;Metabolism	Global and overview maps;Metabolism of other amino acids	Organic acids and derivatives	Peptidomimetics	Hybrid peptides	51.2	-	Metabolic pathways; beta-Alanine metabolism	Metabolic pathways; beta-Alanine metabolism	1.7503	1.7728	0.8757	0.009985	0.07268	4.8196	4.3484	4.5171	4.3072	4.3834	4.2131	5.024	4.9875	4.6137	5.5028	5.6347	4.5955
pos_19216	Agmatine	metab_18074	yes	up	C00179	pos	306-60-5	131.129	0.62735	M+H	C5H14N4	71	-	HMDB0001432	-	-	map01100;map00330	Metabolism;Metabolism	Global and overview maps;Amino acid metabolism	Organic nitrogen compounds	Organonitrogen compounds	Guanidines	71	-	Metabolic pathways; Arginine and proline metabolism	Metabolic pathways; Arginine and proline metabolism	1.262	1.1885	1.0783	0.02285	0.112	4.3616	4.2754	4.0889	4.6415	4.4199	4.665	4.3516	3.9948	4.2959	3.8665	3.9973	4.0293
pos_19397	D-Ornithine	metab_18234	yes	down	C00515	pos	348-66-3	133.097	0.586	M+H	C5H12N2O2	77.3	-	HMDB0003374	-	-	map01100;map00472;map00997;map01110	Metabolism;Metabolism;Metabolism;Metabolism	Global and overview maps;Metabolism of other amino acids;Biosynthesis of other secondary metabolites;Global and overview maps	Organic acids and derivatives	Carboxylic acids and derivatives	Amino acids, peptides, and analogues	77.3	-	Metabolic pathways; D-Arginine and D-ornithine metabolism; Biosynthesis of various secondary metabolites - part 3; Biosynthesis of secondary metabolites	Metabolic pathways; D-Arginine and D-ornithine metabolism; Biosynthesis of various secondary metabolites - part 3; Biosynthesis of secondary metabolites	2.2946	2.2113	0.8353	1.936e-05	0.002575	4.1623	3.9551	4.0035	4.0561	4.1605	4.0577	4.7726	4.8323	4.5074	4.9143	5.2663	4.9121
pos_16669	Indole-3-carboxaldehyde	metab_18454	yes	up	C08493	pos	487-89-8	146.06	3.37515	M+H	C9H7NO	91.5	-	HMDB0029737;HMDB0000197;HMDB0000195;MJDBSJD0000088	-	-	-	-	-	Organoheterocyclic compounds	Indoles and derivatives	Indoles	91.5	-	-	-	1.5361	1.473	1.0748	0.0001456	0.007839	5.4277	5.4418	5.3848	5.3496	5.1936	5.2789	5.1002	5.0269	5.0773	4.8396	4.8151	4.9869
pos_5281	Isonicotinic acid	metab_18455	yes	down	C07446	pos	55-22-1	124.039	1.16903	M+H	C6H5NO2	67.2	-	HMDB0060665;HMDB0041912	-	-	map00983	Metabolism	Xenobiotics biodegradation and metabolism	Organoheterocyclic compounds	Pyridines and derivatives	Pyridinecarboxylic acids and derivatives	67.2	-	Drug metabolism - other enzymes	Drug metabolism - other enzymes	1.392	1.3452	0.9595	2.855e-05	0.003077	7.1556	7.0212	7.0996	7.0424	6.9329	7.0044	7.3605	7.458	7.2895	7.3425	7.3034	7.2877

## Sheet: HTST vs Blank
ID	Metabolite	Metab ID	Significant	Regulate	KEGG Compound ID	Mode	CAS ID	M/Z	Retention time	Adducts	Formula	Fragmentation Score	Theoretical Fragmentation Score	Library ID	KEGG Compound First Category	KEGG Compound Second Category	KEGG Pathway ID	KEGG Pathway First Category	KEGG Pathway Second Category	HMDB Superclass	HMDB Class	HMDB Subclass	Fragmentation Score	Theoretical Fragmentation Score	KEGG Pathway Description	KEGG Pathway Description	VIP_pred_OPLS-DA	VIP_PLS-DA	FC(HTST/Control)	P_value	FDR	HTST_1	HTST_2	HTST_3	HTST_4	HTST_5	HTST_6	Blank_1	Blank_2	Blank_3	Blank_4	Blank_5	Blank_6
neg_33	Albocycline	metab_18494	yes	down	-	neg	-	307.192	6.52013	M-H, 2M-H, M-H2O-H	C18H28O4	72.7	-	-	-	-	-	-	-	-	-	-	72.7	-	-	-	1.3083	1.232	0.9564	0.02022	0.1119	7.0286	7.0561	6.8523	6.7307	6.872	7.4058	7.3047	7.5473	7.0861	7.3007	7.3985	7.2211
neg_146	Deoxyinosine	metab_18605	yes	down	C05512	neg	890-38-0	251.079	3.01603	M-H, M+Na-2H	C10H12N4O4	88.7	-	HMDB0000071	-	-	map01100;map02010;map00230	Metabolism;Environmental Information Processing;Metabolism	Global and overview maps;Membrane transport;Nucleotide metabolism	Nucleosides, nucleotides, and analogues	Purine nucleosides	Purine 2'-deoxyribonucleosides	88.7	-	Metabolic pathways; ABC transporters; Purine metabolism	Metabolic pathways; ABC transporters; Purine metabolism	1.0732	0.9763	0.9684	0.0287	0.131	7.0991	7.0208	6.7991	6.6607	6.859	7.1717	7.1901	7.1757	7.2079	6.9693	7.2061	7.2173
neg_149	Deoxyguanosine	metab_18608	yes	up	C00330	neg	961-07-9	266.09	3.19888	M-H, M+Na-2H	C10H13N5O4	89.8	-	HMDB0000085	Nucleic acids	Nucleosides	map01100;map02010;map00230	Metabolism;Environmental Information Processing;Metabolism	Global and overview maps;Membrane transport;Nucleotide metabolism	Nucleosides, nucleotides, and analogues	Purine nucleosides	Purine 2'-deoxyribonucleosides	89.8	-	Metabolic pathways; ABC transporters; Purine metabolism	Metabolic pathways; ABC transporters; Purine metabolism	1.0114	1.0476	1.0329	0.0376	0.1504	7.0051	6.9109	6.9699	6.951	7.1478	6.6434	6.7795	6.6666	6.863	6.5229	6.5768	6.8959
neg_200	(R)-2,3-Dihydro-3,5-dihydroxy-2-oxo-3-indoleacetic acid	metab_18658	yes	up	-	neg	-	222.041	0.7628	M-H2O-H, M-H	C10H9NO5	-	63.8	HMDB0038941	-	-	-	-	-	Organoheterocyclic compounds	Indoles and derivatives	Indolyl carboxylic acids and derivatives	-	63.8	-	-	2.1284	1.953	1.1204	0.0002545	0.01796	6.2377	5.9634	6.2098	6.3286	6.3915	5.7246	5.6266	5.2405	5.5939	5.4149	5.4294	5.593
neg_389	2-Deoxycastasterone	metab_18846	yes	down	C15793	neg	87734-68-7	447.348	7.21748	M-H, M+Cl	C28H48O4	-	61.3	HMDB0034423	-	-	map01100;map00905;map01110	Metabolism;Metabolism;Metabolism	Global and overview maps;Metabolism of terpenoids and polyketides;Global and overview maps	Lipids and lipid-like molecules	Steroids and steroid derivatives	Bile acids, alcohols and derivatives	-	61.3	Metabolic pathways; Brassinosteroid biosynthesis; Biosynthesis of secondary metabolites	Metabolic pathways; Brassinosteroid biosynthesis; Biosynthesis of secondary metabolites	1.3661	1.2322	0.9497	0.01708	0.103	6.4537	6.1441	6.4265	6.4186	5.9172	6.4548	6.6886	6.7444	6.3374	6.8404	6.6877	6.5196
neg_408	Camellenodiol	metab_18865	yes	down	-	neg	81426-91-7	441.338	7.33393	M-H, 2M-H	C29H46O3	-	54.6	HMDB0035735	-	-	-	-	-	Lipids and lipid-like molecules	Prenol lipids	Triterpenoids	-	54.6	-	-	1.4964	1.3747	0.9457	0.01399	0.09312	7.0738	7.1163	7.1129	7.0105	7.2758	6.9687	7.2365	7.4157	7.2334	7.9065	7.8963	7.3116
neg_624	Sulfate	metab_19080	yes	up	C00059	neg	14808-79-8	194.927	0.556517	2M-H	H2O4S	-	53.6	HMDB0001448	-	-	map01100;map01110;map00230;map01120;map00270;map02024;map02010;map00261;map00920	Metabolism;Metabolism;Metabolism;Metabolism;Metabolism;Cellular Processes;Environmental Information Processing;Metabolism;Metabolism	Global and overview maps;Global and overview maps;Nucleotide metabolism;Global and overview maps;Amino acid metabolism;Cellular community - prokaryotes;Membrane transport;Biosynthesis of other secondary metabolites;Energy metabolism	Homogeneous non-metal compounds	Non-metal oxoanionic compounds	Non-metal sulfates	-	53.6	Metabolic pathways; Biosynthesis of secondary metabolites; Purine metabolism; Microbial metabolism in diverse environments; Cysteine and methionine metabolism; Quorum sensing; ABC transporters; Monobactam biosynthesis; Sulfur metabolism	Metabolic pathways; Biosynthesis of secondary metabolites; Purine metabolism; Microbial metabolism in diverse environments; Cysteine and methionine metabolism; Quorum sensing; ABC transporters; Monobactam biosynthesis; Sulfur metabolism	2.2651	2.014	1.2413	0.03327	0.1409	3.5678	4.599	4.4114	5.2099	5.7865	5.5306	4.2813	3.1585	3.5823	4.1649	3.9855	4.2747
neg_642	N-acetylaspartate	metab_19098	yes	down	C01042	neg	-	174.04	0.567217	M-H	C6H9NO5	95.8	-	HMDB0000812	-	-	map01100;map00250	Metabolism;Metabolism	Global and overview maps;Amino acid metabolism	Organic acids and derivatives	Carboxylic acids and derivatives	Amino acids, peptides, and analogues	95.8	-	Metabolic pathways; Alanine, aspartate and glutamate metabolism	Metabolic pathways; Alanine, aspartate and glutamate metabolism	1.7418	1.5827	0.9185	0.001747	0.03614	5.4074	5.562	5.195	4.814	5.3267	5.2891	5.7718	5.8071	5.5427	5.7649	5.7596	5.7523
neg_649	N-Acetyl-L-glutamic acid	metab_19105	yes	down	C00624	neg	1188-37-0	188.056	0.5739	M-H	C7H11NO5	85.4	-	HMDB0001138	-	-	map01100;map01210;map00220;map01110;map01230	Metabolism;Metabolism;Metabolism;Metabolism;Metabolism	Global and overview maps;Global and overview maps;Amino acid metabolism;Global and overview maps;Global and overview maps	Organic acids and derivatives	Carboxylic acids and derivatives	Amino acids, peptides, and analogues	85.4	-	Metabolic pathways; 2-Oxocarboxylic acid metabolism; Arginine biosynthesis; Biosynthesis of secondary metabolites; Biosynthesis of amino acids	Metabolic pathways; 2-Oxocarboxylic acid metabolism; Arginine biosynthesis; Biosynthesis of secondary metabolites; Biosynthesis of amino acids	1.152	1.0497	0.9575	0.03126	0.1366	6.1487	6.2645	5.9269	5.5448	6.0261	6.1392	6.3161	6.3533	6.2301	6.2718	6.1967	6.2819
neg_661	5-L-Glutamyl-L-alanine	metab_19117	yes	down	C03740	neg	-	217.083	0.5947	M-H	C8H14N2O5	68.3	-	HMDB0006248	-	-	map01100;map00480	Metabolism;Metabolism	Global and overview maps;Metabolism of other amino acids	Organic acids and derivatives	Carboxylic acids and derivatives	Amino acids, peptides, and analogues	68.3	-	Metabolic pathways; Glutathione metabolism	Metabolic pathways; Glutathione metabolism	1.7766	1.6589	0.908	0.002388	0.04056	5.0011	5.189	4.9694	4.9434	5.0474	5.5103	5.7757	5.637	5.2804	5.785	5.8648	5.4245
neg_758	Taurine	metab_19214	yes	up	C00245	neg	107-35-7	124.007	0.651083	M-H	C2H7NO3S	77.2	-	HMDB0000251	-	-	map01100;map00920;map00430;map02010;map00120;map04080	Metabolism;Metabolism;Metabolism;Environmental Information Processing;Metabolism;Environmental Information Processing	Global and overview maps;Energy metabolism;Metabolism of other amino acids;Membrane transport;Lipid metabolism;Signaling molecules and interaction	Organic acids and derivatives	Organic sulfonic acids and derivatives	Organosulfonic acids and derivatives	77.2	-	Metabolic pathways; Sulfur metabolism; Taurine and hypotaurine metabolism; ABC transporters; Primary bile acid biosynthesis; Neuroactive ligand-receptor interaction	Metabolic pathways; Sulfur metabolism; Taurine and hypotaurine metabolism; ABC transporters; Primary bile acid biosynthesis; Neuroactive ligand-receptor interaction	1.9891	1.8648	1.1385	0.01864	0.1074	6.4066	5.6231	5.9774	6.7142	6.6753	6.4807	5.6762	5.0992	5.7025	5.0713	5.2862	6.4373
neg_902	Deoxyadenosine monophosphate	metab_19354	yes	down	C00360	neg	653-63-4	330.061	0.767583	M-H	C10H14N5O6P	80.9	-	HMDB0000905	Nucleic acids	Nucleotides	map01100;map00230	Metabolism;Metabolism	Global and overview maps;Nucleotide metabolism	Nucleosides, nucleotides, and analogues	Purine nucleotides	Purine deoxyribonucleotides	80.9	-	Metabolic pathways; Purine metabolism	Metabolic pathways; Purine metabolism	2.8358	2.5706	0.7154	0.02013	0.1117	4.3343	3.1395	3.1458	3.2537	3.1641	4.8269	5.3431	4.7524	3.1287	5.5732	5.8987	5.8666
neg_1071	O-Cresol	metab_19520	yes	up	C01542	neg	95-48-7	107.049	1.4941	M-H	C7H8O	90.1	-	HMDB0002055	-	-	map01100;map01220;map00623;map01120	Metabolism;Metabolism;Metabolism;Metabolism	Global and overview maps;Global and overview maps;Xenobiotics biodegradation and metabolism;Global and overview maps	Benzenoids	Phenols	Cresols	90.1	-	Metabolic pathways; Degradation of aromatic compounds; Toluene degradation; Microbial metabolism in diverse environments	Metabolic pathways; Degradation of aromatic compounds; Toluene degradation; Microbial metabolism in diverse environments	1.304	1.1911	1.0576	0.01804	0.1059	5.6758	5.7146	5.5905	6.2327	5.7506	5.7376	5.3904	5.401	5.6812	5.3409	5.6415	5.3582
neg_1583	Gravacridonetriol glucoside	metab_20029	yes	down	-	neg	59086-96-3	554.141	4.79632	M+Cl	C25H29NO11	-	66.4	HMDB0029331	-	-	-	-	-	Lipids and lipid-like molecules	Glycerolipids	Glycosylglycerols	-	66.4	-	-	1.3021	1.4417	0.9316	0.04582	0.1664	4.9645	5.4009	5.1981	5.3012	5.3734	5.4069	5.8109	5.2379	5.4586	5.6412	5.4886	6.3278
neg_1630	2-(4-Hydroxyphenyl)ethanol	metab_20076	yes	down	C06044	neg	-	137.06	5.0286	M-H	C8H10O2	65.4	-	HMDB0004284	-	-	map01100;map00350	Metabolism;Metabolism	Global and overview maps;Amino acid metabolism	Benzenoids	Phenols	Tyrosols and derivatives	65.4	-	Metabolic pathways; Tyrosine metabolism	Metabolic pathways; Tyrosine metabolism	2.0612	1.8931	0.8883	0.0002388	0.01744	4.9023	4.9982	4.7351	4.743	4.8551	5.2476	5.4841	5.7122	5.4485	5.6156	5.7229	5.2116
neg_1741	3,5-dihydroxydecanoic acid	metab_20186	yes	up	-	neg	-	185.118	5.67865	M-H2O-H	C10H20O4	85.1	-	-	-	-	-	-	-	-	-	-	85.1	-	-	-	1.1466	1.0594	1.0511	0.0267	0.1274	4.7134	4.9574	4.8868	5.0756	5.1937	5.0216	4.8416	4.7067	4.8982	4.5236	4.5763	4.8538
neg_1776	Geosmin	metab_20221	yes	up	C16286	neg	19700-21-1	227.165	5.89238	M+FA-H	C12H22O	-	57.4	HMDB0036461	-	-	map01110;map00909	Metabolism;Metabolism	Global and overview maps;Metabolism of terpenoids and polyketides	Organic oxygen compounds	Organooxygen compounds	Alcohols and polyols	-	57.4	Biosynthesis of secondary metabolites; Sesquiterpenoid and triterpenoid biosynthesis	Biosynthesis of secondary metabolites; Sesquiterpenoid and triterpenoid biosynthesis	1.3179	1.1814	1.0795	0.04691	0.1676	4.4895	4.619	4.7131	4.8513	5.2056	4.9005	4.7169	4.1218	4.3218	4.2286	4.4029	4.864
neg_1887	{2-hydroxy-5-[3-(2-hydroxyphenyl)propanoyl]phenyl}oxidanesulfonic acid	metab_20331	yes	down	-	neg	-	337.039	6.22768	M-H	C15H14O7S	-	63.4	HMDB0135421	-	-	-	-	-	Phenylpropanoids and polyketides	Linear 1,3-diarylpropanoids	Chalcones and dihydrochalcones	-	63.4	-	-	1.8315	1.6852	0.8778	0.03505	0.1447	4.9924	4.2276	4.9127	4.961	4.9633	5.0662	6.1256	5.055	4.7222	5.2801	6.2127	5.7838
neg_1923	1-Methoxy-3-carbaldehyde	metab_20366	yes	up	-	neg	-	220.061	6.26075	M+FA-H	C10H9NO2	52.7	-	-	-	-	-	-	-	-	-	-	52.7	-	-	-	1.7067	1.5741	1.0853	0.001179	0.03215	5.8481	5.7136	5.7777	5.7775	5.7582	5.4835	5.2967	5.2368	5.6171	5.0877	5.034	5.3816
neg_1947	[2-hydroxy-5-(7-hydroxy-4-oxo-4H-chromen-2-yl)phenyl]oxidanesulfonic acid	metab_20390	yes	up	-	neg	-	349.002	6.2729	M-H	C15H10O8S	-	56.4	HMDB0133329	-	-	-	-	-	Phenylpropanoids and polyketides	Flavonoids	Flavones	-	56.4	-	-	2.4411	2.2838	1.285	0.006116	0.06206	5.2612	4.4885	4.983	4.9224	5.054	3.9622	4.3933	3.2692	3.2178	3.7212	3.2452	4.4664
neg_1998	(2-oxo-2,3-dihydro-1H-indol-3-yl)acetic acid	metab_20437	yes	up	-	neg	-	172.04	6.31642	M-H2O-H	C10H9NO3	84.6	-	-	-	-	-	-	-	-	-	-	84.6	-	-	-	1.1784	1.1378	1.0692	0.02675	0.1274	5.0694	4.7768	4.6431	4.4694	4.5339	4.4127	4.498	4.4161	4.422	4.1774	4.1463	4.4374
neg_2136	Ononetin	metab_20564	yes	down	-	neg	-	257.082	6.41662	M-H	C15H14O4	61.4	-	-	-	-	-	-	-	-	-	-	61.4	-	-	-	1.9302	1.7467	0.9097	0.0008412	0.02839	5.8783	5.6428	5.422	5.2887	5.6173	5.4112	5.9684	6.0371	6.0157	6.3826	6.2711	5.8812
neg_2327	16,16-dimethyl-PGA1	metab_20738	yes	down	-	neg	-	363.254	6.58752	M-H	C22H36O4	81.6	-	LMFA03010085	-	-	-	-	-	-	-	-	81.6	-	-	-	1.2362	1.1154	0.9508	0.01339	0.09146	5.2774	5.3937	5.4623	5.0532	5.0944	5.2333	5.5496	5.7798	5.4275	5.3994	5.6023	5.3849
neg_2447	13,14-Dihydro PGF-1a	metab_20847	yes	down	-	neg	-	339.254	6.68677	M-H2O-H	C20H38O5	-	82.1	HMDB0005076	-	-	-	-	-	Lipids and lipid-like molecules	Fatty Acyls	Eicosanoids	-	82.1	-	-	1.3259	1.1947	0.949	0.002319	0.04037	5.1408	5.1611	5.0287	4.9924	5.0586	4.9841	5.3818	5.3406	5.18	5.2567	5.5927	5.2445
neg_2530	17,23-Epoxy-29-hydroxy-27-norlanost-8-ene-3,15,24-trione	metab_20926	yes	down	-	neg	-	491.278	6.76082	M+Na-2H	C29H42O5	-	58.5	HMDB0035113	-	-	-	-	-	Lipids and lipid-like molecules	Prenol lipids	Triterpenoids	-	58.5	-	-	1.1939	1.2021	0.9537	0.03921	0.1523	5.9716	6.3189	5.7841	6.0344	6.2318	6.1203	6.38	6.3353	6.3519	5.9632	6.5359	6.6634
neg_2558	[2,4-dihydroxy-1-(1-oxo-1H-isochromen-3-yl)butoxy]sulfonic acid	metab_20950	yes	up	-	neg	-	375.042	6.80087	M+FA-H	C13H14O8S	-	56.8	HMDB0130089	-	-	-	-	-	Phenylpropanoids and polyketides	Isocoumarins and derivatives	Not Available	-	56.8	-	-	1.2093	1.1733	1.0723	0.02718	0.1279	4.978	4.3797	5.0943	4.9957	4.7644	4.5419	4.4867	4.6921	4.3688	4.4169	4.3963	4.4533
neg_2559	1-nonadecanoyl-glycero-3-phosphate	metab_20951	yes	down	-	neg	-	497.289	6.80087	M+FA-H	C22H45O7P	-	76.2	HMDB0062322;LMGP10050034;HMDB0114746	-	-	-	-	-	Lipids and lipid-like molecules	Glycerophospholipids	Glycerophosphates	-	76.2	-	-	1.9878	1.8395	0.9012	0.002931	0.04433	5.8298	6.6922	5.7719	5.8397	5.5175	6.0232	6.6085	6.6069	6.4359	6.6688	6.6456	6.6203
neg_2587	1-Stearoylglycerophosphoglycerol	metab_20977	yes	down	-	neg	-	511.304	6.85497	M-H	C24H49O9P	-	89.1	HMDB0061697	-	-	-	-	-	Lipids and lipid-like molecules	Glycerophospholipids	Glycerophosphoglycerols	-	89.1	-	-	1.2896	1.2095	0.9559	0.009189	0.07527	6.4705	6.8233	6.4637	6.5695	6.7927	6.9569	7.0805	6.9969	6.7802	7.0825	7.0161	6.9684
neg_2594	9,10-Eode	metab_20984	yes	down	-	neg	-	295.228	6.86557	M-H	C18H32O3	65.2	-	-	-	-	-	-	-	-	-	-	65.2	-	-	-	1.3282	1.4031	0.9493	0.01897	0.1084	6.085	5.6975	6.1457	6.114	5.7074	5.652	6.3608	6.4006	6.2214	6.1311	6.0432	6.1303
neg_2667	Phosphatidylethanolamine lyso 20:4	metab_21051	yes	down	-	neg	-	500.278	6.923	M-H	C25H44NO7P	68.1	-	-	-	-	-	-	-	-	-	-	68.1	-	-	-	1.7838	1.6002	0.9207	0.001566	0.03545	5.5856	5.4334	5.3674	5.7034	5.4053	5.8135	5.9945	6.1011	5.6732	6.059	6.3006	6.0442
neg_2712	13(S)-HODE	metab_21091	yes	down	C14762	neg	-	295.228	6.96643	M-H	C18H32O3	78	-	-	-	-	map00591;map03320	Metabolism;Organismal Systems	Lipid metabolism;Endocrine system	-	-	-	78	-	Linoleic acid metabolism; PPAR signaling pathway	Linoleic acid metabolism; PPAR signaling pathway	1.4554	1.3997	0.9461	0.006687	0.06485	6.2871	5.8017	6.2952	6.258	6.0181	6.073	6.6702	6.6262	6.355	6.5146	6.3671	6.2911
neg_2725	Phosphatidylethanolamine lyso 20:3	metab_21104	yes	down	-	neg	-	502.294	6.97398	M-H	C25H46NO7P	57.6	-	-	-	-	-	-	-	-	-	-	57.6	-	-	-	1.6126	1.45	0.9171	0.01738	0.104	5.5058	4.7735	4.9349	5.1394	5.0774	5.8436	5.7635	5.6978	5.5297	5.6239	5.7598	5.7206
neg_2775	DG(i-24:0/8:0/0:0)	metab_21152	yes	down	-	neg	-	589.484	7.01338	M+Na-2H	C35H68O5	-	57.5	HMDB0094522	-	-	-	-	-	Lipids and lipid-like molecules	Glycerolipids	Diradylglycerols	-	57.5	-	-	1.835	1.702	0.9001	0.02843	0.1303	6.1163	5.5695	5.9107	5.6236	5.3766	6.5032	6.8416	6.4681	5.5916	6.7878	6.6961	6.6106
neg_2790	Rollidecin D	metab_21166	yes	down	-	neg	200703-17-9	587.469	7.02868	M-H2O-H	C37H66O6	-	71.4	HMDB0031886	-	-	-	-	-	Lipids and lipid-like molecules	Fatty Acyls	Fatty alcohols	-	71.4	-	-	1.9476	1.7944	0.8895	0.02456	0.1223	6.031	5.4347	5.832	5.553	5.3254	6.5071	6.8465	6.4549	5.5199	6.7956	6.7225	6.6545
neg_2811	Dehydrophytosphingosine	metab_21185	yes	down	-	neg	3687-54-5	314.27	7.04802	M-H	C18H37NO3	-	73	LMSP01030002;HMDB0038057	-	-	-	-	-	Organic nitrogen compounds	Organonitrogen compounds	Amines	-	73	-	-	2.2442	2.0479	0.8052	0.01279	0.0891	4.0715	4.0105	3.3511	3.5955	3.6106	3.555	4.1335	4.9287	4.6333	4.9891	5.3607	3.5172
neg_2866	1-(9Z,12Z-Octadecadienoyl-2-hydroxy-sn-glycero-3-phosphocholine	metab_21239	yes	down	-	neg	-	518.325	7.09757	M-H	C26H50NO7P	70.6	-	-	-	-	-	-	-	-	-	-	70.6	-	-	-	1.9041	1.7181	0.9135	0.0009796	0.03008	5.9	5.6792	5.5281	5.6221	5.3349	5.7675	6.0471	6.2249	6.01	6.3008	6.4975	5.9571
neg_2994	DG(16:1(9Z)/18:3(6Z,9Z,12Z)/0:0)	metab_21355	yes	down	-	neg	-	569.458	7.22143	M-H2O-H	C37H64O5	-	70.6	HMDB0007133	-	-	-	-	-	Lipids and lipid-like molecules	Fatty Acyls	Lineolic acids and derivatives	-	70.6	-	-	2.0272	1.8934	0.8707	0.02475	0.1228	5.3844	5.1644	5.4964	4.8884	5.0379	6.2214	6.4341	6.0429	5.0594	6.4691	6.4711	6.4929
neg_3094	DG(16:0/18:3(9Z,12Z,15Z)/0:0)	metab_21444	yes	down	-	neg	-	571.474	7.31833	M-H2O-H	C37H66O5	-	60.2	HMDB0007105	-	-	-	-	-	Lipids and lipid-like molecules	Fatty Acyls	Lineolic acids and derivatives	-	60.2	-	-	1.7932	1.6543	0.9094	0.02071	0.1131	6.1072	5.91	6.1785	5.8762	5.9302	6.7425	6.9971	6.613	5.8949	6.9253	6.9874	6.9873
neg_3187	Montecristin	metab_21533	yes	down	-	neg	185336-15-6	573.489	7.39502	M-H	C37H66O4	-	52	HMDB0029795	-	-	-	-	-	Lipids and lipid-like molecules	Fatty Acyls	Fatty alcohols	-	52	-	-	2.3893	2.1959	0.8224	0.0179	0.1055	4.966	4.4303	4.9128	4.3756	4.8928	6.0696	6.3814	5.7647	4.6891	6.4036	6.4213	6.3881
neg_3195	Schleicherastatin 3	metab_21540	yes	down	-	neg	256445-53-1	445.369	7.40352	M-H	C29H50O3	-	53.8	HMDB0035512	-	-	-	-	-	Lipids and lipid-like molecules	Steroids and steroid derivatives	Bile acids, alcohols and derivatives	-	53.8	-	-	2.1253	2.334	0.8644	0.01374	0.09268	5.5015	5.2247	5.389	5.4794	4.9776	3.8298	5.8669	5.7346	6.1221	5.8749	5.7233	5.8486
neg_3221	27-Nor-5b-cholestane-3a,7a,12a,24,25-pentol	metab_21563	yes	down	-	neg	78648-95-0	419.317	7.43552	M-H2O-H	C26H46O5	-	61.9	HMDB0002126;LMST01010213	-	-	-	-	-	Lipids and lipid-like molecules	Steroids and steroid derivatives	Bile acids, alcohols and derivatives	-	61.9	-	-	2.0722	1.996	0.863	0.01843	0.1068	5.2002	4.8943	5.0567	4.5976	4.4176	5.7233	5.8849	5.8171	4.8245	6.1431	6.2683	5.7012
neg_3614	(3beta,5alpha,6beta,22E,24R)-23-Methylergosta-7,22-diene-3,5,6-triol	metab_21937	yes	down	-	neg	243449-54-9	443.353	8.43188	M-H	C29H48O3	-	62	HMDB0033633	-	-	-	-	-	Lipids and lipid-like molecules	Steroids and steroid derivatives	Ergostane steroids	-	62	-	-	1.433	1.4206	0.9502	0.0002011	0.01666	5.6932	5.5209	5.572	5.48	5.4908	5.4795	5.7746	5.6957	5.9028	5.8024	5.8434	5.9564
neg_4158	MG(P-18:0e/0:0/0:0)	metab_22470	yes	down	-	neg	-	341.306	7.7547	M-H	C21H42O3	-	59.2	-	-	-	-	-	-	-	-	-	-	59.2	-	-	1.2602	1.1731	0.9551	0.007157	0.06682	5.8977	6.2274	5.8243	5.9546	5.8442	6.1274	6.2218	6.3464	6.2339	6.211	6.4507	6.0957
neg_4177	Ceramide (d18:1/9Z-18:1)	metab_22489	yes	down	C00195	neg	-	608.527	7.69597	M+FA-H	C36H69NO3	-	52.1	HMDB0004948	-	-	map01100;map05140;map00600;map04933;map04920;map04071;map04217;map04722;map04931	Metabolism;Human Diseases;Metabolism;Human Diseases;Organismal Systems;Environmental Information Processing;Cellular Processes;Organismal Systems;Human Diseases	Global and overview maps;Infectious disease: parasitic;Lipid metabolism;Endocrine and metabolic disease;Endocrine system;Signal transduction;Cell growth and death;Nervous system;Endocrine and metabolic disease	Lipids and lipid-like molecules	Sphingolipids	Ceramides	-	52.1	Metabolic pathways; Leishmaniasis; Sphingolipid metabolism; AGE-RAGE signaling pathway in diabetic complications; Adipocytokine signaling pathway; Sphingolipid signaling pathway; Necroptosis; Neurotrophin signaling pathway; Insulin resistance	Metabolic pathways; Leishmaniasis; Sphingolipid metabolism; AGE-RAGE signaling pathway in diabetic complications; Adipocytokine signaling pathway; Sphingolipid signaling pathway; Necroptosis; Neurotrophin signaling pathway; Insulin resistance	1.3383	1.2157	0.934	0.04381	0.1616	5.4858	4.8714	5.1584	4.9286	4.9918	5.5565	5.6727	5.5733	5.165	5.9085	5.3796	5.4836
neg_4257	22-Angeloylbarringtogenol C	metab_22565	yes	down	-	neg	200492-43-9	553.39	7.56292	M-H2O-H	C35H56O6	-	76.9	HMDB0032835	-	-	-	-	-	Lipids and lipid-like molecules	Prenol lipids	Triterpenoids	-	76.9	-	-	2.2747	2.1264	0.7937	0.04187	0.1577	4.181	4.6536	5.1556	3.1165	3.4116	5.8675	5.9585	6.0536	5.0525	5.9658	4.5977	5.6198
neg_4346	3-hydroxypristanic acid	metab_22647	yes	up	-	neg	-	673.563	7.49137	2M+FA-H	C19H38O3	-	53.5	HMDB0061651	-	-	-	-	-	Lipids and lipid-like molecules	Prenol lipids	Diterpenoids	-	53.5	-	-	1.088	0.9862	1.037	0.02012	0.1117	6.1905	6.1658	6.2442	6.1133	6.0898	6.1545	6.0502	6.0435	6.0505	6.0555	5.5981	5.8421
neg_4525	7-a,25-Dihydroxycholesterol	metab_22809	yes	down	C16678	neg	64907-22-8	417.337	7.32313	M-H	C27H46O3	-	68	HMDB0006280	-	-	map01100;map00830	Metabolism;Metabolism	Global and overview maps;Metabolism of cofactors and vitamins	Lipids and lipid-like molecules	Prenol lipids	Retinoids	-	68	Metabolic pathways; Retinol metabolism	Metabolic pathways; Retinol metabolism	1.117	0.985	0.9634	0.01597	0.09994	5.692	5.7191	5.6779	5.6218	5.6033	5.6588	5.9881	6.12	5.605	5.8183	5.9238	5.8073
neg_4540	2-Hydroxy-5 (6)Epoxy-Tetrahydrocaryophyllene	metab_22824	yes	down	-	neg	-	475.379	7.31257	2M-H	C15H26O2	50.6	-	-	-	-	-	-	-	-	-	-	50.6	-	-	-	1.971	1.7958	0.851	0.02683	0.1274	4.6686	3.7993	4.271	3.8079	3.936	4.8423	4.7559	5.4572	4.9563	5.5579	4.0817	4.9493
neg_4574	Gamma-Tocopheryl quinone	metab_22858	yes	down	-	neg	-	477.359	7.29183	M+FA-H	C28H48O3	-	52.8	HMDB0033998	-	-	-	-	-	Lipids and lipid-like molecules	Prenol lipids	Diterpenoids	-	52.8	-	-	1.0574	1.1392	0.9665	0.03336	0.1412	6.5425	6.5274	6.3985	6.5362	6.5271	6.0253	6.6959	6.6301	6.73	6.7094	6.6388	6.491
neg_4867	DG(14:0/20:2(11Z,14Z)/0:0)	metab_23129	yes	down	-	neg	-	591.5	7.06027	M-H	C37H68O5	-	55.1	HMDB0007022	-	-	-	-	-	Lipids and lipid-like molecules	Glycerolipids	Diradylglycerols	-	55.1	-	-	2.4679	2.2939	0.8046	0.02185	0.1157	5.274	4.4508	5.0332	3.8226	3.8385	5.9604	6.2586	5.8224	4.7012	6.2287	6.1735	6.0907
neg_4960	Dihydroceramide	metab_23214	yes	up	C12126	neg	-	364.265	6.98703	M+Cl	C19H39NO3	-	73	HMDB0006752;HMDB0011761	-	-	map00600;map01100;map04071	Metabolism;Metabolism;Environmental Information Processing	Lipid metabolism;Global and overview maps;Signal transduction	Organic acids and derivatives	Carboxylic acids and derivatives	Carboxylic acid derivatives	-	73	Sphingolipid metabolism; Metabolic pathways; Sphingolipid signaling pathway	Sphingolipid metabolism; Metabolic pathways; Sphingolipid signaling pathway	1.1783	1.0352	1.0376	0.005496	0.05796	5.7978	5.8046	5.8682	5.6971	5.8754	5.9279	5.6949	5.4953	5.8123	5.6435	5.5265	5.5289
neg_5100	LysoPE(16:1(9Z)/0:0)	metab_23345	yes	down	-	neg	-	450.263	6.87888	M-H	C21H42NO7P	-	76.6	HMDB0011504	-	-	-	-	-	Lipids and lipid-like molecules	Glycerophospholipids	Glycerophosphoethanolamines	-	76.6	-	-	1.395	1.2909	0.9523	0.001062	0.03053	5.9388	5.9537	5.8022	6.008	5.9658	6.2495	6.2795	6.2423	6.1842	6.2937	6.3521	6.365
neg_5182	7Z, 10Z, 13Z, 16Z, 19Z-docosapentaenoic acid	metab_23419	yes	down	-	neg	-	329.249	6.79228	M-H	C22H34O2	55.6	-	-	-	-	-	-	-	-	-	-	55.6	-	-	-	1.0262	0.9862	0.9723	0.02121	0.1147	7.289	7.4236	7.3252	7.1849	7.2928	7.3451	7.4955	7.5766	7.3712	7.8009	7.5345	7.3264
neg_5388	3Beta-Hydroxy-23,24-Bisnorchol-5-Enic Acid	metab_23611	yes	down	-	neg	-	345.244	6.63898	M-H	C22H34O3	52.7	-	-	-	-	-	-	-	-	-	-	52.7	-	-	-	1.3356	1.2223	0.9523	0.002602	0.04179	5.7311	5.7953	5.7034	5.5061	5.5602	5.6981	6.0263	6.063	5.7912	6.0811	5.9685	5.7715
neg_5569	Linolenic acid	metab_23773	yes	down	C06427	neg	-	323.223	6.50412	M+FA-H	C18H30O2	61.6	-	HMDB0001388	Lipids	Fatty acids	map01100;map01110;map00592;map01040;map01070;map01060	Metabolism;Metabolism;Metabolism;Metabolism;Metabolism;Metabolism	Global and overview maps;Global and overview maps;Lipid metabolism;Lipid metabolism;Chemical structure transformation maps;Chemical structure transformation maps	Lipids and lipid-like molecules	Fatty Acyls	Lineolic acids and derivatives	61.6	-	Metabolic pathways; Biosynthesis of secondary metabolites; alpha-Linolenic acid metabolism; Biosynthesis of unsaturated fatty acids; Biosynthesis of plant hormones; Biosynthesis of plant secondary metabolites	Metabolic pathways; Biosynthesis of secondary metabolites; alpha-Linolenic acid metabolism; Biosynthesis of unsaturated fatty acids; Biosynthesis of plant hormones; Biosynthesis of plant secondary metabolites	1.2987	1.2061	0.9435	0.01493	0.09659	5.2772	4.7806	5.1945	5.0563	4.8172	5.1387	5.6244	5.3464	5.1897	5.3624	5.2876	5.2683
neg_5632	Ganoderic acid H	metab_23831	yes	up	-	neg	98665-19-1	553.284	6.46058	M-H2O-H	C32H44O9	-	82.8	HMDB0035987	-	-	-	-	-	Lipids and lipid-like molecules	Prenol lipids	Triterpenoids	-	82.8	-	-	1.7172	1.6047	1.1092	0.01235	0.08728	5.0969	5.6451	5.2077	6.0608	5.417	5.1795	4.8849	5.2617	5.0005	4.7178	4.9216	4.6097
neg_5719	Leu-Leu-Leu	metab_23909	yes	down	-	neg	-	356.255	6.39555	M-H	C18H35N3O4	-	65.6	HMDB0094648	-	-	-	-	-	Organic acids and derivatives	Carboxylic acids and derivatives	Amino acids, peptides, and analogues	-	65.6	-	-	2.2824	2.1216	0.8478	0.001704	0.03612	4.4268	4.9062	4.6749	4.1229	4.7359	5.1079	5.6	5.6329	4.9746	5.7706	5.8089	5.2098
neg_6392	Gentisic acid	metab_24565	yes	up	C00628	neg	490-79-9	153.019	4.34582	M-H	C7H6O4	69.8	-	HMDB0000152;HMDB0059999	-	-	map00626;map00362;map01100;map01120;map00350	Metabolism;Metabolism;Metabolism;Metabolism;Metabolism	Xenobiotics biodegradation and metabolism;Xenobiotics biodegradation and metabolism;Global and overview maps;Global and overview maps;Amino acid metabolism	Benzenoids	Benzene and substituted derivatives	Benzoic acids and derivatives	69.8	-	Naphthalene degradation; Benzoate degradation; Metabolic pathways; Microbial metabolism in diverse environments; Tyrosine metabolism	Naphthalene degradation; Benzoate degradation; Metabolic pathways; Microbial metabolism in diverse environments; Tyrosine metabolism	1.1622	1.0933	1.0525	0.03638	0.1468	5.3255	5.318	5.298	5.3004	5.5975	5.2744	5.4754	4.9387	5.1255	4.8851	4.8477	5.236
neg_6784	Xanthosine	metab_24954	yes	down	C01762	neg	146-80-5	283.068	2.2867	M-H	C10H12N4O6	90	-	HMDB0000299	-	-	map01100;map01110;map00230;map00232;map02010;map01065	Metabolism;Metabolism;Metabolism;Metabolism;Environmental Information Processing;Metabolism	Global and overview maps;Global and overview maps;Nucleotide metabolism;Biosynthesis of other secondary metabolites;Membrane transport;Chemical structure transformation maps	Nucleosides, nucleotides, and analogues	Purine nucleosides	Not Available	90	-	Metabolic pathways; Biosynthesis of secondary metabolites; Purine metabolism; Caffeine metabolism; ABC transporters; Biosynthesis of alkaloids derived from histidine and purine	Metabolic pathways; Biosynthesis of secondary metabolites; Purine metabolism; Caffeine metabolism; ABC transporters; Biosynthesis of alkaloids derived from histidine and purine	2.9444	2.8179	0.6967	0.01981	0.111	3.1528	5.7566	3.9562	2.7682	2.5351	6.0026	5.3203	5.9181	5.5029	5.8598	6.2759	5.8191
neg_6964	4-Acetyl-2(3H)-benzoxazolone	metab_25133	yes	up	-	neg	70735-79-4	222.041	0.94805	M+FA-H	C9H7NO3	-	61.3	HMDB0040612	-	-	-	-	-	Organoheterocyclic compounds	Benzoxazoles	Benzoxazolones	-	61.3	-	-	2.2149	2.0454	1.1375	0.0001735	0.01648	6.0215	5.6842	5.9323	6.1007	6.1051	5.4537	5.3113	4.9102	5.2288	5.1258	5.1613	5.2955
neg_7054	P-Salicylic acid	metab_25220	yes	up	C00156	neg	-	137.024	0.7628	M-H	C7H6O3	57.1	-	HMDB0000500	-	-	map01100;map01220;map01110;map01120;map00627;map00130;map00623;map00363;map00362;map00790;map07110;map01061	Metabolism;Metabolism;Metabolism;Metabolism;Metabolism;Metabolism;Metabolism;Metabolism;Metabolism;Metabolism;Drug Development;Metabolism	Global and overview maps;Global and overview maps;Global and overview maps;Global and overview maps;Xenobiotics biodegradation and metabolism;Metabolism of cofactors and vitamins;Xenobiotics biodegradation and metabolism;Xenobiotics biodegradation and metabolism;Xenobiotics biodegradation and metabolism;Metabolism of cofactors and vitamins;Skeleton-based classification;Chemical structure transfor…	Benzenoids	Benzene and substituted derivatives	Benzoic acids and derivatives	57.1	-	Metabolic pathways; Degradation of aromatic compounds; Biosynthesis of secondary metabolites; Microbial metabolism in diverse environments; Aminobenzoate degradation; Ubiquinone and other terpenoid-quinone biosynthesis; Toluene degradation; Bisphenol degradation; Benzoate degradation; Folate biosynthesis; Benzoic acid family; Biosynthesis of phenylpropanoids	Metabolic pathways; Degradation of aromatic compounds; Biosynthesis of secondary metabolites; Microbial metabolism in diverse environments; Aminobenzoate degradation; Ubiquinone and other terpenoid-quinone biosynthesis; Toluene degradation; Bisphenol degradation; Benzoate degradation; Folate biosynthesis; Benzoic acid family; Biosynthesis of phenylpropanoids	1.0594	1.0143	1.0521	0.03926	0.1523	5.4591	4.8304	4.99	5.2622	5.0996	4.9949	5.0524	4.7471	4.9567	4.7717	4.7067	4.8841
neg_7082	DTMP	metab_25248	yes	down	C00364	neg	-	321.049	0.755317	M-H	C10H15N2O8P	60.3	-	HMDB0001227	Nucleic acids	Nucleotides	map00240;map01100;map01523	Metabolism;Metabolism;Human Diseases	Nucleotide metabolism;Global and overview maps;Drug resistance: antineoplastic	Nucleosides, nucleotides, and analogues	Pyrimidine nucleotides	Pyrimidine deoxyribonucleotides	60.3	-	Pyrimidine metabolism; Metabolic pathways; Antifolate resistance	Pyrimidine metabolism; Metabolic pathways; Antifolate resistance	3.4602	3.1822	0.6618	0.002136	0.03955	3.6689	4.2484	3.3331	3.0467	2.8916	5.2963	5.7947	5.2529	4.4372	5.9908	6.2217	6.2764
neg_7120	Orotic acid	metab_25286	yes	down	C00295	neg	65-86-1	155.009	0.751817	M-H	C5H4N2O4	64.6	-	HMDB0000226	-	-	map00240;map01100	Metabolism;Metabolism	Nucleotide metabolism;Global and overview maps	Organoheterocyclic compounds	Diazines	Pyrimidines and pyrimidine derivatives	64.6	-	Pyrimidine metabolism; Metabolic pathways	Pyrimidine metabolism; Metabolic pathways	1.6361	1.5378	0.8794	0.03757	0.1504	3.7794	4.1685	4.2381	3.7072	4.6967	5.1039	4.999	5.0005	4.3355	5.0435	4.8949	4.9424
neg_7174	L-Arginine	metab_25338	yes	up	C00062	neg	74-79-3	173.104	0.722983	M-H	C6H14N4O2	69.3	-	HMDB0000517;HMDB0062762;MJDBOTE0000532	Peptides	Amino acids	map01100;map00220;map00997;map05014;map05146;map00472;map02010;map00330;map00331;map01230;map01110;map04974;map00970;map00261;map05142;map05230;map01064;map04150;map01060	Metabolism;Metabolism;Metabolism;Human Diseases;Human Diseases;Metabolism;Environmental Information Processing;Metabolism;Metabolism;Metabolism;Metabolism;Organismal Systems;Genetic Information Processing;Metabolism;Human Diseases;Human Diseases;Metabolism;Environmental Information Processing;Metabolism	Global and overview maps;Amino acid metabolism;Biosynthesis of other secondary metabolites;Neurodegenerative disease;Infectious disease: parasitic;Metabolism of other amino acids;Membrane transport;Amino acid metabolism;Biosynthesis of other secondary metabolites;Global and overview maps;Global and overview maps;Digestive system;Translation;Biosynthesis of other secondary metabolites;Infectious d…	Organic acids and derivatives	Carboxylic acids and derivatives	Amino acids, peptides, and analogues	69.3	-	Metabolic pathways; Arginine biosynthesis; Biosynthesis of various secondary metabolites - part 3; Amyotrophic lateral sclerosis (ALS); Amoebiasis; D-Arginine and D-ornithine metabolism; ABC transporters; Arginine and proline metabolism; Clavulanic acid biosynthesis; Biosynthesis of amino acids; Biosynthesis of secondary metabolites; Protein digestion and absorption; Aminoacyl-tRNA biosynthesis; …	Metabolic pathways; Arginine biosynthesis; Biosynthesis of various secondary metabolites - part 3; Amyotrophic lateral sclerosis (ALS); Amoebiasis; D-Arginine and D-ornithine metabolism; ABC transporters; Arginine and proline metabolism; Clavulanic acid biosynthesis; Biosynthesis of amino acids; Biosynthesis of secondary metabolites; Protein digestion and absorption; Aminoacyl-tRNA biosynthesis; …	1.928	1.7547	1.1339	0.007274	0.06714	5.0819	5.684	5.5091	5.4965	5.5975	4.6815	4.6775	4.8538	5.1214	4.3762	4.5902	4.6469
neg_7201	(2R,3R,4S,5R,6R)-2-(hydroxymethyl)-6-methoxyoxane-3,4,5-triol	metab_25364	yes	down	-	neg	-	193.071	0.708767	M-H	C7H14O6	52.8	-	;MJDBWX000002245	-	-	-	-	-	-	-	-	52.8	-	-	-	1.2358	1.1487	0.9492	0.003027	0.04535	4.7479	4.7909	4.7803	4.6062	4.8844	4.8913	5.0041	5.0292	4.9374	5.2569	5.083	4.9217
neg_7370	D,L-3,4-Dihydroxymandelic acid	metab_25528	yes	down	-	neg	-	165.019	0.623583	M-H2O-H	C8H8O5	58.6	-	-	-	-	-	-	-	-	-	-	58.6	-	-	-	1.5148	1.3622	0.9309	0.001531	0.03517	4.7662	4.5734	4.5004	4.7029	4.5827	4.6922	4.9166	4.9856	4.7835	5.1502	5.2042	4.8413
neg_7375	DCMP	metab_25533	yes	down	C00239	neg	1032-65-1	306.05	0.619117	M-H	C9H14N3O7P	68.7	-	HMDB0001202	Nucleic acids	Nucleotides	map00240;map01100	Metabolism;Metabolism	Nucleotide metabolism;Global and overview maps	Nucleosides, nucleotides, and analogues	Pyrimidine nucleotides	Pyrimidine deoxyribonucleotides	68.7	-	Pyrimidine metabolism; Metabolic pathways	Pyrimidine metabolism; Metabolic pathways	2.7746	2.5435	0.7597	0.002365	0.04056	3.6513	4.2007	3.7111	3.5045	3.882	4.4188	5.0071	4.7018	4.0762	5.5516	5.7956	5.6272
neg_7404	1-(sn-Glycero-3-phospho)-1D-myo-inositol	metab_25562	yes	up	C01225	neg	-	333.059	0.608683	M-H	C9H19O11P	-	52.4	HMDB0011649	-	-	-	-	-	Lipids and lipid-like molecules	Glycerophospholipids	Glycerophosphoinositols	-	52.4	-	-	1.2919	1.2102	1.0618	0.01229	0.08712	5.1545	4.8764	5.0469	5.1966	4.9545	5.1683	5.1554	4.6042	4.6514	4.7859	4.6983	4.7317
neg_7478	Methylphosphate	metab_25634	yes	down	-	neg	812-00-0	110.985	0.563467	M-H	CH5O4P	-	51	HMDB0061711	-	-	-	-	-	Organic acids and derivatives	Organic phosphoric acids and derivatives	Phosphate esters	-	51	-	-	2.2392	2.1179	0.8054	0.007897	0.06967	3.4291	3.963	3.8484	3.2942	3.485	4.5042	4.9679	4.3983	3.7916	4.9884	5.1356	4.6869
neg_7482	D-Myoinositol 4-phosphate	metab_25638	yes	down	C03546	neg	-	259.022	0.559783	M-H	C6H13O9P	66.3	-	HMDB0001313	-	-	map01100;map04070;map00562	Metabolism;Environmental Information Processing;Metabolism	Global and overview maps;Signal transduction;Carbohydrate metabolism	Organic oxygen compounds	Organooxygen compounds	Alcohols and polyols	66.3	-	Metabolic pathways; Phosphatidylinositol signaling system; Inositol phosphate metabolism	Metabolic pathways; Phosphatidylinositol signaling system; Inositol phosphate metabolism	3.0062	2.7633	0.7375	0.002349	0.04051	3.8287	3.7415	3.9003	3.9498	3.5949	5.5333	5.8748	5.7942	4.5857	6.0017	5.5971	5.4295
neg_7486	Glycerol 3-phosphate	metab_25642	yes	down	C00093	neg	1957-03-04	171.006	0.559783	M-H	C3H9O6P	64.2	-	HMDB0000126	-	-	map01100;map00564;map01110;map00561;map02010;map05231	Metabolism;Metabolism;Metabolism;Metabolism;Environmental Information Processing;Human Diseases	Global and overview maps;Lipid metabolism;Global and overview maps;Lipid metabolism;Membrane transport;Cancer: overview	Lipids and lipid-like molecules	Glycerophospholipids	Glycerophosphates	64.2	-	Metabolic pathways; Glycerophospholipid metabolism; Biosynthesis of secondary metabolites; Glycerolipid metabolism; ABC transporters; Choline metabolism in cancer	Metabolic pathways; Glycerophospholipid metabolism; Biosynthesis of secondary metabolites; Glycerolipid metabolism; ABC transporters; Choline metabolism in cancer	2.0249	1.9677	0.807	0.03478	0.1441	3.0944	3.2645	3.4672	3.4944	3.6726	4.5508	4.3515	4.3395	3.2885	5.2758	5.0493	4.3972
neg_81	L-Glutamate	metab_25712	yes	down	C00025	neg	-	146.045	0.598417	M-H2O-H, M-H	C5H9NO4	80	-	HMDB0000148;HMDB0003339;HMDB0060475	Peptides;Hormones and transmitters	Amino acids;Neurotransmitters	map00997;map01200;map00330;map00480;map00332;map04742;map00250;map05033;map04974;map04072;map04216;map00630;map00430;map04964;map00471;map02010;map00860;map04080;map05016;map05017;map05014;map04727;map01064;map04723;map05031;map04721;map01060;map01100;map00220;map04540;map01120;map01210;map00340;map00524;map01230;map04068;map05034;map01110;map00660;map04724;map05030;map00650;map00910;map02020;map…	Metabolism;Metabolism;Metabolism;Metabolism;Metabolism;Organismal Systems;Metabolism;Human Diseases;Organismal Systems;Environmental Information Processing;Cellular Processes;Metabolism;Metabolism;Organismal Systems;Metabolism;Environmental Information Processing;Metabolism;Environmental Information Processing;Human Diseases;Human Diseases;Human Diseases;Organismal Systems;Metabolism;Organismal S…	Biosynthesis of other secondary metabolites;Global and overview maps;Amino acid metabolism;Metabolism of other amino acids;Biosynthesis of other secondary metabolites;Sensory system;Amino acid metabolism;Substance dependence;Digestive system;Signal transduction;Cell growth and death;Carbohydrate metabolism;Metabolism of other amino acids;Excretory system;Metabolism of other amino acids;Membrane t…	Organic acids and derivatives	Carboxylic acids and derivatives	Amino acids, peptides, and analogues	80	-	Biosynthesis of various secondary metabolites - part 3; Carbon metabolism; Arginine and proline metabolism; Glutathione metabolism; Carbapenem biosynthesis; Taste transduction; Alanine, aspartate and glutamate metabolism; Nicotine addiction; Protein digestion and absorption; Phospholipase D signaling pathway; Ferroptosis; Glyoxylate and dicarboxylate metabolism; Taurine and hypotaurine metabolism…	Biosynthesis of various secondary metabolites - part 3; Carbon metabolism; Arginine and proline metabolism; Glutathione metabolism; Carbapenem biosynthesis; Taste transduction; Alanine, aspartate and glutamate metabolism; Nicotine addiction; Protein digestion and absorption; Phospholipase D signaling pathway; Ferroptosis; Glyoxylate and dicarboxylate metabolism; Taurine and hypotaurine metabolism…	1.1976	1.1195	0.9576	0.02316	0.1194	6.4533	6.8969	6.4672	6.2355	6.5682	6.799	6.9783	6.9694	6.7071	6.8843	6.7676	6.8586
pos_123	(4E,8E,10E-d18:3)sphingosine	metab_122	yes	up	-	pos	-	296.258	6.73177	M+H, M+Na, M+K, M+H-H2O	C18H33NO2	62.5	-	LMSP01080013	-	-	-	-	-	-	-	-	62.5	-	-	-	1.0714	1.0066	1.0287	0.003097	0.03809	7.3354	7.4293	7.4854	7.5804	7.5227	7.6564	7.2873	7.321	7.3125	7.2071	7.234	7.3979
pos_273	4-Pyridoxate	metab_272	yes	up	C00847	pos	-	166.05	2.67265	M+H-H2O, 2M+H, M+Na	C8H9NO4	82.3	-	HMDB0000017	-	-	map01100;map00750;map01120	Metabolism;Metabolism;Metabolism	Global and overview maps;Metabolism of cofactors and vitamins;Global and overview maps	Organoheterocyclic compounds	Pyridines and derivatives	Pyridinecarboxylic acids and derivatives	82.3	-	Metabolic pathways; Vitamin B6 metabolism; Microbial metabolism in diverse environments	Metabolic pathways; Vitamin B6 metabolism; Microbial metabolism in diverse environments	1.7881	1.6907	1.1145	0.00105	0.02231	5.0915	5.2759	5.4082	5.2712	5.3183	5.2375	4.8147	4.331	4.5621	4.6376	4.9147	5.0938
pos_373	5-[(E)-3-hydroxy-3-methylbut-1-enyl]-2-methylcyclohex-5-ene-1,2,4-triol	metab_372	yes	up	-	pos	-	193.122	4.46125	M+H-2H2O, M+H, M+Na	C12H20O4	66.6	-	-	-	-	-	-	-	-	-	-	66.6	-	-	-	1.0741	1.046	1.0542	0.04121	0.1609	5.6045	5.1468	5.2233	5.5605	5.4948	5.1765	5.3708	4.8713	5.16	5.1013	4.8499	5.1975
pos_490	LysoPC(22:6(4Z,7Z,10Z,13Z,16Z,19Z))	metab_489	yes	down	C04230	pos	-	568.339	6.63412	M+H, M+Na, M+H-H2O	C30H50NO7P	-	88	HMDB0010404	Lipids	Phospholipids	map00564;map05231	Metabolism;Human Diseases	Lipid metabolism;Cancer: overview	Lipids and lipid-like molecules	Glycerophospholipids	Glycerophosphocholines	-	88	Glycerophospholipid metabolism; Choline metabolism in cancer	Glycerophospholipid metabolism; Choline metabolism in cancer	1.8026	1.7461	0.9165	0.008104	0.06354	7.023	7.433	6.606	6.8331	6.7467	7.3184	7.2636	7.5797	7.3128	7.9752	8.1003	7.5481
pos_511	Farnesyl acetone	metab_510	yes	up	-	pos	-	280.263	6.8253	M+H, M+NH4, M+H-H2O	C18H30O	72.9	-	-	-	-	-	-	-	-	-	-	72.9	-	-	-	1.0081	0.9528	1.0282	0.002622	0.03535	6.6282	6.5932	6.6816	6.7385	6.6658	6.7415	6.4843	6.4979	6.5668	6.4162	6.3604	6.6242
pos_513	3-ketosphingosine	metab_512	yes	up	C06121	pos	-	298.273	6.82185	M+H, M+ACN+H, M+Na	C18H35NO2	76.4	-	LMSP01010002	-	-	-	-	-	-	-	-	76.4	-	-	-	1.2213	1.1454	1.0353	0.0001399	0.008583	6.9088	6.855	6.9614	6.9979	6.9716	7.0293	6.684	6.7376	6.7578	6.6453	6.6424	6.8346
pos_692	C-2 Ceramide	metab_688	yes	down	-	pos	-	306.279	6.91355	M+H, M+Na, M+H-2H2O	C20H39NO3	88.8	-	-	-	-	-	-	-	-	-	-	88.8	-	-	-	1.5244	1.4442	0.934	0.003193	0.03849	5.9686	6.2155	5.8751	5.993	5.8813	6.1314	6.2559	6.6074	6.4485	6.6848	6.5516	6.0691
pos_741	2,4-Nonadien-1-ol	metab_737	yes	up	-	pos	62488-56-6	298.273	6.60128	M+H-H2O, 2M+NH4, 2M+H	C9H16O	-	54.3	LMFA05000608;HMDB0034845	-	-	-	-	-	Lipids and lipid-like molecules	Fatty Acyls	Fatty alcohols	-	54.3	-	-	1.112	1.0446	1.0373	0.000731	0.01882	5.6244	5.6364	5.6925	5.8124	5.7334	5.8637	5.5229	5.4779	5.5455	5.4704	5.5226	5.5876
pos_803	P-Tolualdehyde	metab_799	yes	up	C06758	pos	104-87-0	121.065	6.40253	M+H, M+ACN+H, M+H-H2O	C8H8O	89.9	-	HMDB0029638	-	-	map01100;map01220;map00622;map01120	Metabolism;Metabolism;Metabolism;Metabolism	Global and overview maps;Global and overview maps;Xenobiotics biodegradation and metabolism;Global and overview maps	Benzenoids	Benzene and substituted derivatives	Benzoyl derivatives	89.9	-	Metabolic pathways; Degradation of aromatic compounds; Xylene degradation; Microbial metabolism in diverse environments	Metabolic pathways; Degradation of aromatic compounds; Xylene degradation; Microbial metabolism in diverse environments	1.0388	1.0354	1.0345	0.002847	0.03655	5.9631	6.0696	6.0296	5.9753	6.0765	6.0618	6.0411	5.8557	5.7915	5.7996	5.7789	5.7017
pos_1383	PC(4:0/0:0)	metab_1369	yes	down	-	pos	-	328.151	3.19155	M+H, M+Na	C12H26NO7P	51.8	-	LMGP01050061	-	-	-	-	-	-	-	-	51.8	-	-	-	2.034	1.9338	0.8582	0.01561	0.09071	4.7055	6.1703	4.7047	4.612	4.7848	5.7363	6.0343	6.0976	5.801	6.2557	6.0736	5.5254
pos_1459	1,5-dihydroxy-2,3-dimethoxy-10-methylacridin-9-one	metab_1445	yes	down	-	pos	-	334.128	3.57053	M+NH4, M+CH3OH+H	C16H15NO5	58.6	-	-	-	-	-	-	-	-	-	-	58.6	-	-	-	2.4763	2.287	0.8125	0.0005064	0.01511	4.7538	4.7261	4.347	4.1106	3.7452	3.9742	5.3509	5.4619	4.94	5.4318	5.4465	4.9468
pos_1539	Kukoamine C	metab_1525	yes	up	C17617	pos	-	531.317	3.98055	M+2H, M+H	C28H42N4O6	-	53	HMDB0060526	-	-	-	-	-	Benzenoids	Phenols	Benzenediols	-	53	-	-	1.0345	0.9778	1.0342	0.009108	0.06783	6.2019	6.0873	6.0835	6.3295	6.2893	6.2441	5.9144	6.059	6.1265	6.0512	6.0462	5.8072
pos_1727	Methyl 5-hydroxyoxindole-3-acetate	metab_1711	yes	up	-	pos	-	222.076	5.16098	M+H, M+Na	C11H11NO4	56.3	-	HMDB0038990	-	-	-	-	-	Organoheterocyclic compounds	Indoles and derivatives	Indolyl carboxylic acids and derivatives	56.3	-	-	-	2.0737	1.973	1.1346	0.0006882	0.01803	6.2723	6.1359	6.1949	6.2211	6.2076	5.8828	5.5421	5.3178	5.9072	5.106	5.0033	5.6527
pos_1864	Di-4-coumaroylputrescine	metab_1847	yes	up	-	pos	37946-59-1	381.179	6.01767	M+H, M+Na	C22H24N2O4	64.3	-	HMDB0033466	-	-	-	-	-	Phenylpropanoids and polyketides	Cinnamic acids and derivatives	Hydroxycinnamic acids and derivatives	64.3	-	-	-	1.553	1.4694	1.1164	0.03525	0.1468	5.6945	4.8703	5.9622	5.3801	5.6931	4.9061	5.3935	4.7006	4.4233	4.6081	4.9699	5.0239
pos_1882	4-[formyl-(6-methoxyquinolin-8-yl)amino]pentanoic acid	metab_1865	yes	down	-	pos	-	303.133	6.05732	M+H, M+CH3OH+H	C16H18N2O4	56.6	-	-	-	-	-	-	-	-	-	-	56.6	-	-	-	1.5835	1.4728	0.9313	0.001665	0.02777	5.7062	6.0127	5.8398	5.5622	5.7729	5.852	6.4311	6.404	6.0425	6.2856	5.9514	6.1956
pos_2043	3-(10-Heptadecenyl)phenol	metab_2025	yes	up	-	pos	111047-33-7	363.336	6.42107	M+H-H2O, M+CH3OH+H	C23H38O	-	59.9	HMDB0038525	-	-	-	-	-	Benzenoids	Phenols	1-hydroxy-4-unsubstituted benzenoids	-	59.9	-	-	1.8078	1.7196	1.0985	0.0001613	0.009234	5.9417	6.005	5.7351	6.0982	5.945	5.6613	5.2345	5.4623	5.5736	5.454	5.2574	5.2349
pos_2145	PE(18:1(9Z)/0:0)	metab_2121	yes	down	-	pos	-	480.308	6.8776	M+H, M+Na	C23H46NO7P	87.1	-	LMGP02050004	-	-	-	-	-	-	-	-	87.1	-	-	-	2.0833	1.9583	0.8988	0.0001784	0.009501	6.0576	6.4116	5.9307	6.0019	6.1431	6.6014	6.8107	6.8732	6.6714	6.9163	6.9904	7.0653
pos_2845	Linoelaidic Acid	metab_2775	yes	up	C01595	pos	506-21-8	281.247	7.29913	M+H-2H2O, M+H	C18H32O2	66.9	-	HMDB0006270;LMFA01030123;HMDB0000673	Lipids	Fatty acids	map01100;map00591;map01040;map01060	Metabolism;Metabolism;Metabolism;Metabolism	Global and overview maps;Lipid metabolism;Lipid metabolism;Chemical structure transformation maps	Lipids and lipid-like molecules	Fatty Acyls	Lineolic acids and derivatives	66.9	-	Metabolic pathways; Linoleic acid metabolism; Biosynthesis of unsaturated fatty acids; Biosynthesis of plant secondary metabolites	Metabolic pathways; Linoleic acid metabolism; Biosynthesis of unsaturated fatty acids; Biosynthesis of plant secondary metabolites	1.5078	1.4429	1.0837	0.0006299	0.01708	5.336	4.9902	5.1002	5.3071	5.1018	4.9158	4.7699	4.8124	4.7336	4.5937	4.6122	4.8526
pos_2870	(E)-1-(4-hydroxy-3-methoxyphenyl)tetradec-4-en-3-one	metab_2799	yes	down	-	pos	-	687.479	7.20178	M+ACN+Na, 2M+Na	C21H32O3	63.3	-	-	-	-	-	-	-	-	-	-	63.3	-	-	-	1.4373	1.5857	0.9145	0.02945	0.1323	5.1191	4.4778	5.0814	4.9306	4.8976	4.2447	5.2789	5.609	5.34	4.9093	5.0032	5.3014
pos_2877	3-hydroxyundecanoyl carnitine	metab_2806	yes	down	-	pos	-	363.289	7.19457	M+H-2H2O, M+NH4	C18H35NO5	-	51.8	HMDB0061637	-	-	-	-	-	Lipids and lipid-like molecules	Fatty Acyls	Fatty acid esters	-	51.8	-	-	1.7302	1.6402	0.9112	0.001984	0.03038	5.7234	5.4761	5.332	5.1664	5.376	5.8568	6.1692	5.9235	5.7813	6.2598	6.099	5.9039
pos_2897	Oleoyl Ethanolamide	metab_2823	yes	up	-	pos	-	326.305	7.13598	M+H-H2O, M+H	C20H39NO2	74.3	-	HMDB0002088	-	-	-	-	-	Organic nitrogen compounds	Organonitrogen compounds	Amines	74.3	-	-	-	1.0079	1.0044	1.0296	0.01088	0.07443	7.3666	7.1225	7.1462	7.1113	7.2274	7.0723	6.9916	6.8657	6.811	6.9386	7.1294	7.0725
pos_3093	Strepin P1	metab_3015	yes	down	-	pos	-	546.352	6.78842	M+H-H2O, M+ACN+H	C25H40N6O5	71.4	-	-	-	-	-	-	-	-	-	-	71.4	-	-	-	1.8068	1.7451	0.9214	9.921e-05	0.007255	6.1168	6.2063	6.3804	6.1207	6.5127	6.4887	6.7362	6.8777	6.7907	6.9873	6.9461	6.7158
pos_3178	LysoPC(20:4(8Z,11Z,14Z,17Z))	metab_3099	yes	down	C04230	pos	-	566.321	6.6754	M+Na, M+K	C28H50NO7P	-	87.7	HMDB0010396	Lipids	Phospholipids	map00564;map05231	Metabolism;Human Diseases	Lipid metabolism;Cancer: overview	Lipids and lipid-like molecules	Glycerophospholipids	Glycerophosphocholines	-	87.7	Glycerophospholipid metabolism; Choline metabolism in cancer	Glycerophospholipid metabolism; Choline metabolism in cancer	2.723	2.5669	0.7984	0.005397	0.05111	5.7639	6.4223	4.6571	4.7769	4.5218	6.4002	6.4179	6.9274	6.4217	6.9408	7.3386	6.7187
pos_3180	3,19-Dihydroxyurs-12-ene-23,28-dioic acid	metab_3101	yes	up	-	pos	-	503.334	6.6754	M+H, M+Na	C30H46O6	88.1	-	-	-	-	-	-	-	-	-	-	88.1	-	-	-	1.0465	0.997	1.0362	0.005037	0.0494	5.9363	6.09	6.0421	5.8637	6.1033	6.0361	5.9909	5.7946	5.8244	5.6999	5.6879	5.8136
pos_3317	PC(20:5(5Z,8Z,11Z,14Z,17Z)/0:0)	metab_3231	yes	down	-	pos	-	542.323	6.52058	M+H, M+Na	C28H48NO7P	50.9	-	LMGP01050050	-	-	-	-	-	-	-	-	50.9	-	-	-	2.055	1.9688	0.8876	0.003791	0.04271	6.2111	6.5504	5.7681	5.9286	5.8302	6.6258	6.5528	6.9336	6.553	7.2586	7.3922	6.8966
pos_3340	Harderoporphyrinogen	metab_3254	yes	up	-	pos	42607-18-1	615.314	6.45857	M+H-H2O, M+H	C35H42N4O6	-	53.6	HMDB0002160	-	-	-	-	-	Organoheterocyclic compounds	Tetrapyrroles and derivatives	Porphyrins	-	53.6	-	-	2.126	2.1055	1.2384	0.0191	0.1018	5.1275	4.9306	6.0435	5.9694	4.0765	5.7041	4.4288	5.1308	4.2514	3.8198	3.7918	4.2969
pos_3371	Behenic acid	metab_3285	yes	up	C08281	pos	112-85-6	358.367	6.45257	M+NH4, M+K	C22H44O2	-	62.4	LMFA01010022;HMDB0000944	Lipids	Fatty acids	map00073;map01040	Metabolism;Metabolism	Lipid metabolism;Lipid metabolism	Lipids and lipid-like molecules	Fatty Acyls	Fatty acids and conjugates	-	62.4	Cutin, suberine and wax biosynthesis; Biosynthesis of unsaturated fatty acids	Cutin, suberine and wax biosynthesis; Biosynthesis of unsaturated fatty acids	1.8471	1.7648	1.1065	0.001047	0.02228	6.2644	6.3274	5.6671	6.2771	6.3167	6.2507	5.596	5.3665	5.6832	5.3514	5.7155	5.8232
pos_3442	(3beta,17alpha,23S)-17,23-Epoxy-3,29-dihydroxy-27-norlanosta-7,9(11)-diene-15,24-dione	metab_3355	yes	up	-	pos	-	512.337	6.36672	M+Na, M+ACN+H	C29H42O5	-	86.5	HMDB0035970	-	-	-	-	-	Lipids and lipid-like molecules	Steroids and steroid derivatives	Oxosteroids	-	86.5	-	-	1.3013	1.2315	1.0736	0.04142	0.1613	5.9486	5.7286	5.8302	5.9936	5.8873	5.8849	5.7325	5.5048	5.6569	5.7756	4.6667	5.5208
pos_3468	Westcort	metab_3381	yes	up	C00762	pos	-	429.261	6.33473	M+H-H2O, M+H	C26H38O6	71.5	-	HMDB0002802	Steroids;Hormones and transmitters	21-Carbon atoms;Steroid hormones	map01100;map05215;map07225;map05200;map04960;map00140	Metabolism;Human Diseases;Drug Development;Human Diseases;Organismal Systems;Metabolism	Global and overview maps;Cancer: specific types;Target-based classification: Nuclear receptors;Cancer: overview;Excretory system;Lipid metabolism	Lipids and lipid-like molecules	Steroids and steroid derivatives	Hydroxysteroids	71.5	-	Metabolic pathways; Prostate cancer; Glucocorticoid and mineralocorticoid receptor agonists/antagonists; Pathways in cancer; Aldosterone-regulated sodium reabsorption; Steroid hormone biosynthesis	Metabolic pathways; Prostate cancer; Glucocorticoid and mineralocorticoid receptor agonists/antagonists; Pathways in cancer; Aldosterone-regulated sodium reabsorption; Steroid hormone biosynthesis	1.0698	1.0095	1.039	0.00879	0.06615	5.8653	5.9572	5.9374	5.8118	5.9089	6.028	5.6331	5.6508	5.6537	5.7746	5.5154	5.9513
pos_3607	Peiminine	metab_3519	yes	up	C10808	pos	-	430.33	6.12668	M+H-H2O, M+H	C27H43NO3	52.7	-	;MJDBOTE0001241	-	-	-	-	-	-	-	-	52.7	-	-	-	1.2382	1.446	1.0616	0.02776	0.1278	6.2636	6.1157	5.8357	5.7488	6.0607	6.5862	5.8216	5.8894	5.4677	5.7342	5.8096	5.767
pos_3699	DL-o-Tyrosine	metab_3609	yes	down	-	pos	-	164.07	5.81745	M+H-H2O, M+H	C9H11NO3	81.9	-	HMDB0006050	-	-	-	-	-	Organic acids and derivatives	Carboxylic acids and derivatives	Amino acids, peptides, and analogues	81.9	-	-	-	1.8605	1.7675	0.9088	6.017e-06	0.001641	5.2378	5.129	5.3449	5.2557	5.0221	5.3375	5.7986	5.7066	5.6947	5.8586	5.7734	5.638
pos_3818	D-Pantethine	metab_3727	yes	down	C12661	pos	16816-67-4	555.251	4.74078	M+H, M+Na	C22H42N4O8S2	88.8	-	HMDB0003828	-	-	-	-	-	Organic acids and derivatives	Carboxylic acids and derivatives	Amino acids, peptides, and analogues	88.8	-	-	-	2.3958	2.2671	0.7712	0.04561	0.1714	4.3412	6.1724	3.5089	2.7009	5.2306	6.1435	6.0757	6.6109	6.2237	6.4561	5.5672	5.5001
pos_3872	Riboflavin (Vitamin B2)	metab_3781	yes	up	-	pos	-	377.145	4.33967	M+H, M+Na	C17H20N4O6	66	-	-	-	-	-	-	-	-	-	-	66	-	-	-	1.2999	1.2313	1.0552	0.003913	0.04335	5.9829	6.0508	5.9355	6.023	5.9967	6.0194	5.8687	5.7009	5.8972	5.7651	5.3992	5.4884
pos_3881	Methyl (2E)-2-methoxyimino-2-[2-[(2-methylphenoxy)methyl]phenyl]acetate	metab_3790	yes	down	-	pos	-	331.165	4.20123	M+H, M+NH4	C18H19NO4	56.5	-	-	-	-	-	-	-	-	-	-	56.5	-	-	-	1.42	1.4596	0.9265	0.01906	0.1018	5.4021	5.2208	5.4898	5.3328	5.1573	5.6824	6.1331	5.4731	5.8256	5.5172	5.6513	6.2496
pos_4112	4,6-dihydroxy-3-methyl-2,3-dihydroisoindol-1-one	metab_4019	yes	up	-	pos	-	162.055	2.86117	M+H-H2O, M+H	C9H9NO3	64.4	-	-	-	-	-	-	-	-	-	-	64.4	-	-	-	2.0566	1.9434	1.1244	0.0007011	0.01823	6.3862	6.3595	6.5353	6.7642	6.7953	6.0347	5.8566	5.6154	5.8865	5.3782	5.821	6.0126
pos_4144	4-Pyridoxic acid	metab_4051	yes	up	C00847	pos	82-82-6	184.06	2.67265	M+H-2H2O, M+H	C8H9NO4	97.6	-	HMDB0000017	-	-	map01100;map00750;map01120	Metabolism;Metabolism;Metabolism	Global and overview maps;Metabolism of cofactors and vitamins;Global and overview maps	Organoheterocyclic compounds	Pyridines and derivatives	Pyridinecarboxylic acids and derivatives	97.6	-	Metabolic pathways; Vitamin B6 metabolism; Microbial metabolism in diverse environments	Metabolic pathways; Vitamin B6 metabolism; Microbial metabolism in diverse environments	1.2744	1.2114	1.0557	0.00982	0.07083	6.0746	5.8367	5.9492	6.0329	6.1213	6.1222	5.9432	5.4208	5.4931	5.8065	5.6537	5.9111
pos_4448	Uracil	metab_4351	yes	down	C00106	pos	66-22-8	113.035	1.14002	M+H-H2O, M+H	C4H4N2O2	86.9	-	HMDB0000300	Nucleic acids	Bases	map00240;map01100;map00770;map00410	Metabolism;Metabolism;Metabolism;Metabolism	Nucleotide metabolism;Global and overview maps;Metabolism of cofactors and vitamins;Metabolism of other amino acids	Organoheterocyclic compounds	Diazines	Pyrimidines and pyrimidine derivatives	86.9	-	Pyrimidine metabolism; Metabolic pathways; Pantothenate and CoA biosynthesis; beta-Alanine metabolism	Pyrimidine metabolism; Metabolic pathways; Pantothenate and CoA biosynthesis; beta-Alanine metabolism	1.3787	1.2984	0.9481	0.001923	0.03001	6.1503	6.2485	6.1008	5.8204	5.8958	6.2733	6.4034	6.4334	6.3245	6.4403	6.5087	6.3788
pos_4542	N-lactoyl-Leucine	metab_4445	yes	down	-	pos	-	242.078	1.12172	M+CH3OH+H, M+K	C9H17NO4	-	63.1	HMDB0062176	-	-	-	-	-	Organic acids and derivatives	Carboxylic acids and derivatives	Amino acids, peptides, and analogues	-	63.1	-	-	2.2964	2.1479	0.7848	0.006193	0.05509	4.1168	3.6626	4.0244	3.3447	2.7492	3.811	4.2904	4.4294	4.2818	4.2	5.1411	5.3164
pos_4545	Cis-2,3-Dimethylthiirane	metab_4448	yes	down	-	pos	5954-71-2	89.0424	1.30058	M+H, M+NH4	C4H8S	56.4	-	HMDB0039807	-	-	-	-	-	Organoheterocyclic compounds	Thiiranes	Not Available	56.4	-	-	-	2.0214	2.1051	0.766	0.04838	0.1777	3.5785	3.3456	3.2206	3.113	3.621	3.3494	4.5052	4.1224	3.1801	5.7892	5.5434	3.2657
pos_4581	Xanthine	metab_4484	yes	down	C00385	pos	69-89-6	153.041	1.43585	M+H, M+Na	C5H4N4O2	79.9	-	HMDB0000292	-	-	map01100;map01110;map00230;map01120;map00232;map01065;map01060	Metabolism;Metabolism;Metabolism;Metabolism;Metabolism;Metabolism;Metabolism	Global and overview maps;Global and overview maps;Nucleotide metabolism;Global and overview maps;Biosynthesis of other secondary metabolites;Chemical structure transformation maps;Chemical structure transformation maps	Organoheterocyclic compounds	Imidazopyrimidines	Purines and purine derivatives	79.9	-	Metabolic pathways; Biosynthesis of secondary metabolites; Purine metabolism; Microbial metabolism in diverse environments; Caffeine metabolism; Biosynthesis of alkaloids derived from histidine and purine; Biosynthesis of plant secondary metabolites	Metabolic pathways; Biosynthesis of secondary metabolites; Purine metabolism; Microbial metabolism in diverse environments; Caffeine metabolism; Biosynthesis of alkaloids derived from histidine and purine; Biosynthesis of plant secondary metabolites	1.4725	1.399	0.9378	0.008491	0.06483	6.3425	6.5959	6.3815	6.0216	5.9749	6.7474	6.726	6.788	6.6646	6.777	6.8973	6.7365
pos_5053	Alanyl-Proline	metab_4920	yes	down	-	pos	-	187.108	0.807267	M+H	C8H14N2O3	53.9	-	HMDB0028695	-	-	-	-	-	Organic acids and derivatives	Carboxylic acids and derivatives	Amino acids, peptides, and analogues	53.9	-	-	-	1.5288	1.4568	0.9354	0.0007125	0.0185	5.6774	5.861	5.7559	5.7548	5.7497	6.0171	6.1314	6.1792	5.9927	6.368	6.4307	6.1192
pos_5257	5-Hydroxymethylcytidine	metab_5114	yes	down	-	pos	-	256.092	1.12903	M+H-H2O	C10H15N3O6	63.5	-	-	-	-	-	-	-	-	-	-	63.5	-	-	-	1.2097	1.1566	0.9432	0.01161	0.07667	4.9728	4.7786	4.9924	4.929	4.8494	5.052	5.3242	5.2649	4.8788	5.5267	5.2185	5.1439
pos_5363	MJAW00197	metab_5208	yes	up	-	pos	-	225.123	1.26248	M+NH4	C11H13NO3	60.3	-	;MJAW00197	-	-	-	-	-	-	-	-	60.3	-	-	-	1.0847	1.0317	1.0492	0.03309	0.1412	5.5197	5.6114	5.5581	5.5023	6.0148	5.3476	5.4132	5.3402	5.5373	5.2703	5.178	5.2425
pos_5614	Phenylacetaldehyde	metab_5455	yes	down	C00601	pos	122-78-1	121.065	2.02118	M+H	C8H8O	86.1	-	HMDB0006236;HMDB0041610	-	-	map01100;map00360;map01120;map00643	Metabolism;Metabolism;Metabolism;Metabolism	Global and overview maps;Amino acid metabolism;Global and overview maps;Xenobiotics biodegradation and metabolism	Benzenoids	Benzene and substituted derivatives	Phenylacetaldehydes	86.1	-	Metabolic pathways; Phenylalanine metabolism; Microbial metabolism in diverse environments; Styrene degradation	Metabolic pathways; Phenylalanine metabolism; Microbial metabolism in diverse environments; Styrene degradation	1.8008	1.7498	0.884	0.01073	0.07368	5.1618	4.9515	5.0614	5.2181	5.3031	5.2628	5.7302	5.5806	5.3747	6.2605	6.6578	5.4184
pos_5976	4-Methyl-5-thiazoleethanol	metab_5786	yes	up	C04294	pos	137-00-8	144.048	2.84385	M+H	C6H9NOS	82.8	-	HMDB0032985	-	-	map00730;map01100	Metabolism;Metabolism	Metabolism of cofactors and vitamins;Global and overview maps	Organoheterocyclic compounds	Azoles	Thiazoles	82.8	-	Thiamine metabolism; Metabolic pathways	Thiamine metabolism; Metabolic pathways	1.1429	1.1947	1.0501	0.01765	0.0974	5.6513	6.1222	5.8426	5.7517	6.0217	5.98	5.4622	5.7529	5.3976	5.5537	5.7466	5.7734
pos_6099	2-Deoxyribose	metab_5905	yes	up	C01801	pos	533-67-5	176.092	3.07345	M+ACN+H	C5H10O4	69.4	-	HMDB0003224	Carbohydrates	Monosaccharides	map01100;map00030	Metabolism;Metabolism	Global and overview maps;Carbohydrate metabolism	Organic oxygen compounds	Organooxygen compounds	Carbohydrates and carbohydrate conjugates	69.4	-	Metabolic pathways; Pentose phosphate pathway	Metabolic pathways; Pentose phosphate pathway	1.8892	1.7971	1.1746	0.007202	0.05959	4.2594	4.6053	4.4096	4.5247	5.2227	4.3018	4.03	3.5607	4.162	3.6486	3.5242	4.3371
pos_6854	2-[(2-hydroxy-3-methylbutanoyl)amino]-4-methylpentanoic acid	metab_6643	yes	up	-	pos	-	480.331	4.32373	2M+NH4	C11H21NO4	69.4	-	-	-	-	-	-	-	-	-	-	69.4	-	-	-	5.5498	5.3653	3.5101	5.548e-12	2.688e-08	5.8828	5.8945	6.1372	6.3752	6.1966	6.1367	1.675	1.6641	1.6307	1.6432	2.1944	1.6293
pos_6890	(2S,3R)-2-aminooctadecane-1,3-diol	metab_6677	yes	up	C00836	pos	764-22-7	340.259	4.40478	M+K	C18H39NO2	72.2	-	HMDB0000269	-	-	map00600;map01100;map04071	Metabolism;Metabolism;Environmental Information Processing	Lipid metabolism;Global and overview maps;Signal transduction	Organic nitrogen compounds	Organonitrogen compounds	Amines	72.2	-	Sphingolipid metabolism; Metabolic pathways; Sphingolipid signaling pathway	Sphingolipid metabolism; Metabolic pathways; Sphingolipid signaling pathway	1.2628	1.3347	1.0707	0.02521	0.1209	5.2338	4.9177	4.9944	5.3059	5.3607	5.3591	4.7965	4.7753	4.6062	4.88	5.3391	4.7148
pos_6977	N6-(Delta2-Isopentenyl)-Adenine	metab_6763	yes	down	C04083	pos	-	204.124	4.58758	M+H	C10H13N5	65.2	-	-	-	-	map01110;map04075;map00908	Metabolism;Environmental Information Processing;Metabolism	Global and overview maps;Signal transduction;Metabolism of terpenoids and polyketides	-	-	-	65.2	-	Biosynthesis of secondary metabolites; Plant hormone signal transduction; Zeatin biosynthesis	Biosynthesis of secondary metabolites; Plant hormone signal transduction; Zeatin biosynthesis	1.5778	1.4655	0.9166	0.00441	0.0462	4.7273	5.2316	4.9523	4.9108	4.5569	5.0863	5.5496	5.4474	5.203	5.3997	5.4585	5.0879
pos_7079	2-Ethyl-5-imino-1-cyclopenten-1-ol	metab_6863	yes	up	-	pos	90554-84-0	126.091	4.79855	M+H	C7H11NO	53.6	-	HMDB0039583	-	-	-	-	-	Organic nitrogen compounds	Organonitrogen compounds	Imines	53.6	-	-	-	1.6944	1.6548	1.1329	0.0115	0.07632	5.0662	4.8918	4.8551	5.4432	5.0498	4.412	4.3181	4.2467	4.9807	4.1777	4.1112	4.3956
pos_7541	Myristoylglycine	metab_7321	yes	down	-	pos	-	286.237	5.78012	M+H	C16H31NO3	-	73.9	HMDB0013250	-	-	-	-	-	Organic acids and derivatives	Carboxylic acids and derivatives	Amino acids, peptides, and analogues	-	73.9	-	-	1.055	0.9947	0.9655	0.002202	0.03211	5.495	5.2711	5.3276	5.3155	5.3994	5.4158	5.6721	5.6491	5.5011	5.4677	5.5413	5.5441
pos_7559	(E)-N-(4-acetamidobutyl)-3-(4-hydroxy-3-methoxyphenyl)prop-2-enamide	metab_7339	yes	down	-	pos	-	339.191	5.81745	M+CH3OH+H	C16H22N2O4	68.1	-	-	-	-	-	-	-	-	-	-	68.1	-	-	-	1.3726	1.3217	0.947	0.0002686	0.01178	5.5995	5.3675	5.7107	5.5943	5.5182	5.5507	5.9434	5.8854	5.7961	5.9757	5.8332	5.7756
pos_7668	LysoPE(0:0/22:0)	metab_7445	yes	up	-	pos	-	502.363	5.96777	M+H-2H2O	C27H56NO7P	-	72.1	HMDB0011490	-	-	-	-	-	Lipids and lipid-like molecules	Glycerophospholipids	Glycerophosphoethanolamines	-	72.1	-	-	2.2695	2.2651	1.2978	0.04292	0.165	4.5523	5.7562	6.0591	5.2574	5.3275	4.3999	3.2224	3.9108	5.8102	3.1899	3.1846	4.8382
pos_7787	3-Hexaprenyl-4,5-Dihydroxybenzoic acid	metab_7560	yes	up	C05200	pos	63975-40-6	626.422	6.07837	M+ACN+Na	C37H54O4	-	51.1	HMDB0001063;LMPR02010043	-	-	map00130;map01110	Metabolism;Metabolism	Metabolism of cofactors and vitamins;Global and overview maps	Lipids and lipid-like molecules	Prenol lipids	Polyprenylphenols	-	51.1	Ubiquinone and other terpenoid-quinone biosynthesis; Biosynthesis of secondary metabolites	Ubiquinone and other terpenoid-quinone biosynthesis; Biosynthesis of secondary metabolites	1.2388	1.1846	1.0752	0.04161	0.1617	5.3814	5.1439	5.191	5.7981	5.0381	4.9432	4.8288	4.5449	5.1691	4.7091	5.0427	4.9999
pos_7925	MJAW00140	metab_7685	yes	up	-	pos	-	504.331	6.1896	M+H-H2O	C29H47NO7	85.4	-	;MJAW00140	-	-	-	-	-	-	-	-	85.4	-	-	-	3.0826	3.0269	1.2993	2.215e-07	0.000161	5.9242	5.7301	6.1054	5.9538	6.0346	6.3237	4.785	4.8262	4.3964	4.761	4.5659	4.4259
pos_7973	Lauric isopropanolamide	metab_7731	yes	up	-	pos	-	290.268	6.23018	M+CH3OH+H	C15H31NO2	63.5	-	-	-	-	-	-	-	-	-	-	63.5	-	-	-	1.2178	1.1723	1.0565	0.01298	0.08121	5.6988	5.5529	5.7764	5.4979	5.774	5.6033	5.569	5.2546	5.535	5.1638	5.0648	5.5061
pos_8385	Phosphocholine	metab_8099	yes	down	C00588	pos	-	184.073	6.64	M+H	C5H14NO4P	83.4	-	HMDB0001565	-	-	map01100;map00564;map05231	Metabolism;Metabolism;Human Diseases	Global and overview maps;Lipid metabolism;Cancer: overview	Organic nitrogen compounds	Organonitrogen compounds	Quaternary ammonium salts	83.4	-	Metabolic pathways; Glycerophospholipid metabolism; Choline metabolism in cancer	Metabolic pathways; Glycerophospholipid metabolism; Choline metabolism in cancer	1.7203	1.6882	0.8936	0.009514	0.06929	5.0967	5.0399	4.96	4.9696	5.1362	5.1956	5.3604	5.6812	5.1685	6.0424	6.353	5.4085
pos_8418	Tobramycin, N-propionyl derivative likely	metab_8129	yes	down	-	pos	-	488.274	6.67883	M+H-2H2O	C21H41N5O10	50.3	-	-	-	-	-	-	-	-	-	-	50.3	-	-	-	1.9266	1.8004	0.8684	0.01069	0.07364	4.5817	5.513	4.5397	4.3731	4.4487	5.4748	5.5495	5.388	5.2569	5.5289	5.697	5.8992
pos_8565	HU-308	metab_8262	yes	down	-	pos	-	415.319	6.8568	M+H	C27H42O3	84.6	-	-	-	-	-	-	-	-	-	-	84.6	-	-	-	1.1235	1.1162	0.9569	0.004724	0.04812	5.4494	5.1311	5.3167	5.3443	5.1365	5.1787	5.436	5.5561	5.6471	5.4818	5.4709	5.3832
pos_8607	Phosphatidylethanolamine (20:1/16:1) Abbr	metab_8301	yes	up	-	pos	-	766.53	6.8967	M+Na	C41H78NO8P	75.2	-	-	-	-	-	-	-	-	-	-	75.2	-	-	-	1.7396	1.6907	1.122	0.001899	0.02978	5.5531	5.0163	4.875	5.2188	5.0591	4.782	4.3699	4.6946	4.6377	4.3374	4.7186	4.4305
pos_8851	Pubesenolide	metab_8520	yes	down	-	pos	98569-64-3	481.292	7.15362	M+Na	C28H42O5	-	72.1	HMDB0033728	-	-	-	-	-	Lipids and lipid-like molecules	Prenol lipids	Triterpenoids	-	72.1	-	-	3.1087	2.9295	0.7058	0.0009402	0.02093	4.3721	4.1622	3.6468	3.236	3.2788	4.5892	5.5708	5.916	4.3629	5.9301	6.016	5.1982
pos_8894	(3-hexadecanoyloxy-2-hydroxypropyl) 2-(trimethylazaniumyl)ethyl phosphate	metab_8558	yes	down	-	pos	-	518.321	7.19003	M+Na	C24H50NO7P	75.8	-	-	-	-	-	-	-	-	-	-	75.8	-	-	-	1.0145	1.0073	0.963	0.01733	0.09646	5.5495	5.5453	5.2251	5.5654	5.3969	5.4871	5.7953	5.479	5.7577	5.5637	5.6885	5.7465
pos_9047	(9Z,12Z,15Z)-octadeca-9,12,15-trienoic acid	metab_8690	yes	up	C06427	pos	463-40-1	296.258	7.37882	M+NH4	C18H30O2	76.8	-	HMDB0001388;MJDBWX000002419	Lipids	Fatty acids	map01100;map01110;map00592;map01040;map01070;map01060	Metabolism;Metabolism;Metabolism;Metabolism;Metabolism;Metabolism	Global and overview maps;Global and overview maps;Lipid metabolism;Lipid metabolism;Chemical structure transformation maps;Chemical structure transformation maps	Lipids and lipid-like molecules	Fatty Acyls	Lineolic acids and derivatives	76.8	-	Metabolic pathways; Biosynthesis of secondary metabolites; alpha-Linolenic acid metabolism; Biosynthesis of unsaturated fatty acids; Biosynthesis of plant hormones; Biosynthesis of plant secondary metabolites	Metabolic pathways; Biosynthesis of secondary metabolites; alpha-Linolenic acid metabolism; Biosynthesis of unsaturated fatty acids; Biosynthesis of plant hormones; Biosynthesis of plant secondary metabolites	1.7823	1.6557	1.1935	0.02255	0.1131	3.9223	3.5963	5.0524	4.1245	3.7112	3.982	2.9425	3.4028	3.6879	3.277	3.7687	3.3553
pos_9661	Acetohydroxamic acid	metab_9229	yes	down	C06808	pos	546-88-3	76.0398	8.45955	M+H	C2H5NO2	66.3	-	HMDB0014691	-	-	-	-	-	Organic acids and derivatives	Carboxylic acids and derivatives	Carboxylic acid derivatives	66.3	-	-	-	1.1066	1.0711	0.9354	0.02114	0.1087	3.6732	3.816	3.6151	3.714	3.636	3.774	4.1042	3.9286	3.5657	4.17	4.0615	3.9337
pos_11111	Mmv676053	metab_10495	yes	up	-	pos	-	322.077	7.71663	M+H-2H2O	C18H16ClN3O3	53.6	-	-	-	-	-	-	-	-	-	-	53.6	-	-	-	1.0008	0.9523	1.0564	0.03551	0.1475	4.5982	4.2229	4.3157	4.5824	4.5488	4.3624	4.1677	4.191	4.0138	4.1411	4.1456	4.5453
pos_11820	N,N-Diethyl-3,4-dimethoxybenzamide	metab_11115	yes	down	-	pos	-	516.305	7.19003	2M+ACN+H	C13H19NO3	62.5	-	-	-	-	-	-	-	-	-	-	62.5	-	-	-	1.6527	1.5121	0.8971	0.02361	0.1164	5.0319	5.4053	4.8817	4.472	4.4827	5.3991	5.7827	5.4007	5.2516	5.1324	5.5606	5.9455
pos_11881	5-Aminoimidazole	metab_11167	yes	down	C05239	pos	4919-03-03	125.082	7.16215	M+ACN+H	C3H5N3	-	62.2	HMDB0003929	-	-	map01100;map00230	Metabolism;Metabolism	Global and overview maps;Nucleotide metabolism	Organoheterocyclic compounds	Azoles	Imidazoles	-	62.2	Metabolic pathways; Purine metabolism	Metabolic pathways; Purine metabolism	1.2125	1.1685	0.9098	0.04898	0.1786	3.5192	3.9489	3.8731	3.804	3.9258	3.6274	4.5066	3.7006	3.869	4.678	4.1116	4.085
pos_12039	Methyl palmitoleate	metab_11307	yes	down	-	pos	-	310.273	7.08265	M+ACN+H	C17H32O2	76.5	-	-	-	-	-	-	-	-	-	-	76.5	-	-	-	2.1974	2.0971	0.8192	0.005726	0.05248	4.3563	4.0994	4.1254	3.7665	3.3439	4.8911	5.186	5.1092	4.3906	5.4033	5.1021	4.8144
pos_12272	Iso-Roridine	metab_11514	yes	down	-	pos	-	537.249	6.951	M+Na	C29H38O8	68	-	-	-	-	-	-	-	-	-	-	68	-	-	-	1.7523	1.7263	0.8578	0.02566	0.1223	4.5683	4.6277	4.4211	3.58	4.3805	4.7718	4.8232	4.3767	4.8084	5.7074	5.6694	5.3357
pos_12278	Methyl linolenate	metab_11520	yes	down	-	pos	-	293.247	6.951	M+H	C19H32O2	66.2	-	-	-	-	-	-	-	-	-	-	66.2	-	-	-	1.2456	1.1667	0.9518	0.001982	0.03038	5.5592	5.2378	5.4589	5.4072	5.3203	5.5074	5.8324	5.692	5.5436	5.7608	5.7185	5.5844
pos_12419	Carmaphycin B enone analogue	metab_11652	yes	down	-	pos	-	516.305	6.87278	M+H	C25H45N3O6S	73.2	-	-	-	-	-	-	-	-	-	-	73.2	-	-	-	2.9111	2.7391	0.727	0.001794	0.02905	3.4542	3.7848	3.9151	4.1403	3.7427	4.762	5.5686	5.4427	4.0539	5.7878	6.245	5.6468
pos_12483	2-benzyl-1-methyl-5-nonylpyrrolidin-3-ol	metab_11713	yes	up	-	pos	-	381.289	6.84463	M+ACN+Na	C21H35NO	73.8	-	-	-	-	-	-	-	-	-	-	73.8	-	-	-	1.0793	1.0212	1.0352	0.0004448	0.0145	5.7739	5.7642	5.7102	5.7795	5.7505	5.7681	5.5989	5.5741	5.6797	5.5244	5.4097	5.5852
pos_12816	Mmv634140	metab_12014	yes	up	-	pos	-	473.24	6.6754	M+ACN+H	C22H30ClN5O2	86.3	-	-	-	-	-	-	-	-	-	-	86.3	-	-	-	1.7247	1.6457	1.1332	0.02098	0.1083	5.0748	5.6796	5.5175	5.13	5.7885	5.6791	5.1823	4.868	5.2082	4.5064	4.0103	5.2269
pos_12912	Acetylspiramycin (ASPM)	metab_12097	yes	down	-	pos	-	917.561	6.62087	M+CH3OH+H	C45H76N2O15	57.1	-	;MJDBOTE0001659	-	-	-	-	-	-	-	-	57.1	-	-	-	1.7358	1.6573	0.8895	0.01779	0.09771	5.2847	5.1637	4.5685	5.2579	5.6534	5.7935	5.5868	5.7888	5.4948	6.1931	6.407	6.1944
pos_12975	Octacosanal	metab_12153	yes	down	-	pos	22725-64-0	426.466	6.58375	M+NH4	C28H56O	-	54.3	LMFA06000108;HMDB0029690	-	-	-	-	-	Lipids and lipid-like molecules	Fatty Acyls	Fatty aldehydes	-	54.3	-	-	2.3962	2.2627	0.8058	0.003007	0.03776	4.5294	4.6493	4.1326	3.6312	3.6318	5.2262	5.4159	5.3052	5.0314	5.5481	5.4679	5.2446
pos_13210	Putative (3-hydroxyoctadecanoyl)glycine	metab_12371	yes	down	-	pos	-	390.32	6.4705	M+CH3OH+H	C20H39NO4	81.6	-	-	-	-	-	-	-	-	-	-	81.6	-	-	-	1.3315	1.2684	0.9494	0.0007491	0.01898	5.6526	5.7607	5.708	5.752	5.748	5.9541	5.986	6.0673	5.9138	6.2523	6.1529	6.047
pos_13777	6-hydroxysphingosine	metab_12891	yes	down	-	pos	-	316.284	6.2539	M+H	C18H37NO3	77.3	-	LMSP01080003	-	-	-	-	-	-	-	-	77.3	-	-	-	1.4435	1.3578	0.9345	0.004853	0.04872	5.3063	5.5957	5.4614	5.5328	5.6421	5.9531	5.877	6.2329	5.7973	5.9933	6.0492	5.8911
pos_13869	11Beta,17Alpha,21-Trihydroxy-4-Pregnene-3,20-Dione 21-Caprylate	metab_12973	yes	up	-	pos	-	530.347	6.2069	M+ACN+H	C29H44O6	56.1	-	-	-	-	-	-	-	-	-	-	56.1	-	-	-	1.8846	1.7879	1.1423	0.004933	0.04904	5.3426	5.4963	5.3023	5.7827	5.4683	5.4041	4.9426	4.9822	5.0028	5.0097	3.9109	4.8639
pos_13942	Soladulcidine	metab_13036	yes	up	C10826	pos	-	416.351	6.1846	M+H	C27H45NO2	66.1	-	LMST01150002;HMDB0034731	-	-	map01066	Metabolism	Chemical structure transformation maps	Lipids and lipid-like molecules	Steroids and steroid derivatives	Steroidal alkaloids	66.1	-	Biosynthesis of alkaloids derived from terpenoid and polyketide	Biosynthesis of alkaloids derived from terpenoid and polyketide	2.0021	2.1515	1.1806	0.00299	0.03765	5.1328	4.8225	4.6426	4.4539	4.6855	5.474	4.1809	4.2609	3.5819	4.2306	4.0972	4.3941
pos_14242	Deferrioxamine	metab_13312	yes	down	C06940	pos	-	623.343	6.07462	M+Na	C27H48N6O9	80.2	-	HMDB0014884	-	-	-	-	-	Organic acids and derivatives	Carboxylic acids and derivatives	Carboxylic acid derivatives	80.2	-	-	-	1.7576	1.7016	0.9308	1.135e-05	0.002413	6.3931	6.2363	6.525	6.367	6.1908	6.3874	6.8989	6.8132	6.873	6.8904	6.7244	6.7311
pos_14338	3-Hydroxy-2-phenyl-2,3,3a,7a-tetrahydro-5H-furo[3,2-b]pyran-5-one	metab_13404	yes	up	-	pos	-	255.065	6.02797	M+Na	C13H12O4	55.8	-	-	-	-	-	-	-	-	-	-	55.8	-	-	-	1.0887	1.0338	1.0633	0.03134	0.137	4.747	4.428	4.7138	4.4838	4.6038	4.6384	4.5678	4.1758	4.3492	3.9297	4.5033	4.4397
pos_14373	Methyl Deoxycholate	metab_13437	yes	up	-	pos	-	448.341	6.00192	M+ACN+H	C25H42O4	63.3	-	-	-	-	-	-	-	-	-	-	63.3	-	-	-	4.3291	4.1926	1.648	6.638e-09	9.152e-06	6.9211	6.7722	6.556	6.5316	6.7113	7.2671	4.0463	3.9857	4.3473	4.4996	3.8656	3.9851
pos_14384	4-Methylumbelliferone	metab_13448	yes	down	C03081	pos	-	194.081	5.9982	M+NH4	C10H8O3	75.2	-	HMDB0059622	-	-	-	-	-	Phenylpropanoids and polyketides	Coumarins and derivatives	Hydroxycoumarins	75.2	-	-	-	1.3321	1.3128	0.9435	0.0006803	0.0179	5.1459	4.8862	5.006	5.1998	4.8971	4.9426	5.3383	5.244	5.3658	5.427	5.2439	5.2618
pos_14392	Trp derivative	metab_13455	yes	down	-	pos	-	224.091	5.99102	M+H	C11H13NO4	60.1	-	-	-	-	-	-	-	-	-	-	60.1	-	-	-	2.6012	2.4691	0.8306	3.211e-06	0.00107	5.0786	4.8487	5.0402	4.9895	4.526	5.2039	6.0677	5.8637	5.8752	6.1558	5.8866	5.8945
pos_14436	Lunarine	metab_13497	yes	down	C10603	pos	-	470.264	5.96108	M+CH3OH+H	C25H31N3O4	62.8	-	-	-	-	-	-	-	-	-	-	62.8	-	-	-	1.7873	1.6972	0.9043	0.001279	0.02477	5.0608	5.2233	5.4932	5.137	5.3549	5.7691	5.9581	5.9641	5.5709	6.0511	6.0019	5.8858
pos_14491	Erinacine D	metab_13552	yes	up	-	pos	157397-40-5	520.326	5.91198	M+ACN+H	C27H42O7	-	55.7	HMDB0031896	-	-	-	-	-	Lipids and lipid-like molecules	Prenol lipids	Diterpenoids	-	55.7	-	-	5.5603	5.5261	4.2122	9.544e-06	0.002202	6.1134	6.1088	6.345	6.4883	6.2858	6.0624	1.8409	3.5029	0.2872	2.6838	0.28	0.2865
pos_14761	DG(14:0/0:0/16:1n7)	metab_13817	yes	up	-	pos	-	270.237	5.62498	M+2H	C33H62O5	-	60.3	HMDB0055960	-	-	-	-	-	Lipids and lipid-like molecules	Glycerolipids	Diradylglycerols	-	60.3	-	-	2.3005	2.1561	1.3223	0.04899	0.1786	4.1745	5.1602	5.4775	5.855	5.6648	4.9338	3.7335	5.0406	5.6062	4.1187	2.5672	2.5808
pos_15068	MJAW00178	metab_14119	yes	up	-	pos	-	443.228	5.20182	2M+K	C9H18N2O3	58.4	-	;MJAW00178	-	-	-	-	-	-	-	-	58.4	-	-	-	1.8478	1.7618	1.1124	0.001347	0.02544	5.8364	5.8177	5.6971	5.6109	6.1054	6.0254	5.3868	5.473	5.5872	5.1357	5.0954	4.8671
pos_15251	N1,N10-Dicoumaroylspermidine	metab_14299	yes	up	-	pos	65715-79-9	438.238	4.95473	M+H	C25H31N3O4	63.5	-	HMDB0033469	-	-	-	-	-	Phenylpropanoids and polyketides	Cinnamic acids and derivatives	Hydroxycinnamic acids and derivatives	63.5	-	-	-	1.2751	1.208	1.0538	0.01091	0.07444	6.492	6.0944	6.6024	6.3502	6.3054	6.3404	6.2213	5.968	6.1675	5.9441	5.7405	6.192
pos_15629	Dihydroalbocycline	metab_14669	yes	down	C15753	pos	-	349.175	4.49415	M+K	C18H30O4	77.3	-	-	-	-	-	-	-	-	-	-	77.3	-	-	-	1.2868	1.1784	0.9278	0.04973	0.1803	5.2385	4.9336	4.8041	4.7672	4.7321	4.7425	5.1545	5.8725	5.4469	5.0851	5.1307	4.8033
pos_15749	N-(3S-hydroxydecanoyl)-L-serine	metab_14788	yes	up	-	pos	-	276.18	4.34948	M+H	C13H25NO5	61.4	-	LMFA00000002	-	-	-	-	-	-	-	-	61.4	-	-	-	3.8013	3.6555	1.7323	3.558e-07	0.0002069	5.1533	4.889	4.4512	5.3791	5.4449	4.8539	3.0958	2.6853	2.5753	2.9329	2.9179	3.2091
pos_16047	N~5~-Carbamoyl-N~2~-(phenylacetyl)ornithine	metab_15082	yes	down	-	pos	-	326.17	4.01967	M+CH3OH+H	C14H19N3O4	51.6	-	-	-	-	-	-	-	-	-	-	51.6	-	-	-	1.4843	1.4033	0.9227	0.003853	0.04297	5.0424	4.8017	4.9872	4.8262	4.7529	5.0216	5.4769	5.2118	4.9919	5.6834	5.2474	5.284
pos_16401	Dropropizine	metab_15431	yes	up	-	pos	-	254.186	3.6374	M+NH4	C13H20N2O2	51.7	-	-	-	-	-	-	-	-	-	-	51.7	-	-	-	4.0679	3.8818	1.8849	2.952e-07	0.0001884	5.4326	5.0576	5.0328	5.1231	5.1335	5.2641	2.9562	2.8915	3.1108	2.8445	1.7996	2.8691
pos_16423	Amisulpride N-Oxide	metab_15453	yes	up	-	pos	-	430.138	3.61108	M+2Na-H	C17H27N3O5S	52.6	-	-	-	-	-	-	-	-	-	-	52.6	-	-	-	2.2167	2.3463	1.2991	0.0462	0.1728	5.4353	4.5024	4.9944	5.2329	5.619	4.6808	4.5834	2.8723	5.2997	2.851	2.823	5.0177
pos_16547	5'-Deoxy-5'-(methylthio)adenosine	metab_15576	yes	down	C00170	pos	-	298.096	3.49515	M+H	C11H15N5O3S	90	-	HMDB0001173	-	-	map01100;map00270;map01060;map00908	Metabolism;Metabolism;Metabolism;Metabolism	Global and overview maps;Amino acid metabolism;Chemical structure transformation maps;Metabolism of terpenoids and polyketides	Nucleosides, nucleotides, and analogues	5'-deoxyribonucleosides	5'-deoxy-5'-thionucleosides	90	-	Metabolic pathways; Cysteine and methionine metabolism; Biosynthesis of plant secondary metabolites; Zeatin biosynthesis	Metabolic pathways; Cysteine and methionine metabolism; Biosynthesis of plant secondary metabolites; Zeatin biosynthesis	1.5725	1.7198	0.9022	0.03211	0.1385	5.3369	4.851	4.5034	5.1676	5.8388	4.9573	5.8246	5.8151	5.8556	5.0711	5.6707	5.7413
pos_16703	Isoleucyl-Arginine	metab_15729	yes	down	-	pos	-	270.192	3.34552	M+H-H2O	C12H25N5O3	-	59.8	HMDB0028901	-	-	-	-	-	Organic acids and derivatives	Carboxylic acids and derivatives	Amino acids, peptides, and analogues	-	59.8	-	-	1.5978	1.4904	0.9029	0.01259	0.08031	4.6167	4.6837	4.5674	4.6499	4.5299	5.0105	5.0785	5.8231	4.8873	5.3976	5.0073	4.8823
pos_16924	Succinoadenosine	metab_15947	yes	up	-	pos	-	384.114	3.12753	M+H	C14H17N5O8	55.9	-	HMDB0000912	-	-	-	-	-	Nucleosides, nucleotides, and analogues	Purine nucleosides	Not Available	55.9	-	-	-	1.6457	1.5049	1.128	0.04207	0.1629	5.209	5.3449	5.2845	5.2894	5.7323	5.2922	5.1388	3.6965	4.722	5.0831	4.4698	5.3942
pos_17452	(5E)-2-heptyl-3,4,7-trihydroxy-2,3,4,7,8,9-hexahydrooxecin-10-one	metab_16443	yes	up	-	pos	-	323.182	2.63683	M+Na	C16H28O5	54.7	-	-	-	-	-	-	-	-	-	-	54.7	-	-	-	2.4658	2.2893	1.2076	0.002516	0.0348	6.5222	5.0229	5.8757	6.1626	6.6204	6.4767	5.2263	4.8479	5.288	5.3014	4.8733	4.8326
pos_17647	Thymine	metab_16608	yes	down	C00178	pos	65-71-4	127.05	2.3704	M+H	C5H6N2O2	95.6	-	HMDB0000262	Nucleic acids	Bases	map00240;map01100	Metabolism;Metabolism	Nucleotide metabolism;Global and overview maps	Organoheterocyclic compounds	Diazines	Pyrimidines and pyrimidine derivatives	95.6	-	Pyrimidine metabolism; Metabolic pathways	Pyrimidine metabolism; Metabolic pathways	1.3686	1.2861	0.9353	0.01483	0.08804	5.6996	5.6942	5.6019	5.2388	5.3472	6.0488	5.8854	5.9732	5.8952	5.9601	5.9605	6.2861
pos_17946	N-Acetyl-L-glutamate	metab_16902	yes	down	C00624	pos	1188-37-0	212.053	1.48637	M+Na	C7H11NO5	56.2	-	HMDB0001138	-	-	map01100;map01210;map00220;map01110;map01230	Metabolism;Metabolism;Metabolism;Metabolism;Metabolism	Global and overview maps;Global and overview maps;Amino acid metabolism;Global and overview maps;Global and overview maps	Organic acids and derivatives	Carboxylic acids and derivatives	Amino acids, peptides, and analogues	56.2	-	Metabolic pathways; 2-Oxocarboxylic acid metabolism; Arginine biosynthesis; Biosynthesis of secondary metabolites; Biosynthesis of amino acids	Metabolic pathways; 2-Oxocarboxylic acid metabolism; Arginine biosynthesis; Biosynthesis of secondary metabolites; Biosynthesis of amino acids	1.333	1.2517	0.9315	0.02244	0.1127	5.2464	5.56	5.041	4.7038	5.3618	5.5917	5.6804	5.69	5.5738	5.6702	5.4709	5.735
pos_18185	Uric acid	metab_17131	yes	up	C00366	pos	69-93-2	169.035	1.20792	M+H	C5H4N4O3	64.4	-	HMDB0000289	-	-	map01100;map04976;map00230;map01120	Metabolism;Organismal Systems;Metabolism;Metabolism	Global and overview maps;Digestive system;Nucleotide metabolism;Global and overview maps	Organoheterocyclic compounds	Imidazopyrimidines	Purines and purine derivatives	64.4	-	Metabolic pathways; Bile secretion; Purine metabolism; Microbial metabolism in diverse environments	Metabolic pathways; Bile secretion; Purine metabolism; Microbial metabolism in diverse environments	1.5082	1.4172	1.1079	0.0116	0.07663	4.6495	5.0074	4.7095	4.3241	4.9742	4.6792	4.0549	4.3857	4.4939	4.0016	4.0333	4.6157
pos_18358	2,6-Piperidinedicarboxylic acid	metab_17292	yes	up	-	pos	-	174.076	1.09952	M+H	C7H11NO4	65.3	-	-	-	-	-	-	-	-	-	-	65.3	-	-	-	1.2859	1.2181	1.059	0.01073	0.07368	5.9772	5.9944	5.9184	6.1083	6.0325	5.605	5.6609	5.5385	5.8046	5.7699	5.2775	5.5993
pos_18842	Thiamine monophosphate	metab_17736	yes	down	C01081	pos	495-23-8	345.077	0.718467	M+H	C12H17N4O4PS	62.2	-	HMDB0002666	-	-	map00730;map01100	Metabolism;Metabolism	Metabolism of cofactors and vitamins;Global and overview maps	Organoheterocyclic compounds	Diazines	Pyrimidines and pyrimidine derivatives	62.2	-	Thiamine metabolism; Metabolic pathways	Thiamine metabolism; Metabolic pathways	3.2218	3.0145	0.6272	0.003285	0.0394	2.4338	4.3167	2.3976	2.4377	2.4349	4.9076	5.1561	5.2609	4.518	5.486	4.7528	5.0035
pos_18846	Muramate	metab_17740	yes	down	C06470	pos	-	293.134	0.718467	M+ACN+H	C9H17NO7	69.1	-	HMDB0003254	Carbohydrates	Monosaccharides	-	-	-	Organic oxygen compounds	Organooxygen compounds	Carbohydrates and carbohydrate conjugates	69.1	-	-	-	1.0255	1.047	0.9591	0.007676	0.06172	4.6786	4.9487	4.927	5.1354	4.9877	4.9856	5.1724	5.0699	5.1877	5.1914	5.1525	5.1562
pos_18937	(R)-(+)-2-Pyrrolidone-5-carboxylic acid	metab_17822	yes	down	-	pos	-	130.05	0.688	M+H	C5H7NO3	76.8	-	-	-	-	-	-	-	-	-	-	76.8	-	-	-	1.0094	0.9272	0.9704	0.01143	0.07606	6.3596	6.6649	6.3491	6.3465	6.429	6.5824	6.7328	6.7271	6.5648	6.657	6.5612	6.6678
pos_18942	Lactulose	metab_17827	yes	up	C07064	pos	4618-18-2	365.105	0.683983	M+Na	C12H22O11	53.5	-	HMDB0000740	-	-	-	-	-	Organic oxygen compounds	Organooxygen compounds	Carbohydrates and carbohydrate conjugates	53.5	-	-	-	1.096	1.0413	1.0376	0.009119	0.06785	6.5688	6.6087	6.8441	6.5606	6.6447	6.5621	6.6058	6.3685	6.466	6.266	6.1989	6.4409
pos_19029	Beta-Alanyl-L-arginine	metab_17903	yes	down	C05340	pos	-	246.156	0.662233	M+H	C9H19N5O3	51.2	-	HMDB0060441	-	-	map01100;map00410	Metabolism;Metabolism	Global and overview maps;Metabolism of other amino acids	Organic acids and derivatives	Peptidomimetics	Hybrid peptides	51.2	-	Metabolic pathways; beta-Alanine metabolism	Metabolic pathways; beta-Alanine metabolism	1.6716	1.5972	0.8785	0.01874	0.1009	4.6429	4.0062	4.4334	4.6877	4.7703	4.1293	5.024	4.9875	4.6137	5.5028	5.6347	4.5955
pos_19379	Spermine	metab_18218	yes	up	C00750	pos	71-44-3	203.223	0.5935	M+H	C10H26N4	92.3	-	HMDB0001256	-	-	map01100;map04976;map00480;map00330;map00410	Metabolism;Organismal Systems;Metabolism;Metabolism;Metabolism	Global and overview maps;Digestive system;Metabolism of other amino acids;Amino acid metabolism;Metabolism of other amino acids	Organic nitrogen compounds	Organonitrogen compounds	Amines	92.3	-	Metabolic pathways; Bile secretion; Glutathione metabolism; Arginine and proline metabolism; beta-Alanine metabolism	Metabolic pathways; Bile secretion; Glutathione metabolism; Arginine and proline metabolism; beta-Alanine metabolism	2.1364	2.0661	1.324	0.03628	0.1496	4.097	5.0215	4.1697	4.6428	5.009	3.2454	2.8007	3.8745	4.7734	2.7683	2.7403	2.8171
pos_19397	D-Ornithine	metab_18234	yes	down	C00515	pos	348-66-3	133.097	0.586	M+H	C5H12N2O2	77.3	-	HMDB0003374	-	-	map01100;map00472;map00997;map01110	Metabolism;Metabolism;Metabolism;Metabolism	Global and overview maps;Metabolism of other amino acids;Biosynthesis of other secondary metabolites;Global and overview maps	Organic acids and derivatives	Carboxylic acids and derivatives	Amino acids, peptides, and analogues	77.3	-	Metabolic pathways; D-Arginine and D-ornithine metabolism; Biosynthesis of various secondary metabolites - part 3; Biosynthesis of secondary metabolites	Metabolic pathways; D-Arginine and D-ornithine metabolism; Biosynthesis of various secondary metabolites - part 3; Biosynthesis of secondary metabolites	1.8561	1.7348	0.8659	0.006553	0.05653	3.9369	4.2856	3.8167	4.5956	3.8931	4.7623	4.7726	4.8323	4.5074	4.9143	5.2663	4.9121
pos_16669	Indole-3-carboxaldehyde	metab_18454	yes	up	C08493	pos	487-89-8	146.06	3.37515	M+H	C9H7NO	91.5	-	HMDB0029737;HMDB0000197;HMDB0000195;MJDBSJD0000088	-	-	-	-	-	Organoheterocyclic compounds	Indoles and derivatives	Indoles	91.5	-	-	-	1.3415	1.2877	1.072	0.008242	0.0641	5.217	5.2733	5.1309	5.5654	5.6869	5.1185	5.1002	5.0269	5.0773	4.8396	4.8151	4.9869
pos_5281	Isonicotinic acid	metab_18455	yes	down	C07446	pos	55-22-1	124.039	1.16903	M+H	C6H5NO2	67.2	-	HMDB0060665;HMDB0041912	-	-	map00983	Metabolism	Xenobiotics biodegradation and metabolism	Organoheterocyclic compounds	Pyridines and derivatives	Pyridinecarboxylic acids and derivatives	67.2	-	Drug metabolism - other enzymes	Drug metabolism - other enzymes	1.1941	1.1123	0.9639	0.005771	0.05276	7.0806	7.2453	6.9122	6.848	7.0746	7.2874	7.3605	7.458	7.2895	7.3425	7.3034	7.2877

## Sheet: HHP vs Blank
ID	Metabolite	Metab ID	Significant	Regulate	KEGG Compound ID	Mode	CAS ID	M/Z	Retention time	Adducts	Formula	Fragmentation Score	Theoretical Fragmentation Score	Library ID	KEGG Compound First Category	KEGG Compound Second Category	KEGG Pathway ID	KEGG Pathway First Category	KEGG Pathway Second Category	HMDB Superclass	HMDB Class	HMDB Subclass	Fragmentation Score	Theoretical Fragmentation Score	KEGG Pathway Description	KEGG Pathway Description	VIP_pred_OPLS-DA	VIP_PLS-DA	FC(HHP/Control)	P_value	FDR	HHP_1	HHP_2	HHP_3	HHP_4	HHP_5	HHP_6	Blank_1	Blank_2	Blank_3	Blank_4	Blank_5	Blank_6
neg_33	Albocycline	metab_18494	yes	down	-	neg	-	307.192	6.52013	M-H, 2M-H, M-H2O-H	C18H28O4	72.7	-	-	-	-	-	-	-	-	-	-	72.7	-	-	-	1.2123	1.1399	0.9642	0.005681	0.05649	6.9715	7.0835	6.9072	7.1287	7.1542	7.0441	7.3047	7.5473	7.0861	7.3007	7.3985	7.2211
neg_44	Phosphatidylethanolamine lyso alkenyl 16:0	metab_18505	yes	down	-	neg	-	436.283	7.0372	M-H, M+Na-2H, 2M-H	C21H44NO6P	53.7	-	-	-	-	-	-	-	-	-	-	53.7	-	-	-	1.8611	1.8116	0.9252	0.0006207	0.01784	7.0276	7.4168	7.196	6.6802	6.9099	6.9073	7.4501	7.5069	7.5804	7.6923	7.7739	7.5399
neg_146	Deoxyinosine	metab_18605	yes	down	C05512	neg	890-38-0	251.079	3.01603	M-H, M+Na-2H	C10H12N4O4	88.7	-	HMDB0000071	-	-	map01100;map02010;map00230	Metabolism;Environmental Information Processing;Metabolism	Global and overview maps;Membrane transport;Nucleotide metabolism	Nucleosides, nucleotides, and analogues	Purine nucleosides	Purine 2'-deoxyribonucleosides	88.7	-	Metabolic pathways; ABC transporters; Purine metabolism	Metabolic pathways; ABC transporters; Purine metabolism	1.539	1.5152	0.9488	0.0001739	0.01062	6.9932	6.8769	6.7866	6.7487	6.6794	6.678	7.1901	7.1757	7.2079	6.9693	7.2061	7.2173
neg_200	(R)-2,3-Dihydro-3,5-dihydroxy-2-oxo-3-indoleacetic acid	metab_18658	yes	up	-	neg	-	222.041	0.7628	M-H2O-H, M-H	C10H9NO5	-	63.8	HMDB0038941	-	-	-	-	-	Organoheterocyclic compounds	Indoles and derivatives	Indolyl carboxylic acids and derivatives	-	63.8	-	-	2.0396	1.8933	1.1074	3.604e-05	0.005323	5.9797	6.2111	6.1934	6.1307	6.0752	5.8411	5.6266	5.2405	5.5939	5.4149	5.4294	5.593
neg_262	SM(d18:1/12:0)	metab_18720	yes	up	C00550	neg	-	645.495	6.41662	M-2H, M-H	C35H71N2O6P	-	55.1	LMSP03010002;HMDB0012096	Lipids	Phospholipids	map00600;map01100;map04071;map04217	Metabolism;Metabolism;Environmental Information Processing;Cellular Processes	Lipid metabolism;Global and overview maps;Signal transduction;Cell growth and death	Lipids and lipid-like molecules	Sphingolipids	Phosphosphingolipids	-	55.1	Sphingolipid metabolism; Metabolic pathways; Sphingolipid signaling pathway; Necroptosis	Sphingolipid metabolism; Metabolic pathways; Sphingolipid signaling pathway; Necroptosis	1.3255	1.2785	1.0561	0.01032	0.07672	6.3398	6.3592	6.5346	6.5109	6.4892	6.3856	6.0866	6.3331	6.2381	5.7512	5.8326	6.3258
neg_380	(3beta,5alpha,6beta,9alpha,22E,24R)-23-Methylergosta-7,22-diene-3,5,6,9-tetrol	metab_18837	yes	down	-	neg	243449-55-0	459.348	7.1597	M-H, M+Na-2H	C29H48O4	-	52.9	HMDB0033634	-	-	-	-	-	Lipids and lipid-like molecules	Steroids and steroid derivatives	Ergostane steroids	-	52.9	-	-	1.3191	1.2262	0.9491	0.0328	0.142	7.0839	6.6769	7.1338	6.7552	6.3594	6.745	7.2433	7.2279	6.8746	7.4719	6.9346	7.1839
neg_387	Phosphatidylethanolamine lyso alkenyl 18:0	metab_18844	yes	down	-	neg	-	464.315	7.19983	M-H, M+Na-2H	C23H48NO6P	72	-	-	-	-	-	-	-	-	-	-	72	-	-	-	1.3554	1.3133	0.9506	0.00449	0.04979	6.5035	6.8155	6.6033	6.3097	6.3955	6.5067	6.7614	6.7045	6.8756	6.9383	7.101	6.784
neg_642	N-acetylaspartate	metab_19098	yes	down	C01042	neg	-	174.04	0.567217	M-H	C6H9NO5	95.8	-	HMDB0000812	-	-	map01100;map00250	Metabolism;Metabolism	Global and overview maps;Amino acid metabolism	Organic acids and derivatives	Carboxylic acids and derivatives	Amino acids, peptides, and analogues	95.8	-	Metabolic pathways; Alanine, aspartate and glutamate metabolism	Metabolic pathways; Alanine, aspartate and glutamate metabolism	1.9218	1.8469	0.9053	4.724e-05	0.005662	5.0727	5.4868	5.1702	4.9979	5.1528	5.2616	5.7718	5.8071	5.5427	5.7649	5.7596	5.7523
neg_649	N-Acetyl-L-glutamic acid	metab_19105	yes	down	C00624	neg	1188-37-0	188.056	0.5739	M-H	C7H11NO5	85.4	-	HMDB0001138	-	-	map01100;map01210;map00220;map01110;map01230	Metabolism;Metabolism;Metabolism;Metabolism;Metabolism	Global and overview maps;Global and overview maps;Amino acid metabolism;Global and overview maps;Global and overview maps	Organic acids and derivatives	Carboxylic acids and derivatives	Amino acids, peptides, and analogues	85.4	-	Metabolic pathways; 2-Oxocarboxylic acid metabolism; Arginine biosynthesis; Biosynthesis of secondary metabolites; Biosynthesis of amino acids	Metabolic pathways; 2-Oxocarboxylic acid metabolism; Arginine biosynthesis; Biosynthesis of secondary metabolites; Biosynthesis of amino acids	1.2045	1.1977	0.9597	0.001553	0.02909	5.9948	6.18	5.9752	6.1703	5.9814	5.833	6.3161	6.3533	6.2301	6.2718	6.1967	6.2819
neg_657	Glu-Thr	metab_19113	yes	down	-	neg	-	247.093	0.591383	M-H	C9H16N2O6	72.4	-	HMDB0028829	-	-	-	-	-	Organic acids and derivatives	Carboxylic acids and derivatives	Amino acids, peptides, and analogues	72.4	-	-	-	1.1133	1.0504	0.9511	0.02224	0.1172	4.9105	5.1278	4.9901	4.6748	5.0725	5.0712	5.3012	5.1424	4.996	5.3779	5.4164	5.1451
neg_661	5-L-Glutamyl-L-alanine	metab_19117	yes	down	C03740	neg	-	217.083	0.5947	M-H	C8H14N2O5	68.3	-	HMDB0006248	-	-	map01100;map00480	Metabolism;Metabolism	Global and overview maps;Metabolism of other amino acids	Organic acids and derivatives	Carboxylic acids and derivatives	Amino acids, peptides, and analogues	68.3	-	Metabolic pathways; Glutathione metabolism	Metabolic pathways; Glutathione metabolism	2.0739	1.9588	0.8863	6.511e-05	0.006893	5.0327	5.0407	4.9548	4.8862	4.9575	5.0565	5.7757	5.637	5.2804	5.785	5.8648	5.4245
neg_758	Taurine	metab_19214	yes	up	C00245	neg	107-35-7	124.007	0.651083	M-H	C2H7NO3S	77.2	-	HMDB0000251	-	-	map01100;map00920;map00430;map02010;map00120;map04080	Metabolism;Metabolism;Metabolism;Environmental Information Processing;Metabolism;Environmental Information Processing	Global and overview maps;Energy metabolism;Metabolism of other amino acids;Membrane transport;Lipid metabolism;Signaling molecules and interaction	Organic acids and derivatives	Organic sulfonic acids and derivatives	Organosulfonic acids and derivatives	77.2	-	Metabolic pathways; Sulfur metabolism; Taurine and hypotaurine metabolism; ABC transporters; Primary bile acid biosynthesis; Neuroactive ligand-receptor interaction	Metabolic pathways; Sulfur metabolism; Taurine and hypotaurine metabolism; ABC transporters; Primary bile acid biosynthesis; Neuroactive ligand-receptor interaction	1.7614	1.73	1.1143	0.01907	0.107	5.9144	6.381	6.3881	5.9413	6.207	6.2405	5.6762	5.0992	5.7025	5.0713	5.2862	6.4373
neg_794	Citrulline	metab_19248	yes	down	C00327	neg	372-75-8	174.088	0.702233	M-H	C6H13N3O3	85.8	-	HMDB0000904	Peptides	Amino acids	map01100;map00220;map00997;map01110;map01230	Metabolism;Metabolism;Metabolism;Metabolism;Metabolism	Global and overview maps;Amino acid metabolism;Biosynthesis of other secondary metabolites;Global and overview maps;Global and overview maps	Organic acids and derivatives	Carboxylic acids and derivatives	Amino acids, peptides, and analogues	85.8	-	Metabolic pathways; Arginine biosynthesis; Biosynthesis of various secondary metabolites - part 3; Biosynthesis of secondary metabolites; Biosynthesis of amino acids	Metabolic pathways; Arginine biosynthesis; Biosynthesis of various secondary metabolites - part 3; Biosynthesis of secondary metabolites; Biosynthesis of amino acids	1.5395	1.4481	0.9395	0.0002357	0.01119	5.5989	5.6153	5.4614	5.7024	5.653	5.6979	5.8254	6.1546	6.0237	5.9356	6.099	5.8604
neg_902	Deoxyadenosine monophosphate	metab_19354	yes	down	C00360	neg	653-63-4	330.061	0.767583	M-H	C10H14N5O6P	80.9	-	HMDB0000905	Nucleic acids	Nucleotides	map01100;map00230	Metabolism;Metabolism	Global and overview maps;Nucleotide metabolism	Nucleosides, nucleotides, and analogues	Purine nucleotides	Purine deoxyribonucleotides	80.9	-	Metabolic pathways; Purine metabolism	Metabolic pathways; Purine metabolism	2.9565	2.7881	0.6883	0.006541	0.06075	3.7316	3.1554	3.6034	4.2293	3.17	3.1467	5.3431	4.7524	3.1287	5.5732	5.8987	5.8666
neg_1171	4-Vinylphenol	metab_19620	yes	up	C05627	neg	2628-17-3	165.055	2.51557	M+FA-H	C8H8O	69.9	-	HMDB0004072	-	-	map00940	Metabolism	Biosynthesis of other secondary metabolites	Benzenoids	Benzene and substituted derivatives	Styrenes	69.9	-	Phenylpropanoid biosynthesis	Phenylpropanoid biosynthesis	1.1042	1.079	1.0527	0.04246	0.1626	5.3316	5.2554	5.8468	5.3018	5.2297	5.2887	5.2149	4.9881	5.321	5.013	4.9066	5.1973
neg_1248	Ferulic acid	metab_19695	yes	up	C01494	neg	537-98-4	193.05	2.98245	M-H	C10H10O4	81.8	-	HMDB0125096;HMDB0000954	-	-	map01100;map00940;map01110;map01061	Metabolism;Metabolism;Metabolism;Metabolism	Global and overview maps;Biosynthesis of other secondary metabolites;Global and overview maps;Chemical structure transformation maps	Phenylpropanoids and polyketides	Cinnamic acids and derivatives	Hydroxycinnamic acids and derivatives	81.8	-	Metabolic pathways; Phenylpropanoid biosynthesis; Biosynthesis of secondary metabolites; Biosynthesis of phenylpropanoids	Metabolic pathways; Phenylpropanoid biosynthesis; Biosynthesis of secondary metabolites; Biosynthesis of phenylpropanoids	1.108	1.0877	1.0448	0.03296	0.1423	6.8194	6.4024	6.8601	6.2856	6.5301	6.7051	6.4244	6.3984	6.4839	6.1652	6.0808	6.347
neg_1292	Threoninyl-Isoleucine	metab_19739	yes	down	-	neg	-	231.135	3.2131	M-H	C10H20N2O4	-	61.7	HMDB0029064	-	-	-	-	-	Organic acids and derivatives	Carboxylic acids and derivatives	Amino acids, peptides, and analogues	-	61.7	-	-	1.8464	1.7368	0.8944	0.004837	0.05171	5.0707	4.9705	4.8863	4.9011	4.8728	5.2199	5.6428	5.5363	4.9059	5.8909	5.9667	5.5137
neg_1471	6-Ethoxy-3(4'-hydroxyphenyl)-4-methylcoumarin	metab_19917	yes	up	-	neg	-	341.103	4.087	M+FA-H	C18H16O4	81.1	-	-	-	-	-	-	-	-	-	-	81.1	-	-	-	1.2067	1.1892	1.061	0.02235	0.1174	5.8138	5.3727	5.8697	5.3868	5.6514	5.9095	5.5273	5.4828	5.4266	5.2179	5.0668	5.3222
neg_1630	2-(4-Hydroxyphenyl)ethanol	metab_20076	yes	down	C06044	neg	-	137.06	5.0286	M-H	C8H10O2	65.4	-	HMDB0004284	-	-	map01100;map00350	Metabolism;Metabolism	Global and overview maps;Amino acid metabolism	Benzenoids	Phenols	Tyrosols and derivatives	65.4	-	Metabolic pathways; Tyrosine metabolism	Metabolic pathways; Tyrosine metabolism	2.1786	2.0816	0.8744	1.146e-05	0.002695	4.7768	4.9798	4.829	4.8996	4.7702	4.7641	5.4841	5.7122	5.4485	5.6156	5.7229	5.2116
neg_1776	Geosmin	metab_20221	yes	up	C16286	neg	19700-21-1	227.165	5.89238	M+FA-H	C12H22O	-	57.4	HMDB0036461	-	-	map01110;map00909	Metabolism;Metabolism	Global and overview maps;Metabolism of terpenoids and polyketides	Organic oxygen compounds	Organooxygen compounds	Alcohols and polyols	-	57.4	Biosynthesis of secondary metabolites; Sesquiterpenoid and triterpenoid biosynthesis	Biosynthesis of secondary metabolites; Sesquiterpenoid and triterpenoid biosynthesis	1.7573	1.6509	1.1206	0.004229	0.04836	4.7219	5.0937	5.2331	4.7809	5.1496	4.8959	4.7169	4.1218	4.3218	4.2286	4.4029	4.864
neg_1808	L-phenylalanyl-L-proline	metab_20253	yes	down	-	neg	-	261.124	6.03523	M-H	C14H18N2O3	60.2	-	HMDB0011177	-	-	-	-	-	Organic acids and derivatives	Carboxylic acids and derivatives	Amino acids, peptides, and analogues	60.2	-	-	-	1.069	1.0083	0.9609	0.01823	0.1045	5.5752	5.6827	5.6075	5.4178	5.7222	5.7469	5.8874	5.7575	5.6616	5.9925	6.0728	5.7537
neg_1923	1-Methoxy-3-carbaldehyde	metab_20366	yes	up	-	neg	-	220.061	6.26075	M+FA-H	C10H9NO2	52.7	-	-	-	-	-	-	-	-	-	-	52.7	-	-	-	1.2743	1.241	1.0588	0.01568	0.09698	5.5522	5.6588	5.7954	5.4011	5.6797	5.4277	5.2967	5.2368	5.6171	5.0877	5.034	5.3816
neg_1924	Valyl-Isoleucine	metab_20367	yes	down	-	neg	-	229.156	6.26075	M-H	C11H22N2O3	-	65.2	HMDB0029130	-	-	-	-	-	Organic acids and derivatives	Carboxylic acids and derivatives	Amino acids, peptides, and analogues	-	65.2	-	-	1.5682	1.5003	0.896	0.03265	0.1418	4.62	3.9165	4.3508	3.7167	4.3361	4.3943	4.5132	5.3028	4.8507	4.4586	4.3546	4.7947
neg_1940	[4-(7-hydroxy-3,4-dihydro-2H-1-benzopyran-3-yl)phenyl]oxidanesulfonic acid	metab_20383	yes	up	-	neg	-	321.044	6.26862	M-H	C15H14O6S	-	67.5	HMDB0141213	-	-	-	-	-	Phenylpropanoids and polyketides	Isoflavonoids	Isoflavans	-	67.5	-	-	2.0509	2.0084	1.2069	0.04248	0.1626	5.1355	6.3907	6.1581	4.8578	4.8775	5.0991	5.1063	3.8952	4.5915	3.8918	3.9281	5.5343
neg_1947	[2-hydroxy-5-(7-hydroxy-4-oxo-4H-chromen-2-yl)phenyl]oxidanesulfonic acid	metab_20390	yes	up	-	neg	-	349.002	6.2729	M-H	C15H10O8S	-	56.4	HMDB0133329	-	-	-	-	-	Phenylpropanoids and polyketides	Flavonoids	Flavones	-	56.4	-	-	2.716	2.5891	1.3552	0.003893	0.04631	4.9672	4.9829	6.2267	4.4626	4.4833	5.1162	4.3933	3.2692	3.2178	3.7212	3.2452	4.4664
neg_2136	Ononetin	metab_20564	yes	down	-	neg	-	257.082	6.41662	M-H	C15H14O4	61.4	-	-	-	-	-	-	-	-	-	-	61.4	-	-	-	1.4698	1.3405	0.9284	0.03162	0.1395	5.791	5.1736	5.8641	5.2082	5.78	6.124	5.9684	6.0371	6.0157	6.3826	6.2711	5.8812
neg_2447	13,14-Dihydro PGF-1a	metab_20847	yes	down	-	neg	-	339.254	6.68677	M-H2O-H	C20H38O5	-	82.1	HMDB0005076	-	-	-	-	-	Lipids and lipid-like molecules	Fatty Acyls	Eicosanoids	-	82.1	-	-	1.1057	1.0365	0.9552	0.01608	0.09813	5.1016	4.8397	5.1333	5.0585	5.2469	5.181	5.3818	5.3406	5.18	5.2567	5.5927	5.2445
neg_2467	25-Hydroxytachysterol3	metab_20866	yes	up	-	neg	39932-44-0	445.333	6.70298	M+FA-H	C27H44O2	-	51.9	HMDB0006722	-	-	-	-	-	Lipids and lipid-like molecules	Steroids and steroid derivatives	Vitamin D and derivatives	-	51.9	-	-	1.1966	1.1129	1.0394	0.0007035	0.01862	5.8118	6.0028	5.8162	5.8783	5.9408	5.8533	5.686	5.6721	5.8076	5.5583	5.6175	5.6252
neg_2530	17,23-Epoxy-29-hydroxy-27-norlanost-8-ene-3,15,24-trione	metab_20926	yes	down	-	neg	-	491.278	6.76082	M+Na-2H	C29H42O5	-	58.5	HMDB0035113	-	-	-	-	-	Lipids and lipid-like molecules	Prenol lipids	Triterpenoids	-	58.5	-	-	1.5206	1.5531	0.927	0.01621	0.09865	6.0604	6.2011	6.2645	5.4845	5.6541	5.7766	6.38	6.3353	6.3519	5.9632	6.5359	6.6634
neg_2558	[2,4-dihydroxy-1-(1-oxo-1H-isochromen-3-yl)butoxy]sulfonic acid	metab_20950	yes	up	-	neg	-	375.042	6.80087	M+FA-H	C13H14O8S	-	56.8	HMDB0130089	-	-	-	-	-	Phenylpropanoids and polyketides	Isocoumarins and derivatives	Not Available	-	56.8	-	-	1.3018	1.2033	1.0738	0.02175	0.1153	4.4649	4.9003	5.1625	4.9306	4.858	4.4806	4.4867	4.6921	4.3688	4.4169	4.3963	4.4533
neg_2559	1-nonadecanoyl-glycero-3-phosphate	metab_20951	yes	down	-	neg	-	497.289	6.80087	M+FA-H	C22H45O7P	-	76.2	HMDB0062322;LMGP10050034;HMDB0114746	-	-	-	-	-	Lipids and lipid-like molecules	Glycerophospholipids	Glycerophosphates	-	76.2	-	-	1.8305	1.7785	0.9068	0.004714	0.05118	6.1096	6.7504	5.8927	5.7523	5.666	5.7277	6.6085	6.6069	6.4359	6.6688	6.6456	6.6203
neg_2566	25-Cinnamoyl-vulgaroside	metab_20958	yes	up	-	neg	172616-90-9	565.315	6.81805	M-H	C34H46O7	-	69	HMDB0041367	-	-	-	-	-	Lipids and lipid-like molecules	Prenol lipids	Sesterterpenoids	-	69	-	-	3.3585	3.3883	1.6557	0.02726	0.1301	5.8532	6.2628	6.1567	5.5594	6.0987	4.9794	4.6549	1.6178	5.9329	1.6146	1.5945	5.6722
neg_2587	1-Stearoylglycerophosphoglycerol	metab_20977	yes	down	-	neg	-	511.304	6.85497	M-H	C24H49O9P	-	89.1	HMDB0061697	-	-	-	-	-	Lipids and lipid-like molecules	Glycerophospholipids	Glycerophosphoglycerols	-	89.1	-	-	1.2766	1.2269	0.9542	0.01034	0.07672	6.8897	6.9919	6.6132	6.575	6.4953	6.4394	7.0805	6.9969	6.7802	7.0825	7.0161	6.9684
neg_2653	2-Nonenoic acid	metab_21038	yes	up	-	neg	3760-11-0	467.338	6.9099	3M-H	C9H16O2	-	82.4	HMDB0031271	-	-	-	-	-	Lipids and lipid-like molecules	Fatty Acyls	Fatty acids and conjugates	-	82.4	-	-	1.7234	1.7025	1.1298	0.01691	0.1011	4.6385	5.2033	5.1184	4.5792	5.0017	5.0236	4.4219	4.2034	4.3943	4.2056	5.0888	3.85
neg_2667	Phosphatidylethanolamine lyso 20:4	metab_21051	yes	down	-	neg	-	500.278	6.923	M-H	C25H44NO7P	68.1	-	-	-	-	-	-	-	-	-	-	68.1	-	-	-	1.2207	1.1487	0.9529	0.01714	0.1016	5.8615	5.5169	5.8595	5.6801	5.7278	5.8227	5.9945	6.1011	5.6732	6.059	6.3006	6.0442
neg_2739	Muricatacin	metab_21117	yes	up	-	neg	134698-86-5	567.464	6.98703	2M-H	C17H32O3	-	70.9	HMDB0038685;LMFA05000682	-	-	-	-	-	Lipids and lipid-like molecules	Fatty Acyls	Fatty alcohols	-	70.9	-	-	1.1035	1.122	1.0493	0.03666	0.15	5.9382	5.8182	5.9804	5.7757	6.0051	5.8832	5.8619	5.8031	5.8046	5.3989	5.1999	5.672
neg_2811	Dehydrophytosphingosine	metab_21185	yes	down	-	neg	3687-54-5	314.27	7.04802	M-H	C18H37NO3	-	73	LMSP01030002;HMDB0038057	-	-	-	-	-	Organic nitrogen compounds	Organonitrogen compounds	Amines	-	73	-	-	1.8488	1.8686	0.8219	0.04814	0.1757	4.7759	4.2208	3.5216	3.373	3.3753	3.3864	4.1335	4.9287	4.6333	4.9891	5.3607	3.5172
neg_2866	1-(9Z,12Z-Octadecadienoyl-2-hydroxy-sn-glycero-3-phosphocholine	metab_21239	yes	down	-	neg	-	518.325	7.09757	M-H	C26H50NO7P	70.6	-	-	-	-	-	-	-	-	-	-	70.6	-	-	-	1.8892	1.7907	0.9072	0.0006123	0.01768	5.6112	5.5305	5.974	5.4112	5.4817	5.5925	6.0471	6.2249	6.01	6.3008	6.4975	5.9571
neg_3076	Olean-12-en-28-oic acid, 2,3,19-trihydroxy-, (2alpha,3beta,5xi,9xi,19alpha)-	metab_21427	yes	down	-	neg	-	487.343	7.30195	M-H	C30H48O5	58.9	-	-	-	-	-	-	-	-	-	-	58.9	-	-	-	1.6074	1.4685	0.9012	0.0364	0.1498	5.3363	4.1857	5.1089	4.5928	4.7815	4.8982	5.2828	5.4405	4.9791	5.8682	4.9473	5.5517
neg_3367	Icos-19-ene-1,2,4-triol	metab_21697	yes	down	-	neg	-	327.291	7.6073	M-H	C20H40O3	79.3	-	-	-	-	-	-	-	-	-	-	79.3	-	-	-	1.7262	1.6531	0.891	0.008168	0.06809	4.5831	4.6809	3.917	4.6166	4.5054	4.7229	4.9796	5.0459	4.797	5.1362	5.5637	4.808
neg_3580	2-Hexaprenyl-6-methoxy-1,4-benzoquinol	metab_21903	yes	up	-	neg	-	593.422	8.2971	M+FA-H	C37H56O3	-	52.2	HMDB0012148	-	-	-	-	-	Lipids and lipid-like molecules	Prenol lipids	Polyprenylphenols	-	52.2	-	-	1.7518	1.6847	1.1261	0.02419	0.1207	5.8039	5.9099	5.9013	5.179	6.0334	6.3154	5.0299	5.2342	6.0386	4.5759	5.1817	5.1462
neg_4158	MG(P-18:0e/0:0/0:0)	metab_22470	yes	down	-	neg	-	341.306	7.7547	M-H	C21H42O3	-	59.2	-	-	-	-	-	-	-	-	-	-	59.2	-	-	1.4582	1.3632	0.943	0.002641	0.03779	5.9817	6.0665	5.6262	5.893	5.7565	6.0932	6.2218	6.3464	6.2339	6.211	6.4507	6.0957
neg_4540	2-Hydroxy-5 (6)Epoxy-Tetrahydrocaryophyllene	metab_22824	yes	down	-	neg	-	475.379	7.31257	2M-H	C15H26O2	50.6	-	-	-	-	-	-	-	-	-	-	50.6	-	-	-	2.6262	2.5233	0.7843	0.0006519	0.01815	4.0057	3.8151	3.8424	3.819	3.9142	3.9434	4.7559	5.4572	4.9563	5.5579	4.0817	4.9493
neg_4754	DG(15:0/18:2(9Z,12Z)/0:0)	metab_23024	yes	up	-	neg	-	577.484	7.1513	M-H	C36H66O5	-	64.8	HMDB0007074	-	-	-	-	-	Lipids and lipid-like molecules	Fatty Acyls	Lineolic acids and derivatives	-	64.8	-	-	1.3992	1.4051	1.0781	0.02312	0.1184	5.7449	5.8107	5.6027	5.6992	5.9097	5.8663	5.4617	5.4368	5.7341	4.871	4.9472	5.6759
neg_4852	Phytosphingosine	metab_23116	yes	down	C12144	neg	554-62-1	338.27	7.07413	M+Na-2H	C18H39NO3	-	56.2	HMDB0004610;LMSP01030001	-	-	map00600;map01100	Metabolism;Metabolism	Lipid metabolism;Global and overview maps	Organic nitrogen compounds	Organonitrogen compounds	Amines	-	56.2	Sphingolipid metabolism; Metabolic pathways	Sphingolipid metabolism; Metabolic pathways	1.9458	1.8616	0.8638	0.01888	0.1062	5.485	5.5917	5.4444	4.4952	4.1339	4.6398	5.6206	6.0165	5.7719	6.0396	5.8086	5.2331
neg_4960	Dihydroceramide	metab_23214	yes	up	C12126	neg	-	364.265	6.98703	M+Cl	C19H39NO3	-	73	HMDB0006752;HMDB0011761	-	-	map00600;map01100;map04071	Metabolism;Metabolism;Environmental Information Processing	Lipid metabolism;Global and overview maps;Signal transduction	Organic acids and derivatives	Carboxylic acids and derivatives	Carboxylic acid derivatives	-	73	Sphingolipid metabolism; Metabolic pathways; Sphingolipid signaling pathway	Sphingolipid metabolism; Metabolic pathways; Sphingolipid signaling pathway	1.2536	1.188	1.0502	0.004779	0.05132	5.6855	5.9276	5.8533	5.8311	5.9765	6.1188	5.6949	5.4953	5.8123	5.6435	5.5265	5.5289
neg_5100	LysoPE(16:1(9Z)/0:0)	metab_23345	yes	down	-	neg	-	450.263	6.87888	M-H	C21H42NO7P	-	76.6	HMDB0011504	-	-	-	-	-	Lipids and lipid-like molecules	Glycerophospholipids	Glycerophosphoethanolamines	-	76.6	-	-	1.352	1.2987	0.9548	0.0001991	0.01107	6.1218	6.1118	6.0241	5.9649	5.8924	5.8942	6.2795	6.2423	6.1842	6.2937	6.3521	6.365
neg_5605	Paeonilactone B	metab_23807	yes	up	C17455	neg	-	177.055	6.4846	M-H2O-H	C10H12O4	82.2	-	-	-	-	-	-	-	-	-	-	82.2	-	-	-	1.213	1.1992	1.0721	0.01886	0.1062	4.7364	4.4764	4.7309	4.6587	4.5794	4.572	4.6169	4.3477	3.9087	4.2654	4.2196	4.5344
neg_5632	Ganoderic acid H	metab_23831	yes	up	-	neg	98665-19-1	553.284	6.46058	M-H2O-H	C32H44O9	-	82.8	HMDB0035987	-	-	-	-	-	Lipids and lipid-like molecules	Prenol lipids	Triterpenoids	-	82.8	-	-	2.145	2.0792	1.1384	9.418e-05	0.008351	5.5847	5.6931	5.5765	5.6648	5.6265	5.3147	4.8849	5.2617	5.0005	4.7178	4.9216	4.6097
neg_5699	8-Hepe	metab_23891	yes	up	-	neg	-	363.218	6.40693	M+FA-H	C20H30O3	64.5	-	-	-	-	-	-	-	-	-	-	64.5	-	-	-	1.0047	1.0271	1.0319	0.01014	0.07589	6.0585	6.1346	5.9537	5.8318	5.928	5.8533	5.7198	5.7401	5.7297	5.7687	5.9368	5.7596
neg_5703	Dihydro-alpha-ionone	metab_23894	yes	up	-	neg	39721-65-8	239.165	6.40693	M+FA-H	C13H22O	-	52.7	HMDB0038026	-	-	-	-	-	Lipids and lipid-like molecules	Prenol lipids	Sesquiterpenoids	-	52.7	-	-	1.3399	1.289	1.0787	0.0153	0.09585	4.8169	5.1337	4.7747	4.6992	4.9334	5.1592	4.8161	4.2079	4.703	4.474	4.4278	4.7403
neg_5708	Lucidenic acid M	metab_23899	yes	up	C10029	neg	110241-33-3	483.276	6.40125	M+Na-2H	C27H42O6	-	51.7	HMDB0035973	-	-	-	-	-	Phenylpropanoids and polyketides	Flavonoids	O-methylated flavonoids	-	51.7	-	-	1.4807	1.4234	1.106	0.03044	0.1377	5.6258	4.8698	5.2847	4.7938	4.8774	5.0417	4.7135	4.5272	4.8062	5.0123	3.9862	4.526
neg_5719	Leu-Leu-Leu	metab_23909	yes	down	-	neg	-	356.255	6.39555	M-H	C18H35N3O4	-	65.6	HMDB0094648	-	-	-	-	-	Organic acids and derivatives	Carboxylic acids and derivatives	Amino acids, peptides, and analogues	-	65.6	-	-	2.3752	2.2269	0.8427	0.0003275	0.01292	4.7027	4.5055	4.2591	4.7456	4.7522	4.8399	5.6	5.6329	4.9746	5.7706	5.8089	5.2098
neg_5737	Indole-3-Ethanol	metab_23925	yes	down	C00955	neg	-	160.076	6.38443	M-H	C10H11NO	80.1	-	HMDB0003447	-	-	map00380	Metabolism	Amino acid metabolism	Organoheterocyclic compounds	Indoles and derivatives	Indoles	80.1	-	Tryptophan metabolism	Tryptophan metabolism	2.9876	2.8572	0.7164	1.827e-06	0.0008467	3.2043	3.2193	3.2086	3.1852	3.1959	3.1852	4.5911	4.7732	4.3308	4.5438	4.6653	3.8987
neg_6057	L-Menthyl acetoacetate	metab_24232	yes	up	-	neg	59557-05-0	285.171	6.15652	M+FA-H	C14H24O3	-	51.2	HMDB0032369	-	-	-	-	-	Lipids and lipid-like molecules	Prenol lipids	Monoterpenoids	-	51.2	-	-	1.078	1.0554	1.0396	0.00416	0.04804	5.594	5.5398	5.5379	5.4327	5.6207	5.6732	5.4146	5.1741	5.2607	5.4267	5.3773	5.4721
neg_6085	Cyclohexanecarboxylic Acid	metab_24259	yes	up	C09822	neg	98-89-5	255.16	6.07255	2M-H	C7H12O2	78.4	-	HMDB0031342;MJDBOTE0000750	-	-	map01100;map00362;map01120	Metabolism;Metabolism;Metabolism	Global and overview maps;Xenobiotics biodegradation and metabolism;Global and overview maps	Organic acids and derivatives	Carboxylic acids and derivatives	Carboxylic acids	78.4	-	Metabolic pathways; Benzoate degradation; Microbial metabolism in diverse environments	Metabolic pathways; Benzoate degradation; Microbial metabolism in diverse environments	1.6495	1.6059	1.1026	0.004377	0.04903	5.3055	5.3183	5.2734	4.9687	5.3345	5.3443	4.8983	4.6601	5.1409	4.6189	4.318	4.9704
neg_6210	Glucose isomerase from streptomyces rubiginosus	metab_24384	yes	up	-	neg	9055-00-9	409.06	5.41143	M+FA-H	C17H17ClN2O3S	-	51.2	HMDB0032295	-	-	-	-	-	Benzenoids	Benzene and substituted derivatives	Benzenesulfonamides	-	51.2	-	-	1.9576	1.7801	1.1842	0.03858	0.1545	4.6879	5.9418	5.3489	4.9288	4.6602	4.093	4.2558	3.362	3.9953	4.1883	4.6936	4.5468
neg_6285	Valyl-Valine	metab_24458	yes	down	-	neg	-	215.14	4.98378	M-H	C10H20N2O3	-	63.4	HMDB0029140	-	-	-	-	-	Organic acids and derivatives	Carboxylic acids and derivatives	Amino acids, peptides, and analogues	-	63.4	-	-	1.8234	1.6825	0.9114	0.001234	0.0252	5.4517	5.4026	5.2165	5.2335	5.2765	5.7008	6.0087	5.8919	5.4772	6.067	6.065	5.9056
neg_6392	Gentisic acid	metab_24565	yes	up	C00628	neg	490-79-9	153.019	4.34582	M-H	C7H6O4	69.8	-	HMDB0000152;HMDB0059999	-	-	map00626;map00362;map01100;map01120;map00350	Metabolism;Metabolism;Metabolism;Metabolism;Metabolism	Xenobiotics biodegradation and metabolism;Xenobiotics biodegradation and metabolism;Global and overview maps;Global and overview maps;Amino acid metabolism	Benzenoids	Benzene and substituted derivatives	Benzoic acids and derivatives	69.8	-	Naphthalene degradation; Benzoate degradation; Metabolic pathways; Microbial metabolism in diverse environments; Tyrosine metabolism	Naphthalene degradation; Benzoate degradation; Metabolic pathways; Microbial metabolism in diverse environments; Tyrosine metabolism	1.2923	1.2693	1.073	0.04158	0.1612	5.2559	5.863	5.756	5.0826	5.2945	5.4824	5.4754	4.9387	5.1255	4.8851	4.8477	5.236
neg_6462	N-Acetyl Mesalazine	metab_24635	yes	up	-	neg	-	176.035	4.00553	M-H2O-H	C9H9NO4	66.6	-	-	-	-	-	-	-	-	-	-	66.6	-	-	-	1.0355	1.024	1.0396	0.008662	0.07027	5.2612	5.0996	5.4146	5.2995	5.334	5.2417	5.1787	5.0041	4.8848	5.13	5.1169	5.127
neg_6501	Isoleucyl-Threonine	metab_24674	yes	down	-	neg	-	231.135	3.81317	M-H	C10H20N2O4	-	57.8	HMDB0028917	-	-	-	-	-	Organic acids and derivatives	Carboxylic acids and derivatives	Amino acids, peptides, and analogues	-	57.8	-	-	1.3089	1.2528	0.9348	0.0278	0.1316	5.2233	5.6672	5.3246	4.9705	5.3398	5.399	5.7405	5.5656	5.3664	5.9718	6.0321	5.4742
neg_6503	L-Leucyl-L- Alanine	metab_24676	yes	down	-	neg	-	201.124	3.8001	M-H	C9H18N2O3	61.2	-	-	-	-	-	-	-	-	-	-	61.2	-	-	-	1.2704	1.213	0.9425	0.02174	0.1153	5.3404	5.4564	5.4486	5.2846	5.5548	5.5405	5.7987	5.5978	5.3788	6.0952	6.0739	5.6732
neg_6704	N-Acetyl-DL-methionine	metab_24875	yes	down	-	neg	-	190.054	2.83172	M-H	C7H13NO3S	85.6	-	-	-	-	-	-	-	-	-	-	85.6	-	-	-	1.2821	1.2342	0.9478	0.004739	0.0512	5.4072	5.6351	5.629	5.654	5.3924	5.4147	5.6284	5.9712	5.8489	5.931	5.9559	5.6232
neg_6718	Serylisoleucine	metab_24889	yes	down	-	neg	91086-51-0	217.119	2.74935	M-H	C9H18N2O4	-	82	HMDB0029042	-	-	-	-	-	Organic acids and derivatives	Carboxylic acids and derivatives	Amino acids, peptides, and analogues	-	82	-	-	1.4691	1.3992	0.9271	0.01001	0.07553	5.1917	5.5661	5.3717	5.0088	5.1964	5.3206	5.7179	5.5665	5.3413	5.9532	6.0174	5.5483
neg_6784	Xanthosine	metab_24954	yes	down	C01762	neg	146-80-5	283.068	2.2867	M-H	C10H12N4O6	90	-	HMDB0000299	-	-	map01100;map01110;map00230;map00232;map02010;map01065	Metabolism;Metabolism;Metabolism;Metabolism;Environmental Information Processing;Metabolism	Global and overview maps;Global and overview maps;Nucleotide metabolism;Biosynthesis of other secondary metabolites;Membrane transport;Chemical structure transformation maps	Nucleosides, nucleotides, and analogues	Purine nucleosides	Not Available	90	-	Metabolic pathways; Biosynthesis of secondary metabolites; Purine metabolism; Caffeine metabolism; ABC transporters; Biosynthesis of alkaloids derived from histidine and purine	Metabolic pathways; Biosynthesis of secondary metabolites; Purine metabolism; Caffeine metabolism; ABC transporters; Biosynthesis of alkaloids derived from histidine and purine	3.3527	3.1262	0.7126	0.0001385	0.009777	4.8718	3.6563	3.2546	4.032	4.4103	4.502	5.3203	5.9181	5.5029	5.8598	6.2759	5.8191
neg_6818	Orsellinic acid	metab_24988	yes	up	C01839	neg	-	167.034	1.89742	M-H	C8H8O4	76.3	-	LMPK13010001	-	-	-	-	-	-	-	-	76.3	-	-	-	1.1224	1.1141	1.0464	0.008691	0.07038	5.4787	5.2187	5.1838	5.226	5.4419	5.0821	5.0632	5.193	4.991	4.9636	5.0204	4.9989
neg_6964	4-Acetyl-2(3H)-benzoxazolone	metab_25133	yes	up	-	neg	70735-79-4	222.041	0.94805	M+FA-H	C9H7NO3	-	61.3	HMDB0040612	-	-	-	-	-	Organoheterocyclic compounds	Benzoxazoles	Benzoxazolones	-	61.3	-	-	2.0784	1.9325	1.1189	4.688e-05	0.005662	5.6586	5.8648	6.0035	5.8579	5.7981	5.5392	5.3113	4.9102	5.2288	5.1258	5.1613	5.2955
neg_7014	Gamma-Glu-Leu	metab_25180	yes	down	-	neg	-	259.13	0.781083	M-H	C11H20N2O5	64.5	-	HMDB0011171	-	-	-	-	-	Organic acids and derivatives	Carboxylic acids and derivatives	Amino acids, peptides, and analogues	64.5	-	-	-	1.3215	1.2418	0.9393	0.02121	0.1134	5.5344	5.6943	5.1935	5.1283	5.5302	5.5757	5.8951	5.7058	5.4407	6.0075	6.0087	5.7115
neg_7082	DTMP	metab_25248	yes	down	C00364	neg	-	321.049	0.755317	M-H	C10H15N2O8P	60.3	-	HMDB0001227	Nucleic acids	Nucleotides	map00240;map01100;map01523	Metabolism;Metabolism;Human Diseases	Nucleotide metabolism;Global and overview maps;Drug resistance: antineoplastic	Nucleosides, nucleotides, and analogues	Pyrimidine nucleotides	Pyrimidine deoxyribonucleotides	60.3	-	Pyrimidine metabolism; Metabolic pathways; Antifolate resistance	Pyrimidine metabolism; Metabolic pathways; Antifolate resistance	2.9903	2.7771	0.7298	0.004342	0.0489	4.7664	3.3213	3.1013	4.7894	4.2716	4.5422	5.7947	5.2529	4.4372	5.9908	6.2217	6.2764
neg_7120	Orotic acid	metab_25286	yes	down	C00295	neg	65-86-1	155.009	0.751817	M-H	C5H4N2O4	64.6	-	HMDB0000226	-	-	map00240;map01100	Metabolism;Metabolism	Nucleotide metabolism;Global and overview maps	Organoheterocyclic compounds	Diazines	Pyrimidines and pyrimidine derivatives	64.6	-	Pyrimidine metabolism; Metabolic pathways	Pyrimidine metabolism; Metabolic pathways	1.5184	1.394	0.9037	0.03072	0.1382	4.2276	4.8321	3.8267	4.2916	4.4566	4.7632	4.999	5.0005	4.3355	5.0435	4.8949	4.9424
neg_7174	L-Arginine	metab_25338	yes	up	C00062	neg	74-79-3	173.104	0.722983	M-H	C6H14N4O2	69.3	-	HMDB0000517;HMDB0062762;MJDBOTE0000532	Peptides	Amino acids	map01100;map00220;map00997;map05014;map05146;map00472;map02010;map00330;map00331;map01230;map01110;map04974;map00970;map00261;map05142;map05230;map01064;map04150;map01060	Metabolism;Metabolism;Metabolism;Human Diseases;Human Diseases;Metabolism;Environmental Information Processing;Metabolism;Metabolism;Metabolism;Metabolism;Organismal Systems;Genetic Information Processing;Metabolism;Human Diseases;Human Diseases;Metabolism;Environmental Information Processing;Metabolism	Global and overview maps;Amino acid metabolism;Biosynthesis of other secondary metabolites;Neurodegenerative disease;Infectious disease: parasitic;Metabolism of other amino acids;Membrane transport;Amino acid metabolism;Biosynthesis of other secondary metabolites;Global and overview maps;Global and overview maps;Digestive system;Translation;Biosynthesis of other secondary metabolites;Infectious d…	Organic acids and derivatives	Carboxylic acids and derivatives	Amino acids, peptides, and analogues	69.3	-	Metabolic pathways; Arginine biosynthesis; Biosynthesis of various secondary metabolites - part 3; Amyotrophic lateral sclerosis (ALS); Amoebiasis; D-Arginine and D-ornithine metabolism; ABC transporters; Arginine and proline metabolism; Clavulanic acid biosynthesis; Biosynthesis of amino acids; Biosynthesis of secondary metabolites; Protein digestion and absorption; Aminoacyl-tRNA biosynthesis; …	Metabolic pathways; Arginine biosynthesis; Biosynthesis of various secondary metabolites - part 3; Amyotrophic lateral sclerosis (ALS); Amoebiasis; D-Arginine and D-ornithine metabolism; ABC transporters; Arginine and proline metabolism; Clavulanic acid biosynthesis; Biosynthesis of amino acids; Biosynthesis of secondary metabolites; Protein digestion and absorption; Aminoacyl-tRNA biosynthesis; …	1.312	1.2609	1.0798	0.03467	0.1467	4.9119	5.3859	5.2038	4.6109	5.233	5.1762	4.6775	4.8538	5.1214	4.3762	4.5902	4.6469
neg_7272	L-Glutamine	metab_25434	yes	down	C00064	neg	56-85-9	145.061	0.660967	M-H	C5H10N2O3	83.4	-	HMDB0000641;HMDB0003423	Peptides	Amino acids	map01100;map00630;map00220;map00230;map01120;map04964;map00471;map02010;map00910;map04978;map01230;map00240;map04974;map00250;map02020;map00970;map04727;map05230;map04724;map01060	Metabolism;Metabolism;Metabolism;Metabolism;Metabolism;Organismal Systems;Metabolism;Environmental Information Processing;Metabolism;Organismal Systems;Metabolism;Metabolism;Organismal Systems;Metabolism;Environmental Information Processing;Genetic Information Processing;Organismal Systems;Human Diseases;Organismal Systems;Metabolism	Global and overview maps;Carbohydrate metabolism;Amino acid metabolism;Nucleotide metabolism;Global and overview maps;Excretory system;Metabolism of other amino acids;Membrane transport;Energy metabolism;Digestive system;Global and overview maps;Nucleotide metabolism;Digestive system;Amino acid metabolism;Signal transduction;Translation;Nervous system;Cancer: overview;Nervous system;Chemical stru…	Organic acids and derivatives	Carboxylic acids and derivatives	Amino acids, peptides, and analogues	83.4	-	Metabolic pathways; Glyoxylate and dicarboxylate metabolism; Arginine biosynthesis; Purine metabolism; Microbial metabolism in diverse environments; Proximal tubule bicarbonate reclamation; D-Glutamine and D-glutamate metabolism; ABC transporters; Nitrogen metabolism; Mineral absorption; Biosynthesis of amino acids; Pyrimidine metabolism; Protein digestion and absorption; Alanine, aspartate and g…	Metabolic pathways; Glyoxylate and dicarboxylate metabolism; Arginine biosynthesis; Purine metabolism; Microbial metabolism in diverse environments; Proximal tubule bicarbonate reclamation; D-Glutamine and D-glutamate metabolism; ABC transporters; Nitrogen metabolism; Mineral absorption; Biosynthesis of amino acids; Pyrimidine metabolism; Protein digestion and absorption; Alanine, aspartate and g…	1.2261	1.1542	0.9531	0.00393	0.04648	5.2242	5.2665	5.4094	5.2639	5.4522	5.4595	5.4937	5.5885	5.5197	5.673	5.8536	5.5234
neg_7370	D,L-3,4-Dihydroxymandelic acid	metab_25528	yes	down	-	neg	-	165.019	0.623583	M-H2O-H	C8H8O5	58.6	-	-	-	-	-	-	-	-	-	-	58.6	-	-	-	1.4113	1.3516	0.9309	0.00255	0.03715	4.7065	4.4778	4.756	4.7803	4.522	4.5721	4.9166	4.9856	4.7835	5.1502	5.2042	4.8413
neg_7374	2-hydroxyflutamide	metab_25532	yes	down	C14204	neg	-	337.063	0.619117	M+FA-H	C11H11F3N2O4	-	57	HMDB0060949	-	-	-	-	-	Benzenoids	Benzene and substituted derivatives	Trifluoromethylbenzenes	-	57	-	-	2.8672	2.7067	0.7242	0.001467	0.02808	3.975	3.7305	2.475	2.6987	3.9164	3.9801	5.1517	4.761	4.3591	5.0184	4.5975	4.8054
neg_7375	DCMP	metab_25533	yes	down	C00239	neg	1032-65-1	306.05	0.619117	M-H	C9H14N3O7P	68.7	-	HMDB0001202	Nucleic acids	Nucleotides	map00240;map01100	Metabolism;Metabolism	Nucleotide metabolism;Global and overview maps	Nucleosides, nucleotides, and analogues	Pyrimidine nucleotides	Pyrimidine deoxyribonucleotides	68.7	-	Pyrimidine metabolism; Metabolic pathways	Pyrimidine metabolism; Metabolic pathways	2.4605	2.3119	0.7913	0.005456	0.05545	4.1768	3.9218	3.5389	4.5299	3.9292	4.2474	5.0071	4.7018	4.0762	5.5516	5.7956	5.6272
neg_7404	1-(sn-Glycero-3-phospho)-1D-myo-inositol	metab_25562	yes	up	C01225	neg	-	333.059	0.608683	M-H	C9H19O11P	-	52.4	HMDB0011649	-	-	-	-	-	Lipids and lipid-like molecules	Glycerophospholipids	Glycerophosphoinositols	-	52.4	-	-	1.2994	1.2049	1.0646	0.01002	0.07553	4.8685	5.165	4.992	5.1682	5.218	5.064	5.1554	4.6042	4.6514	4.7859	4.6983	4.7317
neg_7478	Methylphosphate	metab_25634	yes	down	-	neg	812-00-0	110.985	0.563467	M-H	CH5O4P	-	51	HMDB0061711	-	-	-	-	-	Organic acids and derivatives	Organic phosphoric acids and derivatives	Phosphate esters	-	51	-	-	2.0383	1.868	0.8318	0.01761	0.1027	3.9969	3.518	3.5925	3.4117	4.1405	4.6039	4.9679	4.3983	3.7916	4.9884	5.1356	4.6869
neg_7482	D-Myoinositol 4-phosphate	metab_25638	yes	down	C03546	neg	-	259.022	0.559783	M-H	C6H13O9P	66.3	-	HMDB0001313	-	-	map01100;map04070;map00562	Metabolism;Environmental Information Processing;Metabolism	Global and overview maps;Signal transduction;Carbohydrate metabolism	Organic oxygen compounds	Organooxygen compounds	Alcohols and polyols	66.3	-	Metabolic pathways; Phosphatidylinositol signaling system; Inositol phosphate metabolism	Metabolic pathways; Phosphatidylinositol signaling system; Inositol phosphate metabolism	3.2039	3.0231	0.7287	4.307e-05	0.005583	4.2149	3.9215	3.9827	4.2634	3.9538	3.9184	5.8748	5.7942	4.5857	6.0017	5.5971	5.4295
neg_7486	Glycerol 3-phosphate	metab_25642	yes	down	C00093	neg	1957-03-04	171.006	0.559783	M-H	C3H9O6P	64.2	-	HMDB0000126	-	-	map01100;map00564;map01110;map00561;map02010;map05231	Metabolism;Metabolism;Metabolism;Metabolism;Environmental Information Processing;Human Diseases	Global and overview maps;Lipid metabolism;Global and overview maps;Lipid metabolism;Membrane transport;Cancer: overview	Lipids and lipid-like molecules	Glycerophospholipids	Glycerophosphates	64.2	-	Metabolic pathways; Glycerophospholipid metabolism; Biosynthesis of secondary metabolites; Glycerolipid metabolism; ABC transporters; Choline metabolism in cancer	Metabolic pathways; Glycerophospholipid metabolism; Biosynthesis of secondary metabolites; Glycerolipid metabolism; ABC transporters; Choline metabolism in cancer	2.6034	2.4388	0.7434	0.00312	0.04199	3.2549	3.1436	3.3191	3.1185	3.339	3.6742	4.3515	4.3395	3.2885	5.2758	5.0493	4.3972
neg_81	L-Glutamate	metab_25712	yes	down	C00025	neg	-	146.045	0.598417	M-H2O-H, M-H	C5H9NO4	80	-	HMDB0000148;HMDB0003339;HMDB0060475	Peptides;Hormones and transmitters	Amino acids;Neurotransmitters	map00997;map01200;map00330;map00480;map00332;map04742;map00250;map05033;map04974;map04072;map04216;map00630;map00430;map04964;map00471;map02010;map00860;map04080;map05016;map05017;map05014;map04727;map01064;map04723;map05031;map04721;map01060;map01100;map00220;map04540;map01120;map01210;map00340;map00524;map01230;map04068;map05034;map01110;map00660;map04724;map05030;map00650;map00910;map02020;map…	Metabolism;Metabolism;Metabolism;Metabolism;Metabolism;Organismal Systems;Metabolism;Human Diseases;Organismal Systems;Environmental Information Processing;Cellular Processes;Metabolism;Metabolism;Organismal Systems;Metabolism;Environmental Information Processing;Metabolism;Environmental Information Processing;Human Diseases;Human Diseases;Human Diseases;Organismal Systems;Metabolism;Organismal S…	Biosynthesis of other secondary metabolites;Global and overview maps;Amino acid metabolism;Metabolism of other amino acids;Biosynthesis of other secondary metabolites;Sensory system;Amino acid metabolism;Substance dependence;Digestive system;Signal transduction;Cell growth and death;Carbohydrate metabolism;Metabolism of other amino acids;Excretory system;Metabolism of other amino acids;Membrane t…	Organic acids and derivatives	Carboxylic acids and derivatives	Amino acids, peptides, and analogues	80	-	Biosynthesis of various secondary metabolites - part 3; Carbon metabolism; Arginine and proline metabolism; Glutathione metabolism; Carbapenem biosynthesis; Taste transduction; Alanine, aspartate and glutamate metabolism; Nicotine addiction; Protein digestion and absorption; Phospholipase D signaling pathway; Ferroptosis; Glyoxylate and dicarboxylate metabolism; Taurine and hypotaurine metabolism…	Biosynthesis of various secondary metabolites - part 3; Carbon metabolism; Arginine and proline metabolism; Glutathione metabolism; Carbapenem biosynthesis; Taste transduction; Alanine, aspartate and glutamate metabolism; Nicotine addiction; Protein digestion and absorption; Phospholipase D signaling pathway; Ferroptosis; Glyoxylate and dicarboxylate metabolism; Taurine and hypotaurine metabolism…	1.6961	1.6245	0.9376	0.000196	0.01102	6.4488	6.5163	6.3294	6.1866	6.5505	6.566	6.9783	6.9694	6.7071	6.8843	6.7676	6.8586
neg_1297	Ne-Acetyllysine	metab_25715	yes	down	C02727	neg	-	187.108	3.23605	M-H	C8H16N2O3	74.3	-	HMDB0000197;HMDB0000206	-	-	map01100;map00310	Metabolism;Metabolism	Global and overview maps;Amino acid metabolism	Organoheterocyclic compounds	Indoles and derivatives	Indolyl carboxylic acids and derivatives	74.3	-	Metabolic pathways; Lysine degradation	Metabolic pathways; Lysine degradation	1.9535	1.8575	0.8797	0.003178	0.04267	4.8714	5.0845	4.7558	4.5499	4.7222	4.9398	5.4477	5.542	4.9954	5.8432	5.929	5.1205
neg_179	Panose	metab_25716	yes	down	C00713	neg	33401-87-5	503.162	0.755317	M-H2O-H, M-H	C18H32O16	62.5	-	HMDB0029937;HMDB0011729	-	-	-	-	-	Organic oxygen compounds	Organooxygen compounds	Carbohydrates and carbohydrate conjugates	62.5	-	-	-	1.0584	1.0188	0.9718	0.001648	0.02965	6.4995	6.4083	6.453	6.2407	6.3544	6.3619	6.5461	6.6611	6.58	6.4906	6.5811	6.5645
pos_36	Guanine	metab_35	yes	up	C00242	pos	73-40-5	152.057	1.12575	M+H, 2M+H, 2M+Na, M+Na, M+K	C5H5N5O	86.1	-	HMDB0000132;MJDBOTE0000457	Nucleic acids	Bases	map01100;map00230	Metabolism;Metabolism	Global and overview maps;Nucleotide metabolism	Organoheterocyclic compounds	Imidazopyrimidines	Purines and purine derivatives	86.1	-	Metabolic pathways; Purine metabolism	Metabolic pathways; Purine metabolism	1.2246	1.1664	1.0459	0.01117	0.06873	6.7238	6.6878	6.7596	6.7087	7.0069	6.967	6.7224	6.466	6.5703	6.4681	6.1814	6.6503
pos_123	(4E,8E,10E-d18:3)sphingosine	metab_122	yes	up	-	pos	-	296.258	6.73177	M+H, M+Na, M+K, M+H-H2O	C18H33NO2	62.5	-	LMSP01080013	-	-	-	-	-	-	-	-	62.5	-	-	-	1.0559	1.0142	1.0285	0.002184	0.02747	7.3049	7.511	7.5178	7.4946	7.5969	7.5784	7.2873	7.321	7.3125	7.2071	7.234	7.3979
pos_273	4-Pyridoxate	metab_272	yes	up	C00847	pos	-	166.05	2.67265	M+H-H2O, 2M+H, M+Na	C8H9NO4	82.3	-	HMDB0000017	-	-	map01100;map00750;map01120	Metabolism;Metabolism;Metabolism	Global and overview maps;Metabolism of cofactors and vitamins;Global and overview maps	Organoheterocyclic compounds	Pyridines and derivatives	Pyridinecarboxylic acids and derivatives	82.3	-	Metabolic pathways; Vitamin B6 metabolism; Microbial metabolism in diverse environments	Metabolic pathways; Vitamin B6 metabolism; Microbial metabolism in diverse environments	1.832	1.7374	1.1263	0.001597	0.02324	5.1488	5.0526	5.6187	5.2718	5.4182	5.4304	4.8147	4.331	4.5621	4.6376	4.9147	5.0938
pos_373	5-[(E)-3-hydroxy-3-methylbut-1-enyl]-2-methylcyclohex-5-ene-1,2,4-triol	metab_372	yes	up	-	pos	-	193.122	4.46125	M+H-2H2O, M+H, M+Na	C12H20O4	66.6	-	-	-	-	-	-	-	-	-	-	66.6	-	-	-	1.1346	1.0908	1.0609	0.03283	0.1299	5.7196	5.3079	5.6368	5.3656	5.1103	5.269	5.3708	4.8713	5.16	5.1013	4.8499	5.1975
pos_490	LysoPC(22:6(4Z,7Z,10Z,13Z,16Z,19Z))	metab_489	yes	down	C04230	pos	-	568.339	6.63412	M+H, M+Na, M+H-H2O	C30H50NO7P	-	88	HMDB0010404	Lipids	Phospholipids	map00564;map05231	Metabolism;Human Diseases	Lipid metabolism;Cancer: overview	Lipids and lipid-like molecules	Glycerophospholipids	Glycerophosphocholines	-	88	Glycerophospholipid metabolism; Choline metabolism in cancer	Glycerophospholipid metabolism; Choline metabolism in cancer	2.3906	2.2544	0.875	0.0004096	0.01103	6.7657	7.1667	6.7947	6.4577	6.4849	6.388	7.2636	7.5797	7.3128	7.9752	8.1003	7.5481
pos_513	3-ketosphingosine	metab_512	yes	up	C06121	pos	-	298.273	6.82185	M+H, M+ACN+H, M+Na	C18H35NO2	76.4	-	LMSP01010002	-	-	-	-	-	-	-	-	76.4	-	-	-	1.1229	1.0834	1.0328	0.0004437	0.01154	6.7946	6.9916	6.9496	6.9372	7.0012	6.9504	6.684	6.7376	6.7578	6.6453	6.6424	6.8346
pos_652	MJAW00088	metab_648	yes	down	-	pos	-	542.321	8.7393	M+H-H2O, M+Na, M+K	C26H50NO7P	80.4	-	;MJAW00088	-	-	-	-	-	-	-	-	80.4	-	-	-	1.1712	1.0802	0.9504	0.02044	0.09727	5.5545	5.5328	5.8248	5.1683	5.2503	5.3009	5.6693	5.6871	5.6884	5.8337	5.7687	5.6885
pos_655	LysoPE(18:2(9Z,12Z)/0:0)	metab_651	yes	down	-	pos	85046-18-0	495.308	8.73088	M+H-H2O, M+NH4, M+Na	C23H44NO7P	-	72.3	HMDB0011507	-	-	-	-	-	Lipids and lipid-like molecules	Glycerophospholipids	Glycerophosphoethanolamines	-	72.3	-	-	1.0619	1.0062	0.9579	0.03883	0.1433	6.3016	6.4851	5.8267	6.1375	6.166	5.9719	6.1304	6.3876	6.5144	6.5583	6.4659	6.454
pos_692	C-2 Ceramide	metab_688	yes	down	-	pos	-	306.279	6.91355	M+H, M+Na, M+H-2H2O	C20H39NO3	88.8	-	-	-	-	-	-	-	-	-	-	88.8	-	-	-	1.8044	1.7065	0.9139	0.0005844	0.01359	5.8679	6.0562	6.0239	5.9006	5.6841	5.7583	6.2559	6.6074	6.4485	6.6848	6.5516	6.0691
pos_694	Withanolide B	metab_690	yes	down	C00828	pos	56973-41-2	455.276	6.8967	M+H, M+Na, M+H-H2O	C28H38O5	-	67.2	HMDB0030020	Vitamins and Cofactors	Vitamins	map01100;map00130;map01110;map04977;map02020	Metabolism;Metabolism;Metabolism;Organismal Systems;Environmental Information Processing	Global and overview maps;Metabolism of cofactors and vitamins;Global and overview maps;Digestive system;Signal transduction	Lipids and lipid-like molecules	Prenol lipids	Quinone and hydroquinone lipids	-	67.2	Metabolic pathways; Ubiquinone and other terpenoid-quinone biosynthesis; Biosynthesis of secondary metabolites; Vitamin digestion and absorption; Two-component system	Metabolic pathways; Ubiquinone and other terpenoid-quinone biosynthesis; Biosynthesis of secondary metabolites; Vitamin digestion and absorption; Two-component system	2.4723	2.5281	0.7799	0.007153	0.05405	4.292	4.6389	4.6034	4.8633	4.4801	4.4351	6.3223	6.5108	6.9076	5.74	4.9308	4.6095
pos_741	2,4-Nonadien-1-ol	metab_737	yes	up	-	pos	62488-56-6	298.273	6.60128	M+H-H2O, 2M+NH4, 2M+H	C9H16O	-	54.3	LMFA05000608;HMDB0034845	-	-	-	-	-	Lipids and lipid-like molecules	Fatty Acyls	Fatty alcohols	-	54.3	-	-	1.1101	1.0582	1.0369	0.0001501	0.006246	5.5984	5.7515	5.7159	5.7099	5.8147	5.7594	5.5229	5.4779	5.5455	5.4704	5.5226	5.5876
pos_791	LysoPE(0:0/18:0)	metab_787	yes	up	-	pos	899443-67-5	482.326	6.44707	M+H, M+Na, M+H-H2O	C23H48NO7P	-	64.2	HMDB0011129	-	-	-	-	-	Lipids and lipid-like molecules	Glycerophospholipids	Glycerophosphoethanolamines	-	64.2	-	-	1.2674	1.2122	1.0637	0.02859	0.1195	6.2849	6.1541	6.1793	6.171	6.3884	6.3939	5.6256	5.6674	5.7843	5.7932	5.8928	6.5577
pos_803	P-Tolualdehyde	metab_799	yes	up	C06758	pos	104-87-0	121.065	6.40253	M+H, M+ACN+H, M+H-H2O	C8H8O	89.9	-	HMDB0029638	-	-	map01100;map01220;map00622;map01120	Metabolism;Metabolism;Metabolism;Metabolism	Global and overview maps;Global and overview maps;Xenobiotics biodegradation and metabolism;Global and overview maps	Benzenoids	Benzene and substituted derivatives	Benzoyl derivatives	89.9	-	Metabolic pathways; Degradation of aromatic compounds; Xylene degradation; Microbial metabolism in diverse environments	Metabolic pathways; Degradation of aromatic compounds; Xylene degradation; Microbial metabolism in diverse environments	1.0242	0.9927	1.035	0.003394	0.03568	5.9781	6.0705	6.064	5.9506	6.1154	6.0155	6.0411	5.8557	5.7915	5.7996	5.7789	5.7017
pos_1383	PC(4:0/0:0)	metab_1369	yes	down	-	pos	-	328.151	3.19155	M+H, M+Na	C12H26NO7P	51.8	-	LMGP01050061	-	-	-	-	-	-	-	-	51.8	-	-	-	2.8782	2.7289	0.7817	3.052e-05	0.002689	4.8378	5.2542	4.7746	4.3877	4.3794	4.3417	6.0343	6.0976	5.801	6.2557	6.0736	5.5254
pos_1459	1,5-dihydroxy-2,3-dimethoxy-10-methylacridin-9-one	metab_1445	yes	down	-	pos	-	334.128	3.57053	M+NH4, M+CH3OH+H	C16H15NO5	58.6	-	-	-	-	-	-	-	-	-	-	58.6	-	-	-	2.2033	2.1166	0.8313	0.001588	0.0232	5.003	4.3829	4.3751	4.6908	4.0068	3.7892	5.3509	5.4619	4.94	5.4318	5.4465	4.9468
pos_1727	Methyl 5-hydroxyoxindole-3-acetate	metab_1711	yes	up	-	pos	-	222.076	5.16098	M+H, M+Na	C11H11NO4	56.3	-	HMDB0038990	-	-	-	-	-	Organoheterocyclic compounds	Indoles and derivatives	Indolyl carboxylic acids and derivatives	56.3	-	-	-	1.6913	1.6719	1.1038	0.005133	0.04489	5.9264	6.101	6.2074	5.7606	6.1035	5.8122	5.5421	5.3178	5.9072	5.106	5.0033	5.6527
pos_1882	4-[formyl-(6-methoxyquinolin-8-yl)amino]pentanoic acid	metab_1865	yes	down	-	pos	-	303.133	6.05732	M+H, M+CH3OH+H	C16H18N2O4	56.6	-	-	-	-	-	-	-	-	-	-	56.6	-	-	-	1.4031	1.3728	0.941	0.001483	0.02223	5.9334	5.8355	5.7142	5.902	5.8647	5.8571	6.4311	6.404	6.0425	6.2856	5.9514	6.1956
pos_2043	3-(10-Heptadecenyl)phenol	metab_2025	yes	up	-	pos	111047-33-7	363.336	6.42107	M+H-H2O, M+CH3OH+H	C23H38O	-	59.9	HMDB0038525	-	-	-	-	-	Benzenoids	Phenols	1-hydroxy-4-unsubstituted benzenoids	-	59.9	-	-	1.1786	1.1306	1.0572	0.02017	0.09682	5.6179	5.8463	5.7067	5.9691	5.6162	5.3	5.2345	5.4623	5.5736	5.454	5.2574	5.2349
pos_2145	PE(18:1(9Z)/0:0)	metab_2121	yes	down	-	pos	-	480.308	6.8776	M+H, M+Na	C23H46NO7P	87.1	-	LMGP02050004	-	-	-	-	-	-	-	-	87.1	-	-	-	2.2113	2.1231	0.8908	1.438e-06	0.0003372	6.185	6.3401	5.998	6.0797	6.0752	6.1397	6.8107	6.8732	6.6714	6.9163	6.9904	7.0653
pos_2148	PI(16:0/18:1(11Z))	metab_2124	yes	up	-	pos	-	854.583	6.88292	M+NH4, M+Na	C43H81O13P	-	75.6	HMDB0009782	-	-	-	-	-	Lipids and lipid-like molecules	Glycerophospholipids	Glycerophosphoinositols	-	75.6	-	-	3.6089	3.6191	1.5583	8.231e-06	0.001101	6.9474	6.291	6.6733	5.5246	5.5578	5.5162	3.9668	3.9205	3.8863	3.8991	3.8728	3.8848
pos_2845	Linoelaidic Acid	metab_2775	yes	up	C01595	pos	506-21-8	281.247	7.29913	M+H-2H2O, M+H	C18H32O2	66.9	-	HMDB0006270;LMFA01030123;HMDB0000673	Lipids	Fatty acids	map01100;map00591;map01040;map01060	Metabolism;Metabolism;Metabolism;Metabolism	Global and overview maps;Lipid metabolism;Lipid metabolism;Chemical structure transformation maps	Lipids and lipid-like molecules	Fatty Acyls	Lineolic acids and derivatives	66.9	-	Metabolic pathways; Linoleic acid metabolism; Biosynthesis of unsaturated fatty acids; Biosynthesis of plant secondary metabolites	Metabolic pathways; Linoleic acid metabolism; Biosynthesis of unsaturated fatty acids; Biosynthesis of plant secondary metabolites	1.2428	1.1905	1.0565	0.0004445	0.01154	4.9443	4.9492	5.0727	5.0355	5.0671	4.9068	4.7699	4.8124	4.7336	4.5937	4.6122	4.8526
pos_2848	23S,25,26-Trihydroxyvitamin D3	metab_2778	yes	up	-	pos	-	397.309	7.29383	M+H-2H2O, M+NH4	C27H44O4	-	56.4	HMDB0060134	-	-	-	-	-	Lipids and lipid-like molecules	Steroids and steroid derivatives	Vitamin D and derivatives	-	56.4	-	-	1.2853	1.2695	1.0449	0.0001411	0.006049	6.6081	6.4917	6.5315	6.6145	6.5126	6.4637	6.1532	6.3009	6.3889	6.2387	6.3155	6.1391
pos_2899	C14-homoserine lactone	metab_2825	yes	up	-	pos	-	312.253	7.13598	M+H, M+Na	C18H33NO3	83	-	-	-	-	-	-	-	-	-	-	83	-	-	-	1.3689	1.2918	1.0766	0.01809	0.09076	5.2985	5.1566	5.1939	5.5489	5.4097	5.3563	5.0959	4.8903	5.1455	4.836	4.4439	5.2752
pos_3093	Strepin P1	metab_3015	yes	down	-	pos	-	546.352	6.78842	M+H-H2O, M+ACN+H	C25H40N6O5	71.4	-	-	-	-	-	-	-	-	-	-	71.4	-	-	-	1.039	0.9873	0.9621	0.03854	0.1428	6.509	6.4382	6.4357	6.4933	6.5568	7.0675	6.7362	6.8777	6.7907	6.9873	6.9461	6.7158
pos_3178	LysoPC(20:4(8Z,11Z,14Z,17Z))	metab_3099	yes	down	C04230	pos	-	566.321	6.6754	M+Na, M+K	C28H50NO7P	-	87.7	HMDB0010396	Lipids	Phospholipids	map00564;map05231	Metabolism;Human Diseases	Lipid metabolism;Cancer: overview	Lipids and lipid-like molecules	Glycerophospholipids	Glycerophosphocholines	-	87.7	Glycerophospholipid metabolism; Choline metabolism in cancer	Glycerophospholipid metabolism; Choline metabolism in cancer	3.4792	3.2404	0.7031	0.0008762	0.01683	5.1622	5.8238	5.2415	2.909	4.8613	4.6613	6.4179	6.9274	6.4217	6.9408	7.3386	6.7187
pos_3317	PC(20:5(5Z,8Z,11Z,14Z,17Z)/0:0)	metab_3231	yes	down	-	pos	-	542.323	6.52058	M+H, M+Na	C28H48NO7P	50.9	-	LMGP01050050	-	-	-	-	-	-	-	-	50.9	-	-	-	2.6044	2.453	0.8422	0.000147	0.006211	5.9764	6.3222	5.8876	5.54	5.6625	5.6333	6.5528	6.9336	6.553	7.2586	7.3922	6.8966
pos_3340	Harderoporphyrinogen	metab_3254	yes	up	-	pos	42607-18-1	615.314	6.45857	M+H-H2O, M+H	C35H42N4O6	-	53.6	HMDB0002160	-	-	-	-	-	Organoheterocyclic compounds	Tetrapyrroles and derivatives	Porphyrins	-	53.6	-	-	2.5116	2.4682	1.2794	0.001652	0.0235	6.2318	5.2613	5.042	5.5529	5.8317	4.9909	4.4288	5.1308	4.2514	3.8198	3.7918	4.2969
pos_3442	(3beta,17alpha,23S)-17,23-Epoxy-3,29-dihydroxy-27-norlanosta-7,9(11)-diene-15,24-dione	metab_3355	yes	up	-	pos	-	512.337	6.36672	M+Na, M+ACN+H	C29H42O5	-	86.5	HMDB0035970	-	-	-	-	-	Lipids and lipid-like molecules	Steroids and steroid derivatives	Oxosteroids	-	86.5	-	-	1.4066	1.3492	1.0818	0.02459	0.1091	5.9696	5.9641	5.9728	5.8524	5.8881	5.8947	5.7325	5.5048	5.6569	5.7756	4.6667	5.5208
pos_3500	N-[[3-Hydroxy-2-(2-pentenyl)cyclopentyl]acetyl]isoleucine	metab_3412	yes	up	-	pos	162854-97-9	326.232	6.27827	M+H, M+Na	C18H31NO4	82.3	-	HMDB0041248	-	-	-	-	-	Organic acids and derivatives	Carboxylic acids and derivatives	Amino acids, peptides, and analogues	82.3	-	-	-	1.0627	1.0483	1.0585	0.04109	0.1483	5.3215	5.3335	5.7267	5.3001	5.2375	5.3164	5.349	5.2188	4.8273	5.1082	4.7079	5.2477
pos_3607	Peiminine	metab_3519	yes	up	C10808	pos	-	430.33	6.12668	M+H-H2O, M+H	C27H43NO3	52.7	-	;MJDBOTE0001241	-	-	-	-	-	-	-	-	52.7	-	-	-	1.9019	1.8862	1.1039	3.451e-05	0.002867	6.2537	6.1212	6.3517	6.3504	6.465	6.5261	5.8216	5.8894	5.4677	5.7342	5.8096	5.767
pos_3699	DL-o-Tyrosine	metab_3609	yes	down	-	pos	-	164.07	5.81745	M+H-H2O, M+H	C9H11NO3	81.9	-	HMDB0006050	-	-	-	-	-	Organic acids and derivatives	Carboxylic acids and derivatives	Amino acids, peptides, and analogues	81.9	-	-	-	1.0442	1.0698	0.9532	0.01452	0.07955	5.6296	5.0881	5.3953	5.631	5.5428	5.5682	5.7986	5.7066	5.6947	5.8586	5.7734	5.638
pos_3818	D-Pantethine	metab_3727	yes	down	C12661	pos	16816-67-4	555.251	4.74078	M+H, M+Na	C22H42N4O8S2	88.8	-	HMDB0003828	-	-	-	-	-	Organic acids and derivatives	Carboxylic acids and derivatives	Amino acids, peptides, and analogues	88.8	-	-	-	2.7513	2.5747	0.7424	0.01497	0.08103	5.4616	5.6991	4.3273	5.3989	2.7173	3.4453	6.0757	6.6109	6.2237	6.4561	5.5672	5.5001
pos_3872	Riboflavin (Vitamin B2)	metab_3781	yes	up	-	pos	-	377.145	4.33967	M+H, M+Na	C17H20N4O6	66	-	-	-	-	-	-	-	-	-	-	66	-	-	-	1.3896	1.3313	1.0628	0.001995	0.02629	5.9805	6.1466	6.0223	6.0059	6.0727	6.0366	5.8687	5.7009	5.8972	5.7651	5.3992	5.4884
pos_4112	4,6-dihydroxy-3-methyl-2,3-dihydroisoindol-1-one	metab_4019	yes	up	-	pos	-	162.055	2.86117	M+H-H2O, M+H	C9H9NO3	64.4	-	-	-	-	-	-	-	-	-	-	64.4	-	-	-	1.8328	1.734	1.1007	0.0008326	0.01646	6.0975	6.2116	6.6174	6.4932	6.4157	6.2172	5.8566	5.6154	5.8865	5.3782	5.821	6.0126
pos_4144	4-Pyridoxic acid	metab_4051	yes	up	C00847	pos	82-82-6	184.06	2.67265	M+H-2H2O, M+H	C8H9NO4	97.6	-	HMDB0000017	-	-	map01100;map00750;map01120	Metabolism;Metabolism;Metabolism	Global and overview maps;Metabolism of cofactors and vitamins;Global and overview maps	Organoheterocyclic compounds	Pyridines and derivatives	Pyridinecarboxylic acids and derivatives	97.6	-	Metabolic pathways; Vitamin B6 metabolism; Microbial metabolism in diverse environments	Metabolic pathways; Vitamin B6 metabolism; Microbial metabolism in diverse environments	1.4536	1.3825	1.0671	0.002071	0.02666	6.0102	6.0667	6.1527	6.0185	6.1253	6.1524	5.9432	5.4208	5.4931	5.8065	5.6537	5.9111
pos_4173	4-Methylene-L-glutamine	metab_4079	yes	down	C01109	pos	-	176.103	0.700983	M+H, M+NH4	C6H10N2O3	70.2	-	-	-	-	map00660	Metabolism	Carbohydrate metabolism	-	-	-	70.2	-	C5-Branched dibasic acid metabolism	C5-Branched dibasic acid metabolism	1.1578	1.127	0.9646	0.001948	0.02589	6.8026	6.7706	6.7306	6.8724	6.9569	7.0168	6.987	7.2557	7.1556	7.0361	7.153	7.0704
pos_4448	Uracil	metab_4351	yes	down	C00106	pos	66-22-8	113.035	1.14002	M+H-H2O, M+H	C4H4N2O2	86.9	-	HMDB0000300	Nucleic acids	Bases	map00240;map01100;map00770;map00410	Metabolism;Metabolism;Metabolism;Metabolism	Nucleotide metabolism;Global and overview maps;Metabolism of cofactors and vitamins;Metabolism of other amino acids	Organoheterocyclic compounds	Diazines	Pyrimidines and pyrimidine derivatives	86.9	-	Pyrimidine metabolism; Metabolic pathways; Pantothenate and CoA biosynthesis; beta-Alanine metabolism	Pyrimidine metabolism; Metabolic pathways; Pantothenate and CoA biosynthesis; beta-Alanine metabolism	1.2323	1.2096	0.9557	0.0009411	0.01724	6.1704	5.9764	5.9542	6.1569	6.2319	6.2933	6.4034	6.4334	6.3245	6.4403	6.5087	6.3788
pos_4542	N-lactoyl-Leucine	metab_4445	yes	down	-	pos	-	242.078	1.12172	M+CH3OH+H, M+K	C9H17NO4	-	63.1	HMDB0062176	-	-	-	-	-	Organic acids and derivatives	Carboxylic acids and derivatives	Amino acids, peptides, and analogues	-	63.1	-	-	1.8616	1.7751	0.8471	0.009641	0.06329	4.0622	4.0488	4.1594	3.8886	3.7268	3.5429	4.2904	4.4294	4.2818	4.2	5.1411	5.3164
pos_4545	Cis-2,3-Dimethylthiirane	metab_4448	yes	down	-	pos	5954-71-2	89.0424	1.30058	M+H, M+NH4	C4H8S	56.4	-	HMDB0039807	-	-	-	-	-	Organoheterocyclic compounds	Thiiranes	Not Available	56.4	-	-	-	2.3108	2.3025	0.7201	0.03006	0.1234	3.0083	4.0891	2.8792	3.0704	2.9821	2.9847	4.5052	4.1224	3.1801	5.7892	5.5434	3.2657
pos_4581	Xanthine	metab_4484	yes	down	C00385	pos	69-89-6	153.041	1.43585	M+H, M+Na	C5H4N4O2	79.9	-	HMDB0000292	-	-	map01100;map01110;map00230;map01120;map00232;map01065;map01060	Metabolism;Metabolism;Metabolism;Metabolism;Metabolism;Metabolism;Metabolism	Global and overview maps;Global and overview maps;Nucleotide metabolism;Global and overview maps;Biosynthesis of other secondary metabolites;Chemical structure transformation maps;Chemical structure transformation maps	Organoheterocyclic compounds	Imidazopyrimidines	Purines and purine derivatives	79.9	-	Metabolic pathways; Biosynthesis of secondary metabolites; Purine metabolism; Microbial metabolism in diverse environments; Caffeine metabolism; Biosynthesis of alkaloids derived from histidine and purine; Biosynthesis of plant secondary metabolites	Metabolic pathways; Biosynthesis of secondary metabolites; Purine metabolism; Microbial metabolism in diverse environments; Caffeine metabolism; Biosynthesis of alkaloids derived from histidine and purine; Biosynthesis of plant secondary metabolites	1.4992	1.4378	0.9418	0.0006344	0.01439	6.399	6.3154	6.1557	6.2175	6.4918	6.6464	6.726	6.788	6.6646	6.777	6.8973	6.7365
pos_4778	1,4,5,8-TETRAHYDROXY-2,6-DIMETHYLANTHROQUINONE	metab_4677	yes	down	-	pos	-	301.073	0.58285	M+H	C16H12O6	74.5	-	-	-	-	-	-	-	-	-	-	74.5	-	-	-	1.4364	1.356	0.9308	0.001569	0.02304	4.8289	5.0831	4.8096	4.9688	4.9904	4.9603	5.086	5.5372	5.3203	5.32	5.463	5.1124
pos_4897	L-Saccharopine	metab_4789	yes	down	C00449	pos	-	309.165	0.671517	M+CH3OH+H	C11H20N2O6	51.5	-	HMDB0000279	-	-	map01100;map00310;map01110;map00300;map01230	Metabolism;Metabolism;Metabolism;Metabolism;Metabolism	Global and overview maps;Amino acid metabolism;Global and overview maps;Amino acid metabolism;Global and overview maps	Organic acids and derivatives	Carboxylic acids and derivatives	Amino acids, peptides, and analogues	51.5	-	Metabolic pathways; Lysine degradation; Biosynthesis of secondary metabolites; Lysine biosynthesis; Biosynthesis of amino acids	Metabolic pathways; Lysine degradation; Biosynthesis of secondary metabolites; Lysine biosynthesis; Biosynthesis of amino acids	1.1782	1.088	0.949	0.01209	0.07212	4.9784	5.3466	5.2062	5.0227	4.9487	4.8765	5.135	5.4133	5.3591	5.261	5.4987	5.3412
pos_4925	L-Azetidine 2-carboxylic acid	metab_4810	yes	down	C08267	pos	-	102.055	0.688	M+H	C4H7NO2	84.6	-	HMDB0029615	-	-	-	-	-	Organic acids and derivatives	Carboxylic acids and derivatives	Amino acids, peptides, and analogues	84.6	-	-	-	1.1927	1.1632	0.9576	0.000698	0.01488	5.6842	5.7021	5.6108	5.6077	5.8472	5.8522	6.0374	6.0491	5.8714	5.9648	5.924	5.9744
pos_5053	Alanyl-Proline	metab_4920	yes	down	-	pos	-	187.108	0.807267	M+H	C8H14N2O3	53.9	-	HMDB0028695	-	-	-	-	-	Organic acids and derivatives	Carboxylic acids and derivatives	Amino acids, peptides, and analogues	53.9	-	-	-	1.5608	1.5122	0.9302	0.0005441	0.0131	5.7803	5.6898	5.5886	5.7502	5.8372	5.9814	6.1314	6.1792	5.9927	6.368	6.4307	6.1192
pos_5257	5-Hydroxymethylcytidine	metab_5114	yes	down	-	pos	-	256.092	1.12903	M+H-H2O	C10H15N3O6	63.5	-	-	-	-	-	-	-	-	-	-	63.5	-	-	-	1.0265	1.0583	0.9466	0.03035	0.1241	4.9249	4.6859	4.842	5.1535	5.0346	5.0413	5.3242	5.2649	4.8788	5.5267	5.2185	5.1439
pos_5614	Phenylacetaldehyde	metab_5455	yes	down	C00601	pos	122-78-1	121.065	2.02118	M+H	C8H8O	86.1	-	HMDB0006236;HMDB0041610	-	-	map01100;map00360;map01120;map00643	Metabolism;Metabolism;Metabolism;Metabolism	Global and overview maps;Amino acid metabolism;Global and overview maps;Xenobiotics biodegradation and metabolism	Benzenoids	Benzene and substituted derivatives	Phenylacetaldehydes	86.1	-	Metabolic pathways; Phenylalanine metabolism; Microbial metabolism in diverse environments; Styrene degradation	Metabolic pathways; Phenylalanine metabolism; Microbial metabolism in diverse environments; Styrene degradation	1.625	1.6329	0.8965	0.02212	0.1022	5.0642	5.4897	5.1654	5.4516	5.0826	5.1439	5.7302	5.5806	5.3747	6.2605	6.6578	5.4184
pos_5908	Hypoxanthine	metab_5721	yes	down	C00262	pos	68-94-0	137.046	2.7357	M+H	C5H4N4O	94.2	-	HMDB0000157	-	-	map01100;map00230	Metabolism;Metabolism	Global and overview maps;Nucleotide metabolism	Organoheterocyclic compounds	Imidazopyrimidines	Purines and purine derivatives	94.2	-	Metabolic pathways; Purine metabolism	Metabolic pathways; Purine metabolism	1.1677	1.113	0.9665	0.002417	0.02907	7.3183	7.3652	6.9971	7.1692	7.161	7.1005	7.3943	7.4359	7.4404	7.3326	7.4865	7.5129
pos_6099	2-Deoxyribose	metab_5905	yes	up	C01801	pos	533-67-5	176.092	3.07345	M+ACN+H	C5H10O4	69.4	-	HMDB0003224	Carbohydrates	Monosaccharides	map01100;map00030	Metabolism;Metabolism	Global and overview maps;Carbohydrate metabolism	Organic oxygen compounds	Organooxygen compounds	Carbohydrates and carbohydrate conjugates	69.4	-	Metabolic pathways; Pentose phosphate pathway	Metabolic pathways; Pentose phosphate pathway	1.6195	1.6374	1.1849	0.04464	0.1559	4.3607	5.9473	4.4317	4.1266	4.5555	4.1429	4.03	3.5607	4.162	3.6486	3.5242	4.3371
pos_6125	MJAW00014	metab_5931	yes	down	-	pos	-	243.134	3.11567	M+H-H2O	C11H20N2O5	54.8	-	;MJAW00014	-	-	-	-	-	-	-	-	54.8	-	-	-	1.3491	1.2572	0.9392	0.006591	0.05171	5.2944	5.5184	5.2751	5.0882	5.0964	5.1511	5.5803	5.5947	5.2695	5.7824	5.7171	5.51
pos_6258	Val-Val-Val	metab_6060	yes	down	-	pos	-	357.249	3.33568	M+ACN+H	C15H29N3O4	-	73.6	HMDB0094676	-	-	-	-	-	Organic acids and derivatives	Carboxylic acids and derivatives	Amino acids, peptides, and analogues	-	73.6	-	-	1.0969	1.0879	0.9619	0.003302	0.03509	6.1784	6.1087	6.1137	6.3331	6.1692	6.0167	6.3525	6.4957	6.3249	6.5497	6.422	6.2383
pos_6854	2-[(2-hydroxy-3-methylbutanoyl)amino]-4-methylpentanoic acid	metab_6643	yes	up	-	pos	-	480.331	4.32373	2M+NH4	C11H21NO4	69.4	-	-	-	-	-	-	-	-	-	-	69.4	-	-	-	5.5022	5.4145	3.632	4.681e-13	1.458e-09	6.2787	6.2918	6.1967	6.4496	6.3554	6.3259	1.675	1.6641	1.6307	1.6432	2.1944	1.6293
pos_6890	(2S,3R)-2-aminooctadecane-1,3-diol	metab_6677	yes	up	C00836	pos	764-22-7	340.259	4.40478	M+K	C18H39NO2	72.2	-	HMDB0000269	-	-	map00600;map01100;map04071	Metabolism;Metabolism;Environmental Information Processing	Lipid metabolism;Global and overview maps;Signal transduction	Organic nitrogen compounds	Organonitrogen compounds	Amines	72.2	-	Sphingolipid metabolism; Metabolic pathways; Sphingolipid signaling pathway	Sphingolipid metabolism; Metabolic pathways; Sphingolipid signaling pathway	1.9228	1.9387	1.1307	0.0003416	0.01001	5.408	5.3574	5.396	5.5524	5.7408	5.4599	4.7965	4.7753	4.6062	4.88	5.3391	4.7148
pos_6977	N6-(Delta2-Isopentenyl)-Adenine	metab_6763	yes	down	C04083	pos	-	204.124	4.58758	M+H	C10H13N5	65.2	-	-	-	-	map01110;map04075;map00908	Metabolism;Environmental Information Processing;Metabolism	Global and overview maps;Signal transduction;Metabolism of terpenoids and polyketides	-	-	-	65.2	-	Biosynthesis of secondary metabolites; Plant hormone signal transduction; Zeatin biosynthesis	Biosynthesis of secondary metabolites; Plant hormone signal transduction; Zeatin biosynthesis	1.0384	0.9838	0.952	0.03842	0.1425	5.1455	5.0714	4.8719	4.8931	5.2461	5.3762	5.5496	5.4474	5.203	5.3997	5.4585	5.0879
pos_7079	2-Ethyl-5-imino-1-cyclopenten-1-ol	metab_6863	yes	up	-	pos	90554-84-0	126.091	4.79855	M+H	C7H11NO	53.6	-	HMDB0039583	-	-	-	-	-	Organic nitrogen compounds	Organonitrogen compounds	Imines	53.6	-	-	-	1.308	1.333	1.1004	0.03784	0.1415	4.6809	5.3214	5.0077	4.488	4.8605	4.5062	4.3181	4.2467	4.9807	4.1777	4.1112	4.3956
pos_7469	3-Acetyl-5-sec-butyl-4-hydroxy-1,5-dihydro-2H-pyrrol-2-one	metab_7250	yes	up	-	pos	-	198.112	5.63152	M+H	C10H15NO3	76.3	-	-	-	-	-	-	-	-	-	-	76.3	-	-	-	1.1256	1.122	1.0562	0.02665	0.1143	5.5902	5.605	5.6777	5.447	5.5692	5.4665	5.2692	5.2933	5.7379	5.1809	4.9321	5.1637
pos_7787	3-Hexaprenyl-4,5-Dihydroxybenzoic acid	metab_7560	yes	up	C05200	pos	63975-40-6	626.422	6.07837	M+ACN+Na	C37H54O4	-	51.1	HMDB0001063;LMPR02010043	-	-	map00130;map01110	Metabolism;Metabolism	Metabolism of cofactors and vitamins;Global and overview maps	Lipids and lipid-like molecules	Prenol lipids	Polyprenylphenols	-	51.1	Ubiquinone and other terpenoid-quinone biosynthesis; Biosynthesis of secondary metabolites	Ubiquinone and other terpenoid-quinone biosynthesis; Biosynthesis of secondary metabolites	1.2362	1.1604	1.0629	0.01212	0.07213	5.0653	5.2068	5.2498	5.15	5.3016	5.1627	4.8288	4.5449	5.1691	4.7091	5.0427	4.9999
pos_7871	Peimine	metab_7636	yes	down	C10830	pos	-	449.373	6.14607	M+NH4	C27H45NO3	71.9	-	;MJDBOTE0001278	-	-	-	-	-	-	-	-	71.9	-	-	-	2.3752	2.3054	0.783	0.005167	0.04505	3.681	4.9017	3.7267	4.65	3.6914	3.7714	5.017	5.4546	5.7911	5.6163	5.0177	4.2923
pos_7925	MJAW00140	metab_7685	yes	up	-	pos	-	504.331	6.1896	M+H-H2O	C29H47NO7	85.4	-	;MJAW00140	-	-	-	-	-	-	-	-	85.4	-	-	-	3.2981	3.2593	1.3603	1.415e-08	7.62e-06	6.3201	6.2932	6.0324	6.5354	6.2907	6.2945	4.785	4.8262	4.3964	4.761	4.5659	4.4259
pos_7973	Lauric isopropanolamide	metab_7731	yes	up	-	pos	-	290.268	6.23018	M+CH3OH+H	C15H31NO2	63.5	-	-	-	-	-	-	-	-	-	-	63.5	-	-	-	1.2606	1.2314	1.0624	0.02021	0.097	5.4585	5.7894	5.6436	5.5568	6.0379	5.6143	5.569	5.2546	5.535	5.1638	5.0648	5.5061
pos_8195	DL-Palmitoylcarnitine	metab_7935	yes	up	-	pos	-	400.341	6.40253	M+H	C23H45NO4	65.9	-	-	-	-	-	-	-	-	-	-	65.9	-	-	-	1.2208	1.2193	1.0433	0.001457	0.02209	6.5714	6.6674	6.6748	6.5895	6.6926	6.5579	6.3345	6.2651	6.4071	6.3836	6.5699	6.1438
pos_8385	Phosphocholine	metab_8099	yes	down	C00588	pos	-	184.073	6.64	M+H	C5H14NO4P	83.4	-	HMDB0001565	-	-	map01100;map00564;map05231	Metabolism;Metabolism;Human Diseases	Global and overview maps;Lipid metabolism;Cancer: overview	Organic nitrogen compounds	Organonitrogen compounds	Quaternary ammonium salts	83.4	-	Metabolic pathways; Glycerophospholipid metabolism; Choline metabolism in cancer	Metabolic pathways; Glycerophospholipid metabolism; Choline metabolism in cancer	1.804	1.7514	0.8878	0.007253	0.05446	4.9994	5.0222	5.119	4.9379	4.9257	5.193	5.3604	5.6812	5.1685	6.0424	6.353	5.4085
pos_8418	Tobramycin, N-propionyl derivative likely	metab_8129	yes	down	-	pos	-	488.274	6.67883	M+H-2H2O	C21H41N5O10	50.3	-	-	-	-	-	-	-	-	-	-	50.3	-	-	-	1.9075	1.8134	0.8837	0.001643	0.02344	4.815	5.4997	4.8223	4.7016	4.8152	4.7891	5.5495	5.388	5.2569	5.5289	5.697	5.8992
pos_8558	Heptadecanoic acid	metab_8256	yes	down	-	pos	506-12-7	312.289	6.84463	M+ACN+H	C17H34O2	54.1	-	HMDB0006210;HMDB0002259;HMDB0006497;LMFA01010017	-	-	-	-	-	Lipids and lipid-like molecules	Fatty Acyls	Fatty acid esters	54.1	-	-	-	1.7301	1.6235	0.8804	0.01248	0.07339	4.1865	4.7158	4.5493	4.2613	4.1133	4.2272	4.4265	5.1225	4.7817	5.2384	5.4767	4.5483
pos_8559	PE(MonoMe(11,3)/MonoMe(11,5))	metab_8257	yes	up	-	pos	-	824.536	6.84463	M+H	C45H78NO10P	-	65.7	HMDB0061522	-	-	-	-	-	Lipids and lipid-like molecules	Glycerophospholipids	Glycerophosphoethanolamines	-	65.7	-	-	2.8991	2.9871	1.428	0.001328	0.02085	7.062	6.0507	6.1385	4.8106	4.7991	4.8904	3.9721	3.9609	3.9267	3.9396	3.9116	3.9253
pos_8568	Rakicidin	metab_8265	yes	up	-	pos	-	648.43	6.8568	M+ACN+H	C32H54N4O7	70.2	-	-	-	-	-	-	-	-	-	-	70.2	-	-	-	2.2396	2.2791	1.188	0.002212	0.02763	7.3755	6.8003	6.9389	5.972	6.0067	5.968	5.4811	5.4727	5.5767	5.4368	5.3037	5.6082
pos_8607	Phosphatidylethanolamine (20:1/16:1) Abbr	metab_8301	yes	up	-	pos	-	766.53	6.8967	M+Na	C41H78NO8P	75.2	-	-	-	-	-	-	-	-	-	-	75.2	-	-	-	2.7426	2.8073	1.3083	0.0002325	0.008145	6.7467	6.0568	6.4685	5.3493	5.4217	5.528	4.3699	4.6946	4.6377	4.3374	4.7186	4.4305
pos_8851	Pubesenolide	metab_8520	yes	down	-	pos	98569-64-3	481.292	7.15362	M+Na	C28H42O5	-	72.1	HMDB0033728	-	-	-	-	-	Lipids and lipid-like molecules	Prenol lipids	Triterpenoids	-	72.1	-	-	2.279	2.2738	0.7834	0.01872	0.09299	4.5591	3.8384	3.0963	5.3987	4.0299	4.9273	5.5708	5.916	4.3629	5.9301	6.016	5.1982
pos_9047	(9Z,12Z,15Z)-octadeca-9,12,15-trienoic acid	metab_8690	yes	up	C06427	pos	463-40-1	296.258	7.37882	M+NH4	C18H30O2	76.8	-	HMDB0001388;MJDBWX000002419	Lipids	Fatty acids	map01100;map01110;map00592;map01040;map01070;map01060	Metabolism;Metabolism;Metabolism;Metabolism;Metabolism;Metabolism	Global and overview maps;Global and overview maps;Lipid metabolism;Lipid metabolism;Chemical structure transformation maps;Chemical structure transformation maps	Lipids and lipid-like molecules	Fatty Acyls	Lineolic acids and derivatives	76.8	-	Metabolic pathways; Biosynthesis of secondary metabolites; alpha-Linolenic acid metabolism; Biosynthesis of unsaturated fatty acids; Biosynthesis of plant hormones; Biosynthesis of plant secondary metabolites	Metabolic pathways; Biosynthesis of secondary metabolites; alpha-Linolenic acid metabolism; Biosynthesis of unsaturated fatty acids; Biosynthesis of plant hormones; Biosynthesis of plant secondary metabolites	1.5493	1.5156	1.1456	0.008435	0.05898	3.6885	3.9674	3.567	4.0241	4.126	4.0387	2.9425	3.4028	3.6879	3.277	3.7687	3.3553
pos_9364	Cholic Acid, Methyl Ester	metab_8975	yes	down	-	pos	-	467.275	7.82417	M+2Na-H	C25H42O5	61.8	-	-	-	-	-	-	-	-	-	-	61.8	-	-	-	3.5048	3.5063	0.2476	0.0135	0.07643	1.8068	1.5789	0.2649	0.2819	0.8614	0.2574	4.7604	5.2389	5.3414	0.7373	2.5416	1.781
pos_11395	2-Pentadecylfuran	metab_10745	yes	up	-	pos	59958-20-2	296.294	7.45948	M+NH4	C19H34O	-	78	HMDB0033609	-	-	-	-	-	Organoheterocyclic compounds	Heteroaromatic compounds	Not Available	-	78	-	-	1.0716	1.0687	1.0418	0.0004415	0.01154	5.2189	5.324	5.4809	5.2593	5.2746	5.3105	5.0749	5.1517	5.054	5.0607	5.0937	5.1556
pos_11713	Larixol Acetate	metab_11027	yes	up	-	pos	-	349.273	7.27305	M+H	C22H36O3	80	-	-	-	-	-	-	-	-	-	-	80	-	-	-	1.3065	1.2342	1.0809	0.0268	0.1145	4.7044	5.1175	5.0209	5.1788	5.3557	5.2517	5.0611	4.6654	4.8206	4.2434	4.8994	4.6455
pos_11820	N,N-Diethyl-3,4-dimethoxybenzamide	metab_11115	yes	down	-	pos	-	516.305	7.19003	2M+ACN+H	C13H19NO3	62.5	-	-	-	-	-	-	-	-	-	-	62.5	-	-	-	1.9064	1.8356	0.8719	0.007296	0.05464	5.02	5.3332	4.3451	4.2831	4.9421	4.9142	5.7827	5.4007	5.2516	5.1324	5.5606	5.9455
pos_12039	Methyl palmitoleate	metab_11307	yes	down	-	pos	-	310.273	7.08265	M+ACN+H	C17H32O2	76.5	-	-	-	-	-	-	-	-	-	-	76.5	-	-	-	1.4952	1.5356	0.8732	0.04742	0.1615	4.6157	3.3382	4.0272	4.7921	4.5201	4.9099	5.186	5.1092	4.3906	5.4033	5.1021	4.8144
pos_12272	Iso-Roridine	metab_11514	yes	down	-	pos	-	537.249	6.951	M+Na	C29H38O8	68	-	-	-	-	-	-	-	-	-	-	68	-	-	-	2.5936	2.4872	0.7633	0.001128	0.01911	4.3367	4.4074	3.9317	3.6131	3.5964	3.5602	4.8232	4.3767	4.8084	5.7074	5.6694	5.3357
pos_12356	(Z)-N-(2-hydroxyethyl)octadec-9-enamide	metab_11593	yes	up	-	pos	-	348.289	6.90103	M+Na	C20H39NO2	57.5	-	-	-	-	-	-	-	-	-	-	57.5	-	-	-	1.0992	1.0496	1.0442	0.004156	0.03965	5.1921	5.3525	5.3961	5.4901	5.3624	5.2614	5.1557	5.032	5.1347	5.011	5.3035	5.0598
pos_12419	Carmaphycin B enone analogue	metab_11652	yes	down	-	pos	-	516.305	6.87278	M+H	C25H45N3O6S	73.2	-	-	-	-	-	-	-	-	-	-	73.2	-	-	-	3.0015	2.8606	0.709	0.001006	0.0181	4.4105	3.676	3.7656	3.2129	4.0762	4.0732	5.5686	5.4427	4.0539	5.7878	6.245	5.6468
pos_12483	2-benzyl-1-methyl-5-nonylpyrrolidin-3-ol	metab_11713	yes	up	-	pos	-	381.289	6.84463	M+ACN+Na	C21H35NO	73.8	-	-	-	-	-	-	-	-	-	-	73.8	-	-	-	1.0581	0.9908	1.0351	0.001638	0.02344	5.7272	5.73	5.713	5.8872	5.7652	5.7188	5.5989	5.5741	5.6797	5.5244	5.4097	5.5852
pos_12640	Cholesterol	metab_11858	yes	down	C00187	pos	57-88-5	409.342	6.76585	M+Na	C27H46O	73.9	-	HMDB0000067;LMST01010001	Steroids	27-Carbon atoms	map01100;map00984;map01120;map00981;map04979;map04913;map04976;map00120;map04975;map04977;map04925;map04927;map00100;map01066;map04934;map00140;map05217;map05200	Metabolism;Metabolism;Metabolism;Metabolism;Organismal Systems;Organismal Systems;Organismal Systems;Metabolism;Organismal Systems;Organismal Systems;Organismal Systems;Organismal Systems;Metabolism;Metabolism;Human Diseases;Metabolism;Human Diseases;Human Diseases	Global and overview maps;Xenobiotics biodegradation and metabolism;Global and overview maps;Metabolism of terpenoids and polyketides;Digestive system;Endocrine system;Digestive system;Lipid metabolism;Digestive system;Digestive system;Endocrine system;Endocrine system;Lipid metabolism;Chemical structure transformation maps;Endocrine and metabolic disease;Lipid metabolism;Cancer: specific types;Ca…	Lipids and lipid-like molecules	Steroids and steroid derivatives	Cholestane steroids	73.9	-	Metabolic pathways; Steroid degradation; Microbial metabolism in diverse environments; Insect hormone biosynthesis; Cholesterol metabolism; Ovarian steroidogenesis; Bile secretion; Primary bile acid biosynthesis; Fat digestion and absorption; Vitamin digestion and absorption; Aldosterone synthesis and secretion; Cortisol synthesis and secretion; Steroid biosynthesis; Biosynthesis of alkaloids der…	Metabolic pathways; Steroid degradation; Microbial metabolism in diverse environments; Insect hormone biosynthesis; Cholesterol metabolism; Ovarian steroidogenesis; Bile secretion; Primary bile acid biosynthesis; Fat digestion and absorption; Vitamin digestion and absorption; Aldosterone synthesis and secretion; Cortisol synthesis and secretion; Steroid biosynthesis; Biosynthesis of alkaloids der…	1.5479	1.4185	0.9252	0.01579	0.08387	6.0877	6.3134	6.1613	5.7334	5.5157	5.5149	6.2146	6.5296	6.3329	6.6285	6.4061	6.0694
pos_12816	Mmv634140	metab_12014	yes	up	-	pos	-	473.24	6.6754	M+ACN+H	C22H30ClN5O2	86.3	-	-	-	-	-	-	-	-	-	-	86.3	-	-	-	1.4662	1.5282	1.1113	0.03814	0.142	5.2791	5.6528	5.2326	4.9764	5.5699	5.5238	5.1823	4.868	5.2082	4.5064	4.0103	5.2269
pos_12903	Asperagenin	metab_12089	yes	up	-	pos	17305-15-6	466.352	6.62468	M+NH4	C27H44O5	-	86.3	HMDB0034293	-	-	-	-	-	Lipids and lipid-like molecules	Prenol lipids	Triterpenoids	-	86.3	-	-	3.3307	3.2337	1.5799	6.253e-05	0.003882	4.9295	4.9527	5.1513	4.8705	5.1049	5.117	2.7813	2.91	4.3457	2.892	3.6117	2.527
pos_12912	Acetylspiramycin (ASPM)	metab_12097	yes	down	-	pos	-	917.561	6.62087	M+CH3OH+H	C45H76N2O15	57.1	-	;MJDBOTE0001659	-	-	-	-	-	-	-	-	57.1	-	-	-	1.9123	1.8306	0.8837	0.003365	0.0355	5.5526	5.3251	5.4441	5.1976	5.1115	4.8861	5.5868	5.7888	5.4948	6.1931	6.407	6.1944
pos_12991	Adrenoyl ethanolamide	metab_12168	yes	down	C13829	pos	150314-35-5	393.347	6.5752	M+NH4	C24H41NO2	-	54.1	HMDB0013626	-	-	-	-	-	Organic nitrogen compounds	Organonitrogen compounds	Amines	-	54.1	-	-	1.7012	1.6076	0.8814	0.01924	0.09428	4.8242	5.1463	4.8576	4.803	4.0403	4.004	5.0632	5.2269	5.168	5.7087	5.3216	4.9153
pos_13120	Podecdysone B	metab_12289	yes	up	C08832	pos	-	463.302	6.53463	M+H	C27H42O6	56.3	-	-	-	-	-	-	-	-	-	-	56.3	-	-	-	1.4135	1.3445	1.0775	0.008259	0.05842	5.3385	5.5774	5.3497	5.3321	5.7477	5.8439	5.3789	4.9403	5.2159	5.1634	4.8713	5.2333
pos_13157	2-aminooctadec-4-ene-1,3-diol	metab_12322	yes	up	-	pos	-	322.273	6.51507	M+Na	C18H37NO2	61	-	-	-	-	-	-	-	-	-	-	61	-	-	-	1.2847	1.2113	1.0576	0.001608	0.0233	5.3823	5.1435	5.5986	5.3727	5.3537	5.3346	5.1263	4.9952	5.1275	5.0384	4.966	5.1761
pos_13197	Stearoyl-L-Carnitine	metab_12359	yes	up	-	pos	-	428.372	6.47553	M+H	C25H49NO4	54.6	-	HMDB0000848	-	-	-	-	-	Lipids and lipid-like molecules	Fatty Acyls	Fatty acid esters	54.6	-	-	-	1.1913	1.1344	1.0378	0.0003217	0.009655	6.552	6.6205	6.4546	6.6338	6.5517	6.5513	6.3577	6.184	6.4156	6.2462	6.3828	6.3465
pos_13210	Putative (3-hydroxyoctadecanoyl)glycine	metab_12371	yes	down	-	pos	-	390.32	6.4705	M+CH3OH+H	C20H39NO4	81.6	-	-	-	-	-	-	-	-	-	-	81.6	-	-	-	1.1898	1.1679	0.9567	0.001162	0.01941	5.8296	5.7914	5.7368	5.9501	5.7389	5.7939	5.986	6.0673	5.9138	6.2523	6.1529	6.047
pos_13395	Terrein	metab_12539	yes	up	-	pos	-	119.049	6.40253	M+H-2H2O	C8H10O3	64.7	-	-	-	-	-	-	-	-	-	-	64.7	-	-	-	1.0248	0.992	1.0449	0.005947	0.04898	4.8624	4.9721	4.9443	4.8409	5.023	4.9471	4.9477	4.7353	4.6954	4.7339	4.6673	4.5415
pos_13412	(3E,5E)-2-(4-methoxy-4-oxobutyl)nona-3,5-dienoic acid	metab_12556	yes	up	-	pos	-	255.159	6.39057	M+H	C14H22O4	76.1	-	-	-	-	-	-	-	-	-	-	76.1	-	-	-	1.305	1.3326	1.1098	0.03993	0.1457	4.4806	5.7444	4.7148	4.4443	4.7905	4.6852	4.403	4.2729	4.5275	4.279	4.3599	4.162
pos_13719	(E)-11-(5-carbamoyl-4-oxo-1H-pyridin-2-yl)undec-10-enoic acid	metab_12839	yes	up	-	pos	-	303.17	6.27225	M+H-H2O	C17H24N2O4	59.2	-	-	-	-	-	-	-	-	-	-	59.2	-	-	-	1.1024	1.0699	1.0486	0.03275	0.1297	6.4376	5.9589	5.9679	6.3646	6.2478	6.1686	6.0202	6.2003	5.8351	5.9327	5.5974	5.8359
pos_13777	6-hydroxysphingosine	metab_12891	yes	down	-	pos	-	316.284	6.2539	M+H	C18H37NO3	77.3	-	LMSP01080003	-	-	-	-	-	-	-	-	77.3	-	-	-	1.464	1.3419	0.9372	0.003966	0.03867	5.823	5.7527	5.3607	5.5195	5.416	5.7175	5.877	6.2329	5.7973	5.9933	6.0492	5.8911
pos_13869	11Beta,17Alpha,21-Trihydroxy-4-Pregnene-3,20-Dione 21-Caprylate	metab_12973	yes	up	-	pos	-	530.347	6.2069	M+ACN+H	C29H44O6	56.1	-	-	-	-	-	-	-	-	-	-	56.1	-	-	-	2.1003	2.019	1.167	0.001144	0.0192	5.5978	5.6036	5.6485	5.6171	5.532	5.5078	4.9426	4.9822	5.0028	5.0097	3.9109	4.8639
pos_13942	Soladulcidine	metab_13036	yes	up	C10826	pos	-	416.351	6.1846	M+H	C27H45NO2	66.1	-	LMST01150002;HMDB0034731	-	-	map01066	Metabolism	Chemical structure transformation maps	Lipids and lipid-like molecules	Steroids and steroid derivatives	Steroidal alkaloids	66.1	-	Biosynthesis of alkaloids derived from terpenoid and polyketide	Biosynthesis of alkaloids derived from terpenoid and polyketide	2.6201	2.5619	1.274	9.008e-05	0.004832	5.1782	4.6307	5.2655	5.405	5.4748	5.5718	4.1809	4.2609	3.5819	4.2306	4.0972	4.3941
pos_14021	3E,5E-tridecadienoic acid	metab_13108	yes	up	-	pos	-	211.169	6.15387	M+H	C13H22O2	61.2	-	LMFA01030244	-	-	-	-	-	-	-	-	61.2	-	-	-	1.701	1.656	1.1736	0.02127	0.09927	4.1481	5.0912	4.5168	4.1889	4.7886	4.6086	4.0307	3.3997	3.5051	3.6313	4.0113	4.7227
pos_14242	Deferrioxamine	metab_13312	yes	down	C06940	pos	-	623.343	6.07462	M+Na	C27H48N6O9	80.2	-	HMDB0014884	-	-	-	-	-	Organic acids and derivatives	Carboxylic acids and derivatives	Carboxylic acid derivatives	80.2	-	-	-	1.0322	1.089	0.9585	0.01946	0.09488	6.7068	6.2109	6.2906	6.7543	6.7301	6.5389	6.8989	6.8132	6.873	6.8904	6.7244	6.7311
pos_14373	Methyl Deoxycholate	metab_13437	yes	up	-	pos	-	448.341	6.00192	M+ACN+H	C25H42O4	63.3	-	-	-	-	-	-	-	-	-	-	63.3	-	-	-	4.363	4.2415	1.6931	7.824e-10	7.582e-07	6.8751	6.6398	7.0139	7.0302	7.122	7.1939	4.0463	3.9857	4.3473	4.4996	3.8656	3.9851
pos_14392	Trp derivative	metab_13455	yes	down	-	pos	-	224.091	5.99102	M+H	C11H13NO4	60.1	-	-	-	-	-	-	-	-	-	-	60.1	-	-	-	1.7861	1.7918	0.8969	0.0007716	0.01574	5.516	4.8388	5.1892	5.5457	5.3498	5.6176	6.0677	5.8637	5.8752	6.1558	5.8866	5.8945
pos_14436	Lunarine	metab_13497	yes	down	C10603	pos	-	470.264	5.96108	M+CH3OH+H	C25H31N3O4	62.8	-	-	-	-	-	-	-	-	-	-	62.8	-	-	-	1.188	1.2055	0.9423	0.01965	0.09543	5.7876	5.3707	5.2227	5.8761	5.6003	5.5295	5.9581	5.9641	5.5709	6.0511	6.0019	5.8858
pos_14491	Erinacine D	metab_13552	yes	up	-	pos	157397-40-5	520.326	5.91198	M+ACN+H	C27H42O7	-	55.7	HMDB0031896	-	-	-	-	-	Lipids and lipid-like molecules	Prenol lipids	Diterpenoids	-	55.7	-	-	5.4931	5.5047	4.3392	6.823e-06	0.000982	6.5358	6.4728	6.1144	6.482	6.6013	6.3237	1.8409	3.5029	0.2872	2.6838	0.28	0.2865
pos_15749	N-(3S-hydroxydecanoyl)-L-serine	metab_14788	yes	up	-	pos	-	276.18	4.34948	M+H	C13H25NO5	61.4	-	LMFA00000002	-	-	-	-	-	-	-	-	61.4	-	-	-	3.998	3.907	1.8367	1.735e-09	1.401e-06	5.0651	5.4304	5.4418	5.2018	5.4944	5.3574	3.0958	2.6853	2.5753	2.9329	2.9179	3.2091
pos_16401	Dropropizine	metab_15431	yes	up	-	pos	-	254.186	3.6374	M+NH4	C13H20N2O2	51.7	-	-	-	-	-	-	-	-	-	-	51.7	-	-	-	4.2325	4.0881	1.9978	1.143e-07	4.49e-05	5.5231	5.1296	5.5222	5.5163	5.57	5.6435	2.9562	2.8915	3.1108	2.8445	1.7996	2.8691
pos_16540	8-hydroxy-4-oxo-1H-quinoline-2-carboxylic acid	metab_15569	yes	up	-	pos	-	206.045	3.50182	M+H	C10H7NO4	64.4	-	;MJDBWX000002300	-	-	-	-	-	-	-	-	64.4	-	-	-	1.6243	1.6492	1.1381	0.03286	0.1299	5.2999	6.4045	6.177	5.2214	5.1972	5.8089	5.4364	4.4904	5.0873	4.595	4.8112	5.5479
pos_17204	4-(2,6,6-Trimethyl-4-oxo-2-cyclohexen-1-yl)-2-butanyl beta-D-glucopyranoside	metab_16219	yes	up	-	pos	-	436.228	2.87002	M+ACN+Na	C19H32O7	75.4	-	-	-	-	-	-	-	-	-	-	75.4	-	-	-	3.1754	2.905	1.8638	0.0264	0.1137	2.0571	4.3521	2.5966	5.9097	6.48	5.9476	3.4156	2.0512	2.0173	3.1654	2.0023	2.0159
pos_17452	(5E)-2-heptyl-3,4,7-trihydroxy-2,3,4,7,8,9-hexahydrooxecin-10-one	metab_16443	yes	up	-	pos	-	323.182	2.63683	M+Na	C16H28O5	54.7	-	-	-	-	-	-	-	-	-	-	54.7	-	-	-	1.9899	2.0316	1.178	0.008211	0.05828	6.3769	6.6739	6.5444	5.3745	5.3548	5.4545	5.2263	4.8479	5.288	5.3014	4.8733	4.8326
pos_17647	Thymine	metab_16608	yes	down	C00178	pos	65-71-4	127.05	2.3704	M+H	C5H6N2O2	95.6	-	HMDB0000262	Nucleic acids	Bases	map00240;map01100	Metabolism;Metabolism	Nucleotide metabolism;Global and overview maps	Organoheterocyclic compounds	Diazines	Pyrimidines and pyrimidine derivatives	95.6	-	Pyrimidine metabolism; Metabolic pathways	Pyrimidine metabolism; Metabolic pathways	1.1876	1.2132	0.9443	0.01337	0.0761	5.7159	5.2908	5.475	5.8555	5.7387	5.8754	5.8854	5.9732	5.8952	5.9601	5.9605	6.2861
pos_17946	N-Acetyl-L-glutamate	metab_16902	yes	down	C00624	pos	1188-37-0	212.053	1.48637	M+Na	C7H11NO5	56.2	-	HMDB0001138	-	-	map01100;map01210;map00220;map01110;map01230	Metabolism;Metabolism;Metabolism;Metabolism;Metabolism	Global and overview maps;Global and overview maps;Amino acid metabolism;Global and overview maps;Global and overview maps	Organic acids and derivatives	Carboxylic acids and derivatives	Amino acids, peptides, and analogues	56.2	-	Metabolic pathways; 2-Oxocarboxylic acid metabolism; Arginine biosynthesis; Biosynthesis of secondary metabolites; Biosynthesis of amino acids	Metabolic pathways; 2-Oxocarboxylic acid metabolism; Arginine biosynthesis; Biosynthesis of secondary metabolites; Biosynthesis of amino acids	1.402	1.3719	0.9374	0.001044	0.01832	5.2089	5.5836	5.2219	5.3469	5.2171	5.1267	5.6804	5.69	5.5738	5.6702	5.4709	5.735
pos_18185	Uric acid	metab_17131	yes	up	C00366	pos	69-93-2	169.035	1.20792	M+H	C5H4N4O3	64.4	-	HMDB0000289	-	-	map01100;map04976;map00230;map01120	Metabolism;Organismal Systems;Metabolism;Metabolism	Global and overview maps;Digestive system;Nucleotide metabolism;Global and overview maps	Organoheterocyclic compounds	Imidazopyrimidines	Purines and purine derivatives	64.4	-	Metabolic pathways; Bile secretion; Purine metabolism; Microbial metabolism in diverse environments	Metabolic pathways; Bile secretion; Purine metabolism; Microbial metabolism in diverse environments	1.7002	1.7091	1.1433	0.003864	0.03821	4.5958	5.3477	4.7802	4.5606	4.9074	5.0555	4.0549	4.3857	4.4939	4.0016	4.0333	4.6157
pos_18358	2,6-Piperidinedicarboxylic acid	metab_17292	yes	up	-	pos	-	174.076	1.09952	M+H	C7H11NO4	65.3	-	-	-	-	-	-	-	-	-	-	65.3	-	-	-	1.1805	1.0855	1.0476	0.01212	0.07213	5.8127	5.7556	5.9169	5.9093	6.028	5.8283	5.6609	5.5385	5.8046	5.7699	5.2775	5.5993
pos_18760	Formimino-L-glutamic acid	metab_17671	yes	down	C00439	pos	-	175.071	0.749967	M+H	C6H10N2O4	62.7	-	HMDB0000854	-	-	map01100;map00340	Metabolism;Metabolism	Global and overview maps;Amino acid metabolism	Organic acids and derivatives	Carboxylic acids and derivatives	Amino acids, peptides, and analogues	62.7	-	Metabolic pathways; Histidine metabolism	Metabolic pathways; Histidine metabolism	1.5727	1.5175	0.9263	0.001559	0.02294	5.4908	5.4075	5.2923	5.3029	5.4458	5.6952	5.8247	6.1907	5.9406	5.6077	5.753	5.9142
pos_18842	Thiamine monophosphate	metab_17736	yes	down	C01081	pos	495-23-8	345.077	0.718467	M+H	C12H17N4O4PS	62.2	-	HMDB0002666	-	-	map00730;map01100	Metabolism;Metabolism	Metabolism of cofactors and vitamins;Global and overview maps	Organoheterocyclic compounds	Diazines	Pyrimidines and pyrimidine derivatives	62.2	-	Thiamine metabolism; Metabolic pathways	Thiamine metabolism; Metabolic pathways	3.2617	3.1662	0.6318	0.0002489	0.008453	3.9337	2.6687	2.4344	3.9952	2.4541	3.5822	5.1561	5.2609	4.518	5.486	4.7528	5.0035
pos_18887	2-Aminoisobutyric acid	metab_17778	yes	down	C03665	pos	62-57-7	104.071	0.707967	M+H	C4H9NO2	61.7	-	HMDB0001906	-	-	-	-	-	Organic acids and derivatives	Carboxylic acids and derivatives	Amino acids, peptides, and analogues	61.7	-	-	-	1.0256	0.9678	0.9608	0.02298	0.1048	5.7207	5.5572	5.5572	5.4113	5.4713	5.3639	5.5412	5.8018	5.7911	5.8597	5.9062	5.534
pos_18937	(R)-(+)-2-Pyrrolidone-5-carboxylic acid	metab_17822	yes	down	-	pos	-	130.05	0.688	M+H	C5H7NO3	76.8	-	-	-	-	-	-	-	-	-	-	76.8	-	-	-	1.3003	1.2802	0.9548	0.0006718	0.0146	6.2733	6.3611	6.2584	6.2004	6.4998	6.516	6.7328	6.7271	6.5648	6.657	6.5612	6.6678
pos_18991	Choline	metab_17868	yes	down	C00114	pos	62-49-7	104.107	0.671517	M+H	C5H13NO	77.2	-	HMDB0000097	-	-	map01100;map00564;map02010;map04976;map00260;map04725;map05231	Metabolism;Metabolism;Environmental Information Processing;Organismal Systems;Metabolism;Organismal Systems;Human Diseases	Global and overview maps;Lipid metabolism;Membrane transport;Digestive system;Amino acid metabolism;Nervous system;Cancer: overview	Organic nitrogen compounds	Organonitrogen compounds	Quaternary ammonium salts	77.2	-	Metabolic pathways; Glycerophospholipid metabolism; ABC transporters; Bile secretion; Glycine, serine and threonine metabolism; Cholinergic synapse; Choline metabolism in cancer	Metabolic pathways; Glycerophospholipid metabolism; ABC transporters; Bile secretion; Glycine, serine and threonine metabolism; Cholinergic synapse; Choline metabolism in cancer	1.1203	1.057	0.9692	0.000894	0.01691	6.7363	6.8838	6.8163	6.6661	6.794	6.7493	6.8742	7.0693	7.0312	7.0674	6.9925	6.8989
pos_19020	Dimethylethanolamine	metab_17894	yes	down	C04308	pos	108-01-0	90.0917	0.665767	M+H	C4H11NO	62.4	-	HMDB0032231	-	-	map01100;map00564;map01110	Metabolism;Metabolism;Metabolism	Global and overview maps;Lipid metabolism;Global and overview maps	Organic nitrogen compounds	Organonitrogen compounds	Amines	62.4	-	Metabolic pathways; Glycerophospholipid metabolism; Biosynthesis of secondary metabolites	Metabolic pathways; Glycerophospholipid metabolism; Biosynthesis of secondary metabolites	1.5058	1.4785	0.8868	0.0169	0.08679	4.0459	3.9313	4.2264	4.1748	4.0244	3.847	4.6664	4.7118	4.981	4.3962	4.7931	3.798
pos_19029	Beta-Alanyl-L-arginine	metab_17903	yes	down	C05340	pos	-	246.156	0.662233	M+H	C9H19N5O3	51.2	-	HMDB0060441	-	-	map01100;map00410	Metabolism;Metabolism	Global and overview maps;Metabolism of other amino acids	Organic acids and derivatives	Peptidomimetics	Hybrid peptides	51.2	-	Metabolic pathways; beta-Alanine metabolism	Metabolic pathways; beta-Alanine metabolism	1.7314	1.6855	0.8814	0.009772	0.06365	4.4787	4.7088	4.4846	4.4142	4.2299	4.4421	5.024	4.9875	4.6137	5.5028	5.6347	4.5955
pos_19216	Agmatine	metab_18074	yes	up	C00179	pos	306-60-5	131.129	0.62735	M+H	C5H14N4	71	-	HMDB0001432	-	-	map01100;map00330	Metabolism;Metabolism	Global and overview maps;Amino acid metabolism	Organic nitrogen compounds	Organonitrogen compounds	Guanidines	71	-	Metabolic pathways; Arginine and proline metabolism	Metabolic pathways; Arginine and proline metabolism	1.4499	1.3626	1.0993	0.006986	0.05348	4.3131	4.2778	4.3655	4.5845	4.5589	4.8703	4.3516	3.9948	4.2959	3.8665	3.9973	4.0293
pos_19397	D-Ornithine	metab_18234	yes	down	C00515	pos	348-66-3	133.097	0.586	M+H	C5H12N2O2	77.3	-	HMDB0003374	-	-	map01100;map00472;map00997;map01110	Metabolism;Metabolism;Metabolism;Metabolism	Global and overview maps;Metabolism of other amino acids;Biosynthesis of other secondary metabolites;Global and overview maps	Organic acids and derivatives	Carboxylic acids and derivatives	Amino acids, peptides, and analogues	77.3	-	Metabolic pathways; D-Arginine and D-ornithine metabolism; Biosynthesis of various secondary metabolites - part 3; Biosynthesis of secondary metabolites	Metabolic pathways; D-Arginine and D-ornithine metabolism; Biosynthesis of various secondary metabolites - part 3; Biosynthesis of secondary metabolites	2.5779	2.4664	0.78	3.692e-05	0.002982	3.8304	4.0074	3.3048	3.8275	3.6999	4.1122	4.7726	4.8323	4.5074	4.9143	5.2663	4.9121
pos_16669	Indole-3-carboxaldehyde	metab_18454	yes	up	C08493	pos	487-89-8	146.06	3.37515	M+H	C9H7NO	91.5	-	HMDB0029737;HMDB0000197;HMDB0000195;MJDBSJD0000088	-	-	-	-	-	Organoheterocyclic compounds	Indoles and derivatives	Indoles	91.5	-	-	-	1.1423	1.0892	1.0507	0.005716	0.04775	5.008	5.3203	5.236	5.3453	5.2951	5.1484	5.1002	5.0269	5.0773	4.8396	4.8151	4.9869
pos_5281	Isonicotinic acid	metab_18455	yes	down	C07446	pos	55-22-1	124.039	1.16903	M+H	C6H5NO2	67.2	-	HMDB0060665;HMDB0041912	-	-	map00983	Metabolism	Xenobiotics biodegradation and metabolism	Organoheterocyclic compounds	Pyridines and derivatives	Pyridinecarboxylic acids and derivatives	67.2	-	Drug metabolism - other enzymes	Drug metabolism - other enzymes	1.4335	1.3831	0.9553	1.194e-05	0.001434	7.0748	7.06	6.9085	7.101	6.9752	6.9537	7.3605	7.458	7.2895	7.3425	7.3034	7.2877
